# Supplementary material for: A cost-effective predictive tool for AFP-negative focal hepatic lesions of retrospective study: enhancing clinical triage and decision-making
Source: PeerJ journal article supplement (doi:10.7717/peerj.19150), 2025-03-26
Supplement: Graph_Abstract.pdf [file Graph_Abstract.pdf]

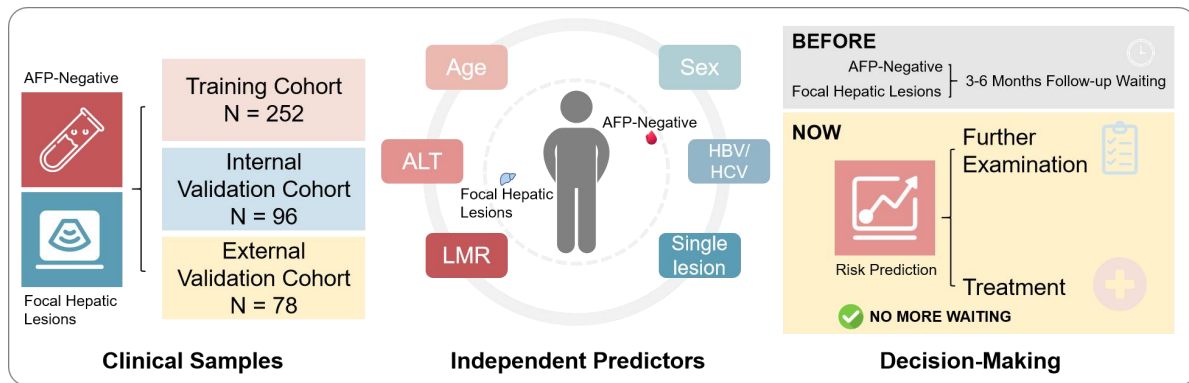

**Graph Abstract** Patients with liver-occupying lesions who were AFP-negative were divided into training, validation, and external validation sets. Independent risk factors, including age, gender, ALT levels, HBV/HCV infection status, LMR, and single lesion presence, were identified to construct a predictive model. This model aims to reduce the 3-6 month waiting time for follow-up and facilitate rapid clinical decision-making.
