# Supplementary material for: A cost-effective predictive tool for AFP-negative focal hepatic lesions of retrospective study: enhancing clinical triage and decision-making
Source: PeerJ. 2025 Mar 26;13:e19150. doi: 10.7717/peerj.19150 (PMC11954459; doi:10.7717/peerj.19150)
Supplement: Supplemental Information 1 [file peerj-13-19150-s001.xlsx]

## Sheet: sheet1
Group code	Age	Male older than 40	Gender	Department	Admission time	Drinking or not	Nonalcoholic fatty liver disease or cirrhosis combined group	Family history	Diabetes	HBV/HCV infected	Admission diagnosis	ultrasonic	CT	MRI	Number of lesions	Single lesion or not	Whether the boundary is clear	Image results (maximum diameter mm)	Image maximum diameter grouping	ALT	TP	ALB	GGT	TB	DB	WBC	NEUT%	LYMPH%	MONO%	EO%	BASO%	NRBC%	NEUT#	LYMPH#	MONO#	EO#	BASO#	NRBC#	RBC	Hb	HCT	MCV	MCHC	MCH	RDW-SD	RDW-CV	PLT	MPV	PDW
Q004	43	0	female	Minimally invasive interventional Department	2017-01-1212:22:00	0	0	0	0	0	Hepatic hemangioma	None	The surface of liver is smooth and the proportion of each lobe is even. A class of oval abnormal signal shadow can be seen under the envelope of the left outer lobe of the liver, showing low T1WI, slightly high T2WI, slightly high DWI signal, the internal signal is not uniform, and a few dot shaped and short strip shaped low signal shadow can be seen in T2WI, with clear boundary, and the size is …	The surface of liver is smooth and the proportion of each lobe is even. A kind of oval abnormal signal shadow can be seen under the capsule of the left outer lobe of the liver, showing low signal on T1WI, slightly high signal on T2WI, and slightly high signal on DWI. The internal signal is not uniform. A few dot like and short strip like low signal shadows can be seen in T2WI, with clear boundary…	1	1	1	56	2	20	72.8	45.2	0.34	8.8	1.3	6.09	70.3	22.5	5.6	1.3	0.3	0	4.28	1.37	0.34	0.08	0.02	0	4.61	136	39.9	86.6	341	29.5	39.7	12.6	156	12.4	16.4
Q005	61	1	male	Minimally invasive interventional Department	2017-02-0910:45:00	0	0	0	1	1	1. liver nodules: cirrhotic nodules? Liver cancer?; 2. hepatitis, cirrhosis, compensated chronic viral hepatitis B 3. Type 2 diabetes 4. hypertension grade 3 (very high-risk group) 5. liver cyst 6. after cataract surgery in the right eye	None	The liver surface was smooth, the volume of the left lobe was slightly increased, and several small round like long T1 and long T2 signals were scattered in the liver. The boundary was clear, and the larger one was about 3.5mm in diameter. The lesion was not enhanced after enhancement; A nodular enhancement with a diameter of about 12.5mm was seen in S8 (16 / 60) of liver in arterial phase on enh…	The liver surface was smooth, the volume of the left lobe was slightly increased, and several small round like long T1 and long T2 signals were scattered in the liver. The boundary was clear, and the larger one was about 3.5mm in diameter. The lesion was not enhanced after enhancement; A nodular enhancement with a diameter of about 12.5mm was seen in S8 (16 / 60) of liver in arterial phase on enh…	4	0	1	12.5	1	23	63.2	39.5	0.38	13.5	2.4	4.37	55.1	32	8.7	3.7	0.5	0	2.41	1.4	0.38	0.16	0.02	0	4.25	136	40.4	95.1	337	32	42.2	12	88	12.2	17.2
Q006	35	0	female	Hepatobiliary pancreatic surgery	2017-02-1609:04:00	0	0	0	0	0	Liver space occupying lesions: hemangioma?	None	The liver is as normal in size, and multiple quasi circular slightly low-density shadows can be seen in the liver. The largest one is located in the right lobe of the liver, with a size of about 82 × 85mm. Nodular enhancement can be seen at the edge of the lesion in the arterial phase, and the enhancement shadow in the portal venous phase and delayed phase spreads to the center. In the delayed ph…	None	4	0	1	85	2	6	80.3	42.9	0.47	11.7	2	9.04	54	38.4	5.2	2	0.4	0	4.88	3.47	0.47	0.18	0.04	0	6.25	119	41.2	65.9	289	19	36.3	16.8	283	11.9	16.9
Q010	28	0	female	Minimally invasive interventional Department	2017-03-2409:50:00	0	0	0	0	0	Space occupying lesions in the right lobe of the liver remain to be examined.	The shape and size of the liver section are normal, the echo of the envelope is regular, the echo of the liver parenchyma is slightly low and small light spots, evenly distributed, and an uneven echo mass can be seen in the right lobe of the liver, about 60 × 48m in size, oval in shape, unclear boundary, uneven echo, no obvious envelope echo. CDFI: punctate blood flow signal can be seen in the ma…	The surface of liver is smooth and the proportion of each lobe is uniform; A kind of circular abnormal signal shadow with a size of 44 × 58 × 46mm (section × upper and lower diameter) was seen in the S7 segment of the right liver; Plain scan showed slightly low signal on T1WI, slightly high signal on t2spair, slightly high signal on DWI, uneven internal signal, no obvious low signal was found on …	None	1	1	0	60	2	4	75	48	0.31	12.4	2.4	7.24	67.7	27.2	4.3	0.4	0.4	0	4.9	1.97	0.31	0.03	0.03	0	4.42	134	40.1	90.7	334	30.3	40.2	12.1	300	10	11.2
Q011	46	1	male	Minimally invasive interventional Department	2017-03-3009:27:00	0	1	0	0	1	1. liver space occupying: primary liver cancer? 2. Chronic hepatitis B post hepatitis cirrhosis	None	The surface of the liver was smooth, the parenchymal signal was uneven, and the delayed phase of the enhanced scan was obvious, and multiple diffuse punctate low enhancement shadows could be seen; The remaining liver parenchyma was scattered with multiple small round long T1 long T2 signal shadows, the largest of which was located in S8, with a diameter of about 11mm, and no enhancement was seen …	None	4	0	1	11	1	61	59.5	34	0.43	12.8	3	2.94	37	46.3	14.6	1.4	0.7	0	1.09	1.36	0.43	0.04	0.02	0	3.96	124	35.5	89.6	349	31.3	39.3	11.9	111	11.3	12.7
Q012	46	1	male	Hepatobiliary pancreatic surgery	2017-04-0209:22:00	0	0	0	0	0	1. Space occupying lesions in the right lobe of the liver: primary liver cancer?	The left lobe of the liver has abnormal morphology and increased volume, the right lobe of the liver has normal morphology and size, the echo distribution in the liver is uneven, the first half is slightly denser and enhanced, the second half is slightly sparse and attenuated, the structure of the intrahepatic duct is still clear, and the light band on the liver surface still exists. A substantia…	The surface of the liver was smooth, the left lobe was enlarged, and a huge mass like low-density lesion was seen in the left outer lobe of the liver, with a clear boundary, about 14.4cm × 10.4cm × 14.0cm in size. A lower density shadow was seen inside the lesion, and irregular calcification was seen in the center. After dynamic enhancement, the peripheral nodular enhancement of the lesion was ob…	None	4	0	0	144	2	9	66.2	40.1	0.45	11.1	1.5	7.44	52.4	36.2	6	4.3	1.1	0	3.9	2.69	0.45	0.32	0.08	0	4.81	142	44.7	92.9	318	29.5	43	12.5	263	10.4	12.5
Q016	29	0	female	Minimally invasive interventional Department	2017-04-2509:39:00	0	0	0	0	0	Hepatic hemangioma	The shape and size of the liver section are normal, and the echo in the liver is uneven. A substantial mass echo can be seen in the right lobe of the liver, about 105 × 80mm in size, quasi circular in shape, hypoechoic inside, hyperechoic halo around, uneven distribution, clear boundary, regular edge, no change in the rear echo, and the blood vessels in the liver are pushed and displaced. The sha…	None	The proportion of each lobe of the liver is uniform; A large round like abnormal signal shadow can be seen in the lower segment of the right lobe of the liver, showing low T1WI, high t2spair, and high DWI signals. The internal signal is slightly uneven, the boundary is clear, and the edge is not smooth. The size is about 78mm*73mm*100mm (anteroposterior diameter × transverse diameter × upper and …	1	1	1	105	2	9	67.4	43.1	0.31	11.9	1.9	5.26	47.3	44.7	5.9	1.7	0.4	0	2.49	2.35	0.31	0.09	0.02	0	4.04	110	35.1	86.9	313	27.2	42.6	13.4	263	10	11.1
Q018	54	0	female	Minimally invasive interventional Department	2017-05-0910:38:00	0	0	0	0	1	1) Intrahepatic space occupying: liver cancer? 2) Chronic viral hepatitis B; 3) Cirrhosis (decompensated)	None	The ratio of liver lobes was abnormal, the volume was reduced, the surface was wavy, the density of liver parenchyma was uneven, diffuse multiple slightly high-density nodules were seen in the liver, the CT value was about 80hu, and the enhancement was even after enhancement. A low-density nodular shadow with a size of about 2.1 × 2.7cm and a CT value of about 44hu was seen in the upper segment o…	None	4	0	1	27	1	56	59.2	17.7	0.3	77	32	3.82	45.8	38.7	7.9	6.8	0.8	0	1.75	1.48	0.3	0.26	0.03	0	2.77	101	30.5	110.1	331	36.5	54.9	13.7	65	11	11.5
Q020	63	1	male	Hepatobiliary pancreatic surgery	2017-05-1412:49:00	0	0	0	0	1	1. The nature of liver space occupying lesions remains to be investigated: liver cancer? 2. Iron deficiency anemia 3, hypertension 4, coronary heart disease	The morphology of the liver section is basically normal, the surface of the liver envelope is smooth, the echo distribution in the liver is uneven, a substantial mass can be seen in the right lobe of the liver, the size is about 95 × 84mm, the shape is irregular, the interior is equal echo, the distribution is uneven, the edge is not clear, the echo in the rear is weakened, there is sound halo ar…	The liver surface is smooth, the proportion of liver lobes is coordinated, and the liver fissure is not wide. A slightly high-density shadow of about 7.7 × 8.6cm can be seen in the lower segment of the right lobe of the liver. The internal density is uneven, and a speckled low-density shadow can be seen. A pseudocapsule can be seen around it. The enhanced scan shows uneven and obvious enhancement…	None	1	1	0	95	2	34	77.1	35.2	0.42	7.7	2.4	3.4	59	26.8	12.4	1.5	0.3	0.3	2.01	0.91	0.42	0.05	0.01	0.01	2.56	44	17.6	68.8	250	17.2	43.6	17.4	130	11	15.5
Q021	45	0	female	Minimally invasive interventional Department	2017-05-1509:47:00	0	0	0	0	1	1. hilar cholangiocarcinoma with multiple systemic metastases (intrahepatic, bilateral adrenal glands, gastric antrum, duodenum, abdominal cavity, retroperitoneal, left supraclavicular lymph nodes) 2. obstructive jaundice 3. chronic viral hepatitis B 4. ascites 5. causes of muscle strength decline in the right limb	None	The gallbladder volume increased, the wall was significantly thickened, and the enhancement was uneven. Nodular dense shadow was seen in the gallbladder, the gallbladder base and neck were not clearly displayed, the intrahepatic bile duct was significantly dilated, and suddenly cut off at the common hepatic duct. The enhanced nodular shadow was seen at the cut-off, and the lower extrahepatic bile…	None	4	0	1	62.0	2	45	54	31.1	0.49	335	193.5	4.66	74.5	13.5	10.5	0.6	0.9	0	3.47	0.63	0.49	0.03	0.04	0	3.39	98	28.1	82.9	349	28.9	53.2	18.1	354	10.8	12.1
Q023	53	0	female	Hepatobiliary pancreatic surgery	2017-05-1709:51:00	0	0	0	0	0	1. huge hemangioma of the liver 2. small cysts of both kidneys 3. lumbar disc herniation	None	The shape and size of the liver are normal, the surface is smooth, the proportion of liver lobes is normal, the liver fissure is not widened, a large low-density shadow can be seen in S2 of the liver, the boundary is not clear, the size is about 58mm × 48mm, and the CT value is about 36hu. Patchy and nodular obvious enhancement can be seen at the edge of the lesion in the enhanced arterial phase,…	None	2	0	0	58	2	15	69.7	44.3	0.4	8.6	1.2	4.77	42.8	42.1	8.4	6.1	0.6	0.2	2.04	2.01	0.4	0.29	0.03	0.01	4.89	147	45.7	93.5	322	30.1	45	13.2	200	10.3	11.1
Q024	61	1	male	Minimally invasive interventional Department	2017-06-0609:48:00	0	0	0	1	0	1. hepatic hemangioma; 2. elevated blood lipids; 3. elevated blood glucose	None	Each lobe of the liver is normal in size and morphology, with smooth edges. A class of oval slightly low-density foci can be seen in the upper posterior segment of the right lobe, with clear boundaries and uneven internal density. The CT value is about 47hu, with a size of about 5.1 × 2.9cm. Obvious nodular enhancement can be seen at the edge of the lesion in the enhanced arterial phase, with a C…	None	1	1	1	51	2	44	72.5	44.6	0.44	13.2	1.8	6.63	54.8	33.8	6.6	3.6	1.2	0	3.63	2.24	0.44	0.24	0.08	0	5	149	43.6	87.2	342	29.8	38.6	12.1	196	9.7	10.3
Q025	53	1	male	Hepatobiliary pancreatic surgery	2017-06-1710:20:00	0	0	0	0	0	1. Liver space occupying lesions: inflammatory pseudotumor? Liver Ca? 2. liver cyst 3. left kidney cyst	The morphology of the liver section is basically normal, the surface of the liver envelope is smooth, the echo distribution in the liver is uneven, a substantial mass can be seen in the right lobe of the liver, the size is about 24 × 18mm, the shape is nodular, the interior is hypoechoic, the distribution is homogeneous, the edge is clear, the surrounding is silent halo, no satellite nodules are …	None	None	1	1	1	24	1	20	62.1	40	0.53	9.7	1.7	6.17	55.4	32.1	8.6	3.1	0.8	0	3.42	1.98	0.53	0.19	0.05	0	4.7	146	43.7	93	334	31.1	43.1	12.6	233	10.6	12.1
Q027	47	0	female	Hepatobiliary pancreatic surgery	2017-07-07 10:05:00	0	0	0	0	0	1. multiple hemangiomas of the liver 2. focal fatty liver in the right lobe of the liver 3. cysts in the right lobe of the liver 4. cysts in the right kidney 5. space occupying lesions in the left adrenal gland 6. frequent ventricular premature beats 7. after hysterectomy	The shape and size of the liver section are basically normal, the envelope surface of the left outer lobe of the liver is uneven, the echo distribution in the liver is uneven, the first half is thickened and enhanced, the second half is sparse and attenuated, a substantial mass can be seen in the left outer lobe of the liver, the size is about 65 × 39mm, the shape is lobulated, the interior is sl…	None	None	2	0	0	65	2	24	77.1	45.7	0.27	13.9	1.9	4.27	56.3	35.1	6.3	1.6	0.7	0	2.4	1.5	0.27	0.07	0.03	0	5.6	122	39.6	70.7	308	21.8	36.7	14.7	206	12.8	18.7
Q028	65	1	male	Hepatobiliary pancreatic surgery	2017-07-1310:27:00	0	0	0	0	0	Liver space occupying lesions: liver cancer	The left lobe of the liver has abnormal morphology, no obvious increase in volume, uneven envelope, and disordered internal structure. A solid mass can be seen in it, with an approximate range of about 98 × 54mm, irregular shape and unclear boundary. The interior is mainly hyperechoic and unevenly distributed. An expanded bile duct like pipeline structure can also be seen, with a width of about 3…	None	None	1	1	0	98	2	12	76.4	35.9	1.36	8.1	1.9	7.88	61.5	18.8	17.3	1.9	0.5	0	4.85	1.48	1.36	0.15	0.04	0	5.16	150	45	87.2	333	29.1	40.7	12.5	189	9.4	9.6
Q030	51	1	male	Minimally invasive interventional Department	2017-07-2009:15:00	0	0	0	0	1	Intrahepatic space occupying: primary liver cancer? Metastatic liver cancer?	None	Large irregular and slightly low-density areas can be seen in S4 and 5 segments of the liver, the boundary is not clear, the boundary of enhanced scan is clearer than before, obvious uneven peripheral enhancement can be seen in arterial phase and portal phase, and small branches of hepatic artery can be seen, the lesion range is about 85 × 64mm, abnormal hyperperfusion areas can be seen around th…	None	4	0	0	85	2	36	71.7	30.8	0.8	25.8	10.6	9.87	72.7	14.1	8.1	4.7	0.4	0	7.18	1.39	0.8	0.46	0.04	0	3.85	116	34.9	90.6	332	30.1	43	13.2	165	11.6	14
Q031	48	1	male	Minimally invasive interventional Department	2017-07-2109:56:00	0	0	0	0	0	The nature of liver space occupying remains to be investigated: hepatic hemangioma?	None	A kind of oval slightly low-density shadow can be seen in S4 of liver, the boundary is not clear, about 36mm × 19mm in size, its internal density is still uniform, the CT value is about 43hu, the edge of the lesion in enhanced arterial phase seems to see spot like and nodular slightly enhanced, the enhancement range in portal phase is expanded, and the enhancement in delayed phase further spreads…	None	4	0	0	36	2	52	66.7	40.8	0.38	12.1	2.1	5.97	50.4	40.4	6.4	2.3	0.5	0	3.01	2.41	0.38	0.14	0.03	0	4.9	144	42.1	85.9	342	29.4	39.4	12.5	331	9.1	9.7
Q032	50	1	male	Hepatobiliary pancreatic surgery	2017-07-2510:14:00	0	0	0	0	1	1. Right hepatic space occupying: liver cancer? 2. Gallstone	None	Plain scan showed that the liver volume was not large, the surface was not smooth, and a slightly low-density shadow of about 59 × 57mm was seen in the right posterior lobe of the liver. Enhanced scan showed uneven enhancement in the arterial phase, obvious peripheral enhancement, unclear boundary, tortuous and thickened neovascularization was seen in the liver, and the lesions in the portal phas…	None	1	1	0	59	2	57	70.7	40.2	0.77	16	3.4	6.14	56.5	28.2	12.5	2	0.8	0	3.47	1.73	0.77	0.12	0.05	0	4.85	145	43.2	89.1	336	29.9	42.6	13.1	208	11.5	14.6
Q034	37	0	male	Minimally invasive interventional Department	2017-08-0209:46:00	1	1	0	0	1	1. the possibility of hepatic hemangioma is high; 2. multiple kidney stones; 3. hyperuricemia	None	The size of the liver on plain scan was normal. One lesion was found in the upper segment of the left outer lobe and the left inner lobe of the liver, and two quasi circular low-density foci were found in the lower segment of the right anterior lobe and the lower segment of the right posterior lobe of the liver. The boundary was unclear, and the diameter was about 0.9-5.5cm. In the enhanced arter…	None	4	0	0	55	2	20	70.5	46.9	0.5	9.1	1.6	6.71	53	37.6	7.5	1	0.9	0	3.56	2.52	0.5	0.07	0.06	0	5.85	170	51.1	87.4	333	29.1	40.3	12.6	205	11.5	14.3
Q036	31	0	male	Minimally invasive interventional Department	2017-08-2409:34:00	0	0	0	0	1	1. focal nodular hyperplasia in liver space occupying lesions small hepatocellular carcinoma is not excluded; 2. chronic viral hepatitis B	None	The size and morphology of the liver were normal, and the edge was smooth. A kind of circular low-density shadow was seen in S2 of the liver, about 4.5mm in diameter, with clear boundary. No enhancement was seen in all phases of the enhanced scan; Several quasi circular low-density shadows were seen in S2, 4 and 7 of the liver, with unclear boundaries. The larger one was located in S7, with a dia…	The surface of liver is smooth and the proportion of each lobe is even. Multiple long T1 and T2 signal shadows can be seen in the liver, with a diameter of about 3-10mm and a clear boundary. The lesions on DWI (b=800) are slightly hyperintense, and a few spot like enhancement can be seen at the edge of the enhanced arterial phase. The contrast medium in portal venous phase and delayed phase gradu…	4	0	0	8	1	20	66.5	41.4	0.29	26.1	3.8	3.77	54.1	36.6	7.7	1.1	0.5	0	2.04	1.38	0.29	0.04	0.02	0	4.71	140	42.2	89.6	332	29.7	41.4	12.6	193	14	23.5
Q040	65	1	male	Hepatobiliary pancreatic surgery	2017-10-1010:22:00	0	1	0	0	1	1. space occupying lesions in the right posterior lobe of the liver 2. gallstones 3. hepatitis B virus carriers 4. multiple small cysts in the left kidney	The shape of the liver section is normal, the volume is not significantly reduced, the surface of the liver capsule is not smooth, the front end of the liver margin is blunt, the echo in the liver is thickened and enhanced, and the distribution is uneven. A hypoechoic mass with a size of about 42 × 36mm can be seen in the right posterior lobe of the liver, the shape is irregular, and the boundary…	None	None	1	1	0	42	2	33	69.3	39.3	0.52	14.5	2.8	5.62	49.5	36.5	9.3	3.6	1.1	0	2.79	2.05	0.52	0.2	0.06	0	4.47	141	42.1	94.2	335	31.5	46.4	13.4	121	10.3	11.6
Q042	32	0	male	Minimally invasive interventional Department	2017-10-1910:09:00	0	0	0	0	1	1. hepatic hemangioma; 2. chronic viral hepatitis B	The shape and size of the liver section are normal, the echo of the capsule is regular, and the echo of the liver parenchyma is evenly distributed. Several larger ones can be seen in the liver, which are located in the right lobe of the liver, with abnormal hyperechogenicity of about 49.5 × 48.6mm circular shape, clear boundary, uneven texture, and sparse blood flow signal. The main portal vein i…	The liver surface is smooth, the proportion of liver lobes is coordinated, the liver fissure is not wide, the quasi circular slightly low-density shadow can be seen in the liver S8, the density is uneven, the center shows a lower density shadow, the range is about 49 × 53mm, the edge of the lesion in the arterial phase of enhanced scanning is punctate and nodular obvious enhancement, the enhancem…	None	4	0	1	49.5	2	51	65.5	42.4	0.65	11.4	2	7.05	44.4	41.6	9.2	4.1	0.7	0	3.13	2.93	0.65	0.29	0.05	0	5.48	145	46.2	84.3	314	26.5	39.9	12.8	226	11.4	13.9
Q046	55	1	male	Minimally invasive interventional Department	2017-11-1909:06:00	0	0	0	0	0	Primary liver cancer; Obstructive jaundice; Ascites.	None	The liver morphology was irregular, the liver margin was uneven, and the liver fissure was not significantly widened; Multiple nodules of different sizes were seen in the liver, some of which were fused in clumps, showing low T1WI, high t2spair, and slightly high signal on DWI. The larger ones were located in the S6 segment of the liver. The size of the mass was about 64 × 73 × 63mm (transverse d…	The liver morphology was irregular, the liver margin was uneven, and the liver fissure was not significantly widened; Multiple nodules of different sizes were seen in the liver, some of which were fused in clumps, showing low T1WI, high t2spair, and slightly high signal on DWI. The larger ones were located in the S6 segment of the liver. The size of the mass was about 64 × 73 × 63mm (transverse d…	4	0	0	73	2	112	62.4	34.3	0.62	248.6	141.4	7.92	74.4	16.8	7.8	0.6	0.4	0	5.89	1.33	0.62	0.05	0.03	0	4.57	136	40.2	88	338	29.8	48.3	15.1	235	12.6	16.4
Q049	39	0	male	Hepatobiliary pancreatic surgery	2017-11-2811:25:00	1	1	0	0	1	1. Liver space occupying lesions: primary hepatocellular carcinoma? 2. Gallstone with chronic cholecystitis 3. Hepatitis B virus carrier	The shape and size of the liver section were normal, the echo of the capsule was regular, the echo of the liver parenchyma was rough and uneven, and some areas showed nodules like hyperechogenicity, which were larger, about 7.7 × 6.1mm irregular, unclear boundary, uneven texture, and few blood flow signals. The main portal vein is not wide. The shape and size of the gallbladder section are normal…	None	The liver volume is slightly larger, the proportion of each lobe is relatively symmetrical, and the liver fissure is not widened; On plain scan, the signal of liver parenchyma is rough and uneven, patchy T1WI is slightly low, t2spair is slightly high signal shadow, a kind of circular slightly long T1 long T2 signal shadow can be seen under the liver S7 envelope, the edge is clear, and the diamete…	1	1	0	7.7	1	26	61.2	38.5	0.45	15.6	2.9	5.16	54.6	31.2	8.7	4.5	1	0	2.82	1.61	0.45	0.23	0.05	0	4.87	148	43.8	89.9	338	30.4	41.5	12.5	112	13.2	17
Q052	33	0	male	Minimally invasive interventional Department	2017-12-2712:01:00	0	0	0	0	0	Hepatic hemangioma	None	The surface of the liver was smooth, and the proportion of each lobe was uniform. The inhomogeneity of Tiwi and T2WI signals in the liver parenchyma increased, and the inhomogeneity of Tiwi inverse phase signals decreased. An abnormal signal shadow can be seen in the left outer lobe of the liver, showing low T1WI, high t2spair and high DWI signals. The internal signal is uniform and the boundary …	The surface of the liver was smooth, and the proportion of each lobe was uniform. The inhomogeneity of Tiwi and T2WI signals in the liver parenchyma increased, and the inhomogeneity of Tiwi inverse phase signals decreased. An abnormal signal shadow can be seen in the left outer lobe of the liver, showing low T1WI, high t2spair and high DWI signals. The internal signal is uniform and the boundary …	3	0	1	106	2	114	70	45.7	0.57	15.4	2.7	6.61	43.6	41.6	8.6	5.3	0.9	0	2.88	2.75	0.57	0.35	0.06	0	4.83	153	43.3	89.6	353	31.7	38.1	11.8	204	9.5	11
Y003	31	0	female	Minimally invasive interventional Department	2018-01-1912:08:00	0	1	0	0	1	Cirrhotic nodules; Hepatitis B cirrhosis	None	The size and morphology of the liver are normal. Irregular patchy slightly low-density shadows can be seen in the right lobe of the liver, with unclear edges. The maximum section is about 62 × 46mm. The plain CT value is about 31-40hu. The enhancement of the lesions on enhanced scan is uneven, with unclear edges. Vascular shadows can be seen passing through, and a small patchy non enhanced area c…	The liver volume is plump, and the liver fissure is not widened; The signal of liver parenchyma on plain scan was not uniform; Irregular patchy slightly long T1 slightly long T2 signal shadow can be seen in the right lobe of the liver, the edge is blurred, and the range is about 58 × 53mm. The edge of enhanced scan is uneven centripetal and delayed enhancement. DWI diffusion weighted imaging show…	1	1	0	62	2	14	70.3	40.4	None	12.1	2.7	5.12	50.5	39.5	8.4	1	0.6	0	2.59	2.02	0.43	0.05	0.03	0	4.19	124	38	90.7	326	29.6	41.1	12.4	232	10.4	11.9
Y006	69	1	male	Minimally invasive interventional Department	2018-02-0110:47:00	0	0	0	0	0	1) Liver space occupying lesions: liver cancer? 2) Chronic viral hepatitis B; 3) After abdominal wall hernia surgery. 4) After cholecystectomy.	None	Massive and other low-density shadows can be seen in the caudal lobe of the liver, with uneven density, with a cross-sectional area of about 6.9cm × 8.3cm, and a CT value of about 32-48hu. Multiple vascular shadows in the mass can be seen in the arterial phase of enhanced scanning, with a CT value of about 48-109hu. The enhancement range increases in the venous phase, with a CT value of about 48-…	None	3	0	1	83	2	14	67	34	None	10.8	2.1	7.55	65.1	21.9	8.2	3.7	1.1	0	4.92	1.65	0.62	0.28	0.08	0	3.89	116	36	92.5	322	29.8	45.1	13.3	203	10.8	12.2
Y008	49	1	male	Minimally invasive interventional Department	2018-02-2109:27:00	0	0	0	0	0	1) Liver abscess; 2) Electrolyte disorder (low sodium, low chlorine, low calcium, low potassium); 3) Hypertension	None	A huge irregular density shadow with the size of about 12.cm*19.3cm can be seen in the liver parenchyma near the top of the diaphragm, and the boundary is unclear. No obvious abnormality is found in the remaining liver parenchyma	None	1	1	0	193	2	57	52.5	25.1	None	35.7	20.7	22.23	88.9	7	3.5	0.3	0.3	0	19.76	1.56	0.78	0.06	0.07	0	3.51	108	30.9	88	350	30.8	36.7	11.4	405	9.9	10.4
Y011	45	1	male	Minimally invasive interventional Department	2018-02-2710:04:00	0	1	0	0	1	1. small liver cancer with liver space occupying potential; 2. chronic hepatitis B cirrhosis	None	None	The liver surface is slightly uneven, the proportion of liver lobes is imbalanced, the right lobe is reduced, the left lobe is increased, a small dot like long T2 signal is seen in the S8 segment of the liver, and multiple high-intensity nodules of different sizes are seen in the arterial phase after arterial enhancement	4	0	1	2	1	34	63.5	37.8	None	16.5	2.9	4.8	46.4	41.5	9.4	2.1	0.6	0	2.23	1.99	0.45	0.1	0.03	0	5.3	165	48.8	92.1	338	31.1	39.8	11.7	143	11.8	16.3
Y013	79	1	male	Minimally invasive interventional Department	2018-03-1410:41:00	0	0	0	0	0	1) Liver abscess; 2) Sepsis (Escherichia coli infection)	None	External hospital	None	4	0	1	62.0	2	27	59.6	26.5	None	14.5	4.1	18.2	90.6	3.5	5.7	0.1	0.1	0	16.49	0.64	1.04	0.01	0.02	0	3.83	106	31	80.9	342	27.7	39	13.4	257	10.1	10
Y016	44	0	female	Hepatobiliary pancreatic surgery	2018-03-2010:07:00	0	0	0	0	0	Hepatic space occupying lesions	The shape and size of the liver section are normal, and the echo in the liver is uneven. A substantial mass echo can be seen in the left inner lobe of the liver, about 10 × 11mm in size, quasi circular in shape, hyperechoic in the interior, heterogeneous in distribution, clear boundary, regular edge, no change in the rear echo, and no displacement of the blood vessels in the liver.	None	The surface of liver is smooth and the proportion of each lobe is uniform; A kind of round slightly long T1 slightly long T2 signal nodule shadow can be seen in S4, with clear boundary, about 11mm in diameter, increased DWI signal, decreased ADC, obvious enhancement can be seen in arterial phase of enhanced scan, the enhancement is still uniform, the enhancement in portal phase and delayed phase …	2	0	1	11	1	9	64.9	39.6	None	8	1.2	4.35	41.6	45.5	10.1	2.3	0.5	0	1.81	1.98	0.44	0.1	0.02	0	5.08	99	32.3	63.6	307	19.5	44.6	20.5	385	9.6	12
Y017	46	0	female	Minimally invasive interventional Department	2018-03-2410:03:00	0	0	0	0	0	Hepatic hemangioma	None	Each lobe of the liver is normal in size and morphology, with smooth edges. A class of oval slightly low-density foci can be seen across S4, 2, and 3 of the liver. The boundary is clear, and its internal density is not uniform. The CT value is about 47hu, and the maximum cross-sectional diameter is about 54 × 45mm. Obvious small nodular enhancement can be seen at the edge of the lesion in the enh…	None	2	0	1	54	2	27	65.7	35.6	None	14.3	3	4.61	46.2	38	9.5	5	1.3	0	2.13	1.75	0.44	0.23	0.06	0	4.37	126	39.5	90.4	319	28.8	44	13.2	221	10.5	11.5
Y018	33	0	female	Minimally invasive interventional Department	2018-03-2809:11:00	0	0	0	0	0	Hepatic hemangioma	None	Each lobe of the liver is normal in size and morphology, with smooth edges. A class of circular slightly low-density foci can be seen in the right posterior lobe, with clear boundaries, and the size is about 5.8*5.1cm	None	1	1	1	58	2	7	70.1	39.5	None	8.3	1.7	3.96	46.9	40.7	9.3	2.8	0.3	0	1.86	1.61	0.37	0.11	0.01	0	3.81	113	35.1	92.1	322	29.7	42.4	12.6	212	10.9	12.6
Y021	32	0	male	Minimally invasive interventional Department	2018-03-3110:44:00	0	0	0	0	0	1. hepatic space occupying lesions; 2. splenomegaly; 3. follow up of chronic viral hepatitis B hepatitis cirrhosis decompensated period	The shape of the liver section is abnormal, the volume is not significantly reduced, the surface of the liver envelope is wavy, the front end of the liver margin is blunt, the echo in the liver is thickened and enhanced, and the distribution is uneven. Scattered slightly hyperechoic masses, about 5 × 4mm, are seen in the liver, the boundary is not clear, and there is no obvious sense of sphere. T…	The liver volume is reduced, the surface is not smooth, the proportion of liver lobes is imbalanced, the left outer lobe is increased, the right lobe is reduced, the density in the liver is not uniform, showing multiple small nodules, but no obvious focal space occupying lesions. Three phase enhanced scan showed that the liver density was still uniform, and no obvious abnormal enhancement foci we…	None	0	1	1	5	1	20	62.1	29.3	None	42.3	10.4	2.31	71	16	9.1	3.5	0.4	0	1.64	0.37	0.21	0.08	0.01	0	4.07	87	27.5	67.6	316	21.4	41	17.8	27	10.7	12.4
Y022	66	0	female	Hepatobiliary pancreatic surgery	April 4, 2018 10:48:00	0	0	0	0	0	1. Space occupying lesions in the left lobe of the liver: nature unknown; 2. Small polyp of gallbladder; 3. High risk of grade 2 hypertension	None	The liver surface is smooth, the proportion of liver lobes is coordinated, the liver fissure is not wide, and a large class of circular and small circular low-density shadow can be seen in the left inner lobe and the right lobe of the liver, respectively, with the range of about 61*54 and 16*14mm, and the CT value is about 40hu. On enhanced scan, the edge is significantly enhanced, mural nodules …	None	4	0	0	61	2	25	74.3	39.9	None	8.7	1.5	6.03	59.9	28.7	9.1	1.8	0.5	0	3.61	1.73	0.55	0.11	0.03	0	4.63	134	41.1	88.8	326	28.9	43.3	13.3	217	11.3	14
Y023	56	1	male	Minimally invasive interventional Department	2018-04-0909:43:00	0	0	0	0	0	1. hepatic hemangioma; 2. erosive gastritis	None	External hospital, multiple hemangiomas, the largest is 4.1*3.4c M	None	4	0	1	41	2	31	64.3	40.7	None	13.5	2.2	7.77	78.7	11.8	7.9	1.2	0.4	0	6.12	0.92	0.61	0.09	0.03	0	4.5	139	41.4	92	336	30.9	39.6	11.8	182	11.1	13.2
Y024	43	1	male	Minimally invasive interventional Department	2018-04-1609:54:00	0	0	0	0	0	Hepatic hemangioma	None	Hemangioma, about 7cm in diameter	None	1	1	1	70	2	28	67.7	43	None	14.2	2.3	9.98	58.9	31.8	5.9	2.5	0.9	0	5.88	3.17	0.59	0.25	0.09	0	5.05	134	42.9	85	312	26.5	39.9	13.2	206	10.1	10.9
Y025	66	0	female	Minimally invasive interventional Department	2018-04-2009:46:00	0	0	0	0	0	1. liver cyst; 2. hepatic hemangioma; 3. hypertension; 4. atherosclerosis; 5. after thyroid surgery; 6. after meniscus injury surgery	None	The liver is not large, and multiple cystic low-density foci can be seen in the left and right lobes of the liver. The larger one is located in the S7 segment, with a size of 4.9cm*6.7cm. The lesion boundary is clear	None	4	0	1	67	2	9	61.1	38.1	None	26.6	4.2	2.96	61.5	26	7.4	4.4	0.7	0	1.82	0.77	0.22	0.13	0.02	0	3.76	113	33.9	90.2	333	30.1	45.1	13.5	226	9.9	10.7
Y031	65	1	male	Hepatobiliary pancreatic surgery	2018-05-1710:22:00	0	0	0	0	0	1. cause of low back pain 2. hypertension grade 3 (very high-risk group) 3. degeneration of thoracic intervertebral disc	The shape of the liver section is normal, the volume is not large, the echo distribution in the liver is uneven, the front half is slightly thickened and enhanced, the rear half is slightly sparse and attenuated, and several anechoic areas can be seen in the right lobe, which are larger 33x28mm, with good sound transmission, and the rear sound is enhanced. The structure of the intrahepatic duct i…	Multiple round like non enhanced low-density shadows were seen in the liver parenchyma; The density of liver parenchyma generally decreased, and the CT value was about 46hu	The surface of liver is smooth and the proportion of each lobe is uniform; Multiple round like abnormal signal shadows with low T1WI and high t2spair can be seen in the liver, with clear boundaries. The largest one is about 44mm in diameter, located in the upper segment of the right posterior lobe of the liver, and some of them protrude beyond the liver contour, and the lesion is not enhanced aft…	4	0	1	33	2	14	70.5	41.3	None	11	1.4	7.52	73.6	17	6.1	2.1	1.2	0	5.53	1.28	0.46	0.16	0.09	0	4.74	134	40.5	85.4	331	28.3	41.3	13.2	255	9.6	11
Y033	56	0	female	Hepatobiliary pancreatic surgery	2018-06-1210:14:00	0	0	0	0	0	1. The nature of liver space occupying remains to be examined: tumor? 2. Gallstone 3, intrahepatic bile duct stone 4, common hepatic duct stone	None	The liver surface is smooth, the proportion of liver lobes is coordinated, and the liver fissure is not wide. The intrahepatic and extrahepatic bile ducts were obviously unevenly dilated, and multiple nodular, granular high-density stone shadows were seen inside, which were piled up into columnar shapes. The largest stone in the bile duct of the left lobe of the liver was about 23 × 29mm, and the…	None	4	0	0	29	1	20	60.4	36.3	None	10.7	2.1	9.14	61.4	27.5	5.9	4.2	1	0	5.62	2.51	0.54	0.38	0.09	0	4.07	129	39	95.8	331	31.7	42.7	12.1	220	10.1	11.2
Y034	67	1	male	Hepatobiliary pancreatic surgery	2018-06-1310:36:00	0	0	0	0	0	Left hepatic mass: hepatic cyst	None	The size and morphology of the liver are normal. Multiple slightly low-density shadows of different sizes can be seen in the liver parenchyma, with clear boundaries and no enhancement. The larger one is about 50*48mm	None	4	0	1	50	2	16	68.8	39.2	None	17.6	3	8.42	55.3	32.1	7.6	4.3	0.7	0	4.66	2.7	0.64	0.36	0.06	0	4.62	143	42.8	92.6	334	31	41.4	12.1	287	10.1	10.4
Y035	74	1	male	Hepatobiliary pancreatic surgery	2018-06-1410:11:00	1	0	0	1	1	1. Liver space occupying lesions: primary liver cancer? 2. Left lung tumor: lung cancer? 3. Type 2 diabetes 4, hypertension 5, hepatitis B	The morphology of the liver section is basically normal, the volume of the left lobe is increased, the surface of the liver envelope is slightly less smooth, the echo distribution in the liver is uneven, a substantial mass can be seen in the left outer lobe of the liver, the size is about 62 × 52mm, the shape is quasi circular, the interior is hypoechoic, the distribution is uneven, the edge is c…	The liver surface is smooth, the proportion of liver lobes is coordinated, the liver fissure is not wide, two slightly low-density shadows can be seen in the S2 segment of the liver, the boundary is fuzzy, and the sizes are about 63*59mm and 12*10mm respectively. After enhancement, the early lesions of the artery show patchy enhancement, the density of the lesions in the venous phase is slightly …	None	2	0	0	62	2	13	59.2	32.2	None	10.1	1.9	7.6	66.9	21.1	8.7	2.6	0.7	0	5.09	1.6	0.66	0.2	0.05	0	4.33	132	40.5	93.5	326	30.5	42.8	12.4	155	9.8	10.1
Y037	42	1	male	Hepatobiliary pancreatic surgery	2018-07-1909:12:00	0	0	0	0	1	1. liver space occupying lesions: liver cancer? 2. splenomegaly	External hospital	External hospital	None	4	0	1	62.0	2	17	75.9	42.8	None	15.8	3.4	9.26	66.1	19	9	5.4	0.5	0	6.12	1.76	0.83	0.5	0.05	0	4.68	139	42.2	90.2	329	29.7	42.2	12.9	183	10.5	12.6
Y038	55	1	male	Hepatobiliary pancreatic surgery	2018-07-2511:57:00	0	0	0	1	1	The nature of liver space occupying remains to be examined: primary liver cancer?	None	External hospital, right posterior hepatic mass, diameter about 6cm	None	4	0	1	60	2	41	72.4	44.5	None	11.8	2	10.19	60.5	27.2	8	3.5	0.8	0	6.16	2.77	0.82	0.36	0.08	0	6.72	137	44.2	65.8	310	20.4	34.8	17.2	214	11.3	18.6
Y039	56	0	female	Hepatobiliary pancreatic surgery	2018-07-2512:01:00	0	0	0	0	0	Right liver mass: angiomyolipoma?	None	A shallow lobulated slightly low-density shadow can be seen in liver S5, with a clear boundary, and the range is about 24 × 18mm. Obvious uniform enhancement can be seen in arterial phase of enhanced scan, and the lesions in portal phase and delayed phase are slightly high-density shadow relative to normal liver parenchyma; A kind of circular slightly low-density shadow with a diameter of about 1…	None	2	0	1	24	1	33	68.1	39.8	None	10.1	1.7	7.69	53.2	36.7	6.8	2.5	0.8	0	4.1	2.82	0.52	0.19	0.06	0	4.44	131	40	90.1	328	29.5	41.7	12.8	231	13.4	19.3
Y040	57	0	female	Hepatobiliary pancreatic surgery	2018-08-07 10:50:00	0	0	0	0	0	The nature of liver space occupying remains to be investigated: primary liver cancer?	None	The surface of liver is smooth, and a high-density mass shadow can be seen in liver S7, with clear boundary	None	1	1	1	62.0	2	9	81.1	35.7	None	8.8	1.6	16.66	74.1	16	4.7	4.9	0.3	0	12.33	2.67	0.79	0.82	0.05	0	4.06	102	34.8	85.7	293	25.1	41.9	13.3	527	9.6	10.3
Y043	60	1	male	Minimally invasive interventional Department	2018-08-2910:31:00	0	0	0	0	1	1. liver space occupying: liver tumor rupture and hemorrhage?; 2. anemia; 3. hepatitis B virus carrying status	None	External hospital	None	4	0	1	62.0	2	46	59.7	36.3	None	23.9	5.2	8.92	76.6	12.9	10.1	0.1	0.3	0	6.83	1.15	0.9	0.01	0.03	0	2.42	83	24.5	101.2	339	34.3	48.6	13.1	119	10.3	10.9
Y044	47	1	male	Minimally invasive interventional Department	September 7, 2018 10:12:00	0	0	0	0	0	Hepatic hemangioma	None	Massive and patchy slightly low-density shadows can be seen in the upper segment of the right lobe and the left outer lobe of the liver, and the larger one is located in the right lobe of the liver, with a size of about 73 × 61mm, and patchy lower density shadows can be seen inside. There are two quasi circular low-density shadows under the capsule of the right lobe of the liver, with clear bound…	The surface of liver is smooth and the proportion of each lobe is uniform; Multiple round like abnormal signal shadows were seen in the liver, showing low T1WI, high t2spair and high DWI signals, with uniform internal signal and clear boundary; The larger one is located in the right anterior lobe of the liver, with a size of about 64mm*70mm*74mm; Contrast enhanced scan showed that smaller lesions…	4	0	1	73	2	15	60	37.4	None	12.6	1.9	7.17	58.9	32.2	6	2.1	0.8	0	4.22	2.31	0.43	0.15	0.06	0	4.84	139	43.9	90.7	317	28.7	43	13.1	304	10.7	12.4
Y045	50	1	male	Minimally invasive interventional Department	2018-10-1710:15:00	0	0	0	0	1	1. right lobe of liver: liver cancer? 2. chronic viral hepatitis B	None	External hospital	None	4	0	1	62.0	2	13	63.8	37.6	None	32.5	6.5	8.48	40.8	30.7	12.1	15.3	1.1	14.7	3.46	2.6	1.03	1.3	0.09	1.25	4.55	99	31.5	69.2	314	21.8	43.5	20.3	249	12.3	19.8
Y048	43	1	male	Hepatobiliary pancreatic surgery	2018-11-1309:28:00	0	0	0	0	0	1. Liver space occupying lesions: biliary cystadenoma?; 2. Protuberant lesions of gallbladder: gallbladder adenomyosis?	None	A cystic solid abnormal density shadow with a size of about 20mm × 19mm × 16mm can be seen at the hepatic margin of liver S2, showing slightly low-density shadow and uneven density, with a CT value of about 25-50hu. The central part of the lesion shows isodense shadow, and the edge shows multiple small capsules. The plain scan boundary is not clear. The solid components in the lesion can be signi…	None	1	1	0	20	1	74	74.3	43.1	None	14.6	2.8	5.82	54.5	32.6	11.2	1.2	0.5	0	3.17	1.9	0.65	0.07	0.03	0	7.42	147	48.8	65.8	301	19.8	36.8	18.6	280	10.7	12.4
Y049	46	1	male	Minimally invasive interventional Department	2018-12-0110:30:00	1	0	0	0	0	1. The nature of liver space occupying lesions remains to be investigated: liver cancer? 2. Liver cirrhosis 3. Gallstone	The shape and size of the right lobe of the liver were normal; The left lobe of the liver has abnormal morphology, increased volume, slightly thickened and enhanced echo of the liver parenchyma, blunted front end of the liver margin, and multiple isoechoic masses can be seen in it, which are fused with each other, with a large range of about 135 × 75mm, irregular shape, clear boundary, no envelop…	None	The liver morphology is irregular, the left outer lobe volume is reduced, the liver margin is uneven, the widening of liver fissure is not obvious, a mass of massive abnormal signal shadow can be seen in the left outer lobe of the liver, T1WI shows low signal, T2WI shows high and slightly high signal, high b value on DWI shows high signal, ADC image shows low signal, the range is about 69 × 117 ×…	4	0	1	135	2	75	75	39.9	None	16.4	4	4.52	44.3	41.8	9.1	4.4	0.4	0	2	1.89	0.41	0.2	0.02	0	4.35	137	39.3	90.3	349	31.5	40.3	12.3	128	9.9	10.8
Y050	48	1	male	Hepatobiliary pancreatic surgery	2018-12-1111:07:00	0	0	0	0	0	Space occupying lesions of liver	External hospital	None	None	4	0	1	62.0	2	42	67.4	39.7	None	16.5	3.1	5.76	63.1	24	9.9	2.3	0.7	0	3.64	1.38	0.57	0.13	0.04	0	5.12	158	47	91.8	336	30.9	41.1	12.1	258	10.4	11.6
Y051	53	1	male	Minimally invasive interventional Department	2018-12-1611:23:00	0	0	0	0	1	1. intrahepatic nodules: cirrhotic nodules? Liver cancer?; 2. hepatitis cirrhosis (compensatory phase) chronic viral hepatitis B; 3. liver cyst; 4. gallstone; 5. chronic superficial atrophic gastritis with erosion; 6. kidney stones; 7. proctitis	The shape of the liver section was abnormal, the volume was reduced, the surface of the liver envelope was wavy, the front end of the liver margin became blunt, and the echo in the liver was thickened and enhanced, with uneven distribution. Several slightly hyperechoic nodules can be seen in the liver, the larger one is about 7 × 7mm, the boundary is clear, and the internal echo is still uniform.…	The size and morphology of the liver were acceptable, and the local surface showed fine wavy appearance. A low-density shadow with a size of about 2 × 3mm was seen in the S5 segment of the liver, and no enhancement was seen after enhancement; No obvious abnormal density shadow or enhancement shadow was found in the remaining liver parenchyma. The main portal vein was widened with a diameter of 15…	The surface of the liver is smooth, and the proportion of each lobe is uniform. Round like long T1 long T2 signal shadow can be seen in S4 and 5, with a diameter of about 3mm; No abnormal signal shadow and abnormal enhancement were found in the remaining liver parenchyma. The blood vessels in the liver are evenly distributed and natural, without stenosis or filling defect; The spleen was not enla…	1	1	0	7	1	28	66.4	38.4	None	7.8	1.4	8.45	53.5	37.2	5.8	3.1	0.4	0	4.53	3.14	0.49	0.26	0.03	0	4.88	152	43.7	89.5	348	31.1	44.2	13.4	248	10.1	11.7
Y052	63	0	female	Minimally invasive interventional Department	2018-12-2309:57:00	0	0	0	0	0	1. liver nodules: small liver cancer? 2. cryptogenic cirrhosis decompensated esophageal varices (severe) portal hypertensive gastropathy hypersplenism 3. gallstone and cholecystitis 3. multiple polyps of gallbladder 4. peripheral vascular atherosclerosis 5. abnormal glucose tolerance	The shape and size of the liver section are normal, the surface of the liver envelope is not smooth, the echo in the liver is thickened and enhanced, and the distribution is uneven. A strong echo spot with a size of about 6 × 4mm can be seen in the right lobe of the liver, and the rear sound shadow is not obvious.	The surface of liver is less smooth than before; A kind of circular low-density shadow was newly seen in S4 of liver, with a diameter of about 16mm. Small patchy enhancement was seen in the center of the lesion on enhanced scan, and it was slightly obvious in arterial phase. The blood vessels in the liver were clearly displayed, and small calcifications were seen in S8, the same as before; There …	The liver morphology was irregular, the liver margin was uneven, the liver fissure was widened, and the left outer lobe and caudal lobe of the liver were enlarged; A kind of circular short T1 and slightly long T2 signal can be seen in S4. Most of the T1 lipid pressure lesions have significantly reduced signal, and high signal is still seen in the center. DWI shows slightly high signal, and the le…	4	0	0	6	1	20	63	31.9	None	14.9	4	1.47	49	35.4	12.9	2	0.7	0	0.72	0.52	0.19	0.03	0.01	0	3.11	112	31.2	100.3	359	36	50.8	14	47	11.2	11.4
Y053	61	1	male	Hepatobiliary pancreatic surgery	2019-01-0309:40:54	0	0	0	0	1	Hepatic space occupying lesions	The morphology of the liver section is abnormal, the surface of the liver capsule is smooth, and the echo distribution in the liver is uneven. A substantial mass can be seen in the caudate lobe, about 47 × 46mm in size, quasi circular in shape, medium echo in the interior, uneven distribution, unclear boundary, protruding outside the liver capsule, no obvious sound halo around, and the surroundin…	None	None	1	1	0	47	2	32	62.8	40.2	None	11.1	2.1	5.75	53.7	33.4	9.4	2.6	0.9	0	3.09	1.92	0.54	0.15	0.05	0	4.42	133	41.2	93.2	323	30.1	44.2	13	205	10.8	12.7
Y055	47	1	male	Hepatobiliary pancreatic surgery	2019-01-2911:05:08	0	0	0	0	1	Hepatic space occupying lesions	The shape and size of the liver section are normal, the echo of the capsule is regular, the echo light spots of the liver parenchyma are thickened and enhanced, and the distribution is uneven. A hypoechoic mass with a size of about 25 × 23mm can be seen at the second porta hepatis, which is quasi circular in shape, uneven in internal echo, clear in edge, close to the middle and right hepatic vein…	The liver surface is smooth, the proportion of liver lobes is coordinated, the liver fissure is not wide, a kind of circular slightly low-density shadow can be seen in the liver S8, the edge is not clear, the size is about 17 × 20 × 22mm, the plain CT value is about 32hu, the enhanced scan lesions are more obvious than the upper part, the CT value is 68hu, the lower CT value is about 35hu, the le…	None	3	0	0	22	1	17	60.6	37	None	7.7	1.7	6.86	68.6	22.4	7.4	1.5	0.1	0	4.7	1.54	0.51	0.1	0.01	0	4.78	143	43.2	90.4	331	29.9	42.1	12.6	206	11.6	14.6
Y056	56	1	male	Minimally invasive interventional Department	2019-02-1310:02:30	1	0	0	0	0	Hepatic space occupying lesions	None	On February 3, 2019, abdominal enhanced CT in Xiangya Hospital of Central South University: mass in caudate lobe of liver (8.8 × 10.7cm), and small intrahepatic nodules	None	1	1	1	107	2	27	66.1	39.5	None	10.6	2.5	5.52	58.6	22.6	11.6	6.7	0.5	0	3.23	1.25	0.64	0.37	0.03	0	4.74	149	45.5	96	327	31.4	43.8	12.3	232	10.2	11.2
Y057	45	1	male	Hepatobiliary pancreatic surgery	2019-02-2111:39:05	0	1	0	0	1	Hepatic space occupying lesions	The shape of the liver section is normal, the volume is not significantly reduced, the surface of the liver envelope is not smooth, the echo in the liver is slightly thickened, and the distribution is still uniform. A hypoechoic mass can be seen next to the gallbladder in S4 segment of the liver, which protrudes under the capsule locally, about 47 × 34mm in size, oval like, with clear boundary an…	The liver surface is smooth, the proportion of liver lobes is coordinated, the liver fissure is not wide, a kind of round soft tissue mass shadow can be seen under the S4 capsule of the liver, the size is about 47 × 40 × 41mm, and the CT value is about 51hu. After enhancement, the early lesions of the artery show patchy enhancement, and the CT value is about 113hu. In the arterial phase, the bran…	None	1	1	1	47	2	31	64.5	42.3	None	17.8	3.9	6.08	59.2	30.9	6.6	3	0.3	0	3.6	1.88	0.4	0.18	0.02	0	5.05	150	47.1	93.3	318	29.7	43.9	12.9	154	11.6	15.4
Y060	60	1	male	Hepatobiliary pancreatic surgery	2019-03-1509:37:09	0	0	0	0	1	Hepatic space occupying lesions	The morphology of the liver section is basically normal, the surface of the liver capsule is smooth, and the echo distribution in the liver is uneven. A hypoechoic mass can be seen in the S8 of the liver, about 36 × 22mm in size, oval in shape, with different intensity echo in the interior, uneven distribution, unclear edge, no change in the rear echo, no satellite nodules, and the blood vessels …	None	None	1	1	0	36	2	15	65.5	39.1	None	10.1	1.9	7	66	24	8.4	1.3	0.3	0	4.62	1.68	0.59	0.09	0.02	0	4.09	126	39.2	95.8	321	30.8	42.4	12.2	199	12	15.1
Y061	48	0	female	Hepatobiliary pancreatic surgery	2019-03-1509:56:35	1	0	0	0	0	1. hepatic hemangioma 2. appendicitis after operation.	The shape of the visceral section is abnormal, and the echo in the liver is uneven. A slightly hyperechoic area can be seen in the right lobe of the liver, about 10 × 10mm in size, quasi circular in shape, hyperechoic inside, uneven distribution, clear boundary, regular edge, no change in the rear echo, and no displacement of the blood vessels in the liver. The shape and size of gallbladder secti…	Each lobe of the liver is of normal size and morphology, with smooth edges. Several oval like slightly low-density shadows can be seen in the liver, and the boundary is not clear. The larger one is located in the right lobe, with a size of about 93mm × 61mm, and its internal density is not uniform. Nodular and nodular enhancement can be seen at the edge of the lesion in the arterial phase, and th…	None	4	0	1	93	2	19	76.8	47.8	None	18.3	3.3	7.06	49.2	39.7	8.1	2.4	0.6	0	3.48	2.8	0.57	0.17	0.04	0	4.86	154	44.7	92	345	31.7	39.8	11.9	256	11.7	15.3
Y063	25	0	male	Hepatobiliary pancreatic surgery	2019-03-1710:30:53	0	0	0	0	0	Space occupying lesions in the right lobe of the liver	None	The liver surface is smooth, the proportion of liver lobes is coordinated, the parenchymal density is reduced, the CT value is about 16hu, a kind of circular soft tissue density mass can be seen in the S6 segment of the liver, the size is about 77 × 86 × 87mm, the boundary is clear, the plain scan density is mostly uniform, the CT value is about 45hu, a few punctate calcifications can be seen, th…	None	1	1	1	87	2	43	72.7	43.9	None	7.9	1.5	7.79	47.9	41.3	7.8	2.1	0.9	0	3.73	3.22	0.61	0.16	0.07	0	4.59	143	42.5	92.6	336	31.2	39.8	11.7	274	8.4	8.2
Y064	74	1	male	Hepatobiliary pancreatic surgery	2019-03-1809:31:00	0	1	0	0	0	Hepatic space occupying lesions	The morphology of the liver section was normal, the volume was normal, the surface of the liver envelope was not smooth, the echo of the liver parenchyma was thickened and enhanced, and the distribution was uneven, showing large mesh changes, the inner diameter of the main portal vein was about 11mm, the wall was thickened, and the echo was enhanced. A hypoechoic mass with a size of about 38 × 25…	The shape and size of the liver are normal, the surface is smooth, the proportion of liver lobes is normal, the liver fissure is not widened, a slightly low-density mass shadow, about 34 × 22mm in size, the boundary is clear, the density is relatively uniform, the CT value is about 45-50hu, the enhanced arterial phase is irregular and significantly enhanced, the CT value is about 110hu, the enhan…	None	1	1	1	38	2	17	78.1	43.5	None	9.4	2.1	4.19	54.6	28.2	13.6	2.6	1	0	2.29	1.18	0.57	0.11	0.04	0	3.48	116	34.7	99.7	334	33.3	51.1	14.1	209	11.4	13.5
Y066	30	0	male	Hepatobiliary pancreatic surgery	2019-03-2209:55:26	0	1	0	0	0	Hepatic space occupying lesions	The shape of the liver section is normal, the volume is not large, the echo distribution in the liver is uneven, the first half is slightly thickened and enhanced, the second half is slightly sparse and attenuated, the intrahepatic pipeline structure is not clear, and the extrahepatic surface still exists. A mixed echo mass dominated by low echo can be seen in the right lobe of the liver, about 5…	The density inhomogeneity of liver parenchyma was reduced, the CT value was about 47hu, a mass of slightly high-density shadow could be seen in the right lobe, the boundary was unclear, the range was about 72 × 51mm, obvious enhancement could be seen in the arterial phase of enhanced scan, small patchy low-density shadow could be seen in the center, the portal phase and delayed phase continued to…	The liver capsule was not smooth, and the volume of the left outer lobe was slightly increased. The signal of liver parenchyma is not uniform. An abnormal signal focus with a size of 55 × 47 × 55mm can be seen at the junction of s5/6, showing low T1WI, high t2spair, and high DWI signals. The boundary is relatively clear. The lesions are significantly abnormal enhanced in the early dynamic enhance…	1	1	0	54	2	34	69.6	45.9	None	24.1	4.1	5.54	65.5	24.9	7.8	1.3	0.5	0	3.63	1.38	0.43	0.07	0.03	0	5.04	153	42.9	85.1	357	30.4	37.2	12.2	211	11.3	14.3
Y068	26	0	male	Hepatobiliary pancreatic surgery	2019-03-2509:55:46	0	0	0	0	0	Hepatic cyst	The morphology of the liver section is normal, and the echo distribution in the liver is uneven. An anechoic area can be seen in the right posterior lobe of the liver, with a size of about 86 × 75mm and a quasi circular shape. The interior is an anechoic dark area, with a clear boundary, thin wall, and enhanced echo in the rear. A strong echo spot can be seen at the edge of the capsule wall, with…	A huge round low-density shadow can be seen between the right lobe of the liver and the kidney, with a larger slice range of about 82mm × 69mm, and a CT value of about 15hu. A punctate dense shadow with a diameter of about 2mm can be seen at the edge of the lesion. No enhancement is seen after enhancement, and the size is the same as before. The right adrenal gland is not clearly displayed. A pun…	None	2	0	1	86	2	27	79.7	47.2	None	25.3	4.4	4.97	39	50.1	8.7	1.6	0.6	0	1.94	2.49	0.43	0.08	0.03	0	5.92	184	53	89.5	347	31.1	37.1	11.5	211	8.8	9.9
Y071	65	0	female	Hepatobiliary pancreatic surgery	2019-03-3010:21:00	0	0	0	0	0	Giant cyst in the right lobe of liver	The shape of the liver section is normal, and the echo distribution in the liver is uneven. An anechoic area can be seen in the right lobe of the liver, about 95 × 82mm in size, oval in shape, and an anechoic area inside, with clear boundary, thin wall, and enhanced echo in the rear. The structure of intrahepatic duct was clearly displayed, and the inner diameter of portal vein was not wide.	None	None	1	1	1	95	2	21	59.4	39	None	11.4	2.2	4.48	67.9	21.9	5.1	4.2	0.9	0	3.04	0.98	0.23	0.19	0.04	0	4.25	122	37.5	88.2	325	28.7	43.8	13.6	168	12	14.6
Y072	45	0	female	Hepatobiliary pancreatic surgery	2019-04-0109:48:09	0	0	0	0	0	Liver space occupying: liver cyst?	The shape and size of the liver section are normal, the echo of the envelope is regular, and the echo of the liver parenchyma is punctate medium echo, evenly distributed. Two patchy hypoechoic areas can be seen under the envelope of the right lobe of the liver, with the range of about 41x21mm and 33 × 18mm respectively. The shape is irregular, the boundary is still clear, and the internal echo is…	The shape and size of the liver are normal, the surface is smooth, the proportion of liver lobes is normal, the liver fissure is not widened, multiple circular low-density shadows of different sizes can be seen in the left and right liver lobes, the larger one is located in the right lobe of the liver, the size is about 73 × 85 × 70mm, the CT value is about 3hu, and no obvious enhancement is seen…	None	4	0	1	85	2	12	66	39.5	None	13.1	2.1	5.53	53.7	35.3	8.9	1.4	0.7	0	2.97	1.95	0.49	0.08	0.04	0	4.08	118	35.2	86.3	335	28.9	39.5	12.6	288	9.5	10.1
Y073	70	0	female	Hepatobiliary pancreatic surgery	2019-04-0209:23:25	0	0	0	0	0	Hepatic space occupying lesions	The shape and size of the liver section are normal, the echo of the envelope is regular, the echo of the liver parenchyma is punctate medium echo, and the distribution is uniform. No obvious stones and mass echo are found in the liver. The main portal vein is not wide. The gallbladder has been removed. The inner diameter of the upper segment of the common bile duct is 11mm, the middle and lower s…	In the left lobe of the liver, a large uneven low-density shadow with ill defined boundary can be seen, and a quasi circular high-density shadow can be seen inside. After enhancement, a circular uneven mild delayed enhancement can be seen, the size is about 71 × 34 × 40mm, and the left branch of the portal vein is involved; Round like slightly high-density shadow can be seen in the right abdomina…	None	1	1	0	71	2	11	61.4	38	None	9.9	2	5.61	48.9	40.1	6.4	3.4	1.2	0	2.74	2.25	0.36	0.19	0.07	0	3.89	123	37	95.1	332	31.6	46.1	13.2	234	11	12.3
Y078	38	0	female	Minimally invasive interventional Department	2019-04-0910:25:24	0	0	0	0	0	Hepatic hemangioma	External hospital, lesion 103*72mm	None	None	4	0	1	103	2	9	64.6	38.3	None	12.8	2.8	4.12	46.9	39.6	8.7	4.1	0.7	0	1.93	1.63	0.36	0.17	0.03	0	4.18	123	36.5	87.3	337	29.4	40.3	12.7	188	10.4	11
Y083	61	1	male	Hepatobiliary pancreatic surgery	2019-04-2110:07:10	1	0	0	0	1	Hepatic space occupying lesions	The shape of the liver section is abnormal, the volume is reduced, the surface is not smooth, the echo of the liver parenchyma is uneven, thickened and enhanced, a slightly hypoechoic nodule can be seen in the S6 segment of the liver, the size is about 24 × 19mm, the shape is irregular, the boundary is not clear, CDFI: a few punctate blood flow signals can be seen inside. Multiple anechoic nodule…	None	None	4	0	0	24	1	18	60.8	30.3	None	16.5	3.5	5.31	43.6	44.3	9	2.3	0.8	0	2.32	2.35	0.48	0.12	0.04	0	4.83	154	44.2	91.5	348	31.9	41.9	12.4	168	10.5	11.5
Y086	56	0	female	Hepatobiliary pancreatic surgery	2019-05-0809:54:44	0	0	0	0	0	Hepatic space occupying lesions	The morphology of the liver section is basically normal, the surface of the liver envelope is smooth, and the echo distribution in the liver is uneven. An echo free area with a size of about 10 × 5mm can be seen in the left outer lobe of the liver, and the boundary is still clear. A substantial mass with a size of about 21 × 19mm can be seen in the left inner lobe of the liver, which is irregular…	None	None	2	0	1	21	1	22	74.8	43.5	None	10.9	1.5	6.09	53.1	39.6	4.4	2.1	0.8	0	3.23	2.41	0.27	0.13	0.05	0	4.28	125	39.1	91.4	320	29.2	41.5	12.6	204	9.6	10.5
Y087	48	1	male	Minimally invasive interventional Department	2019-05-1010:07:15	0	0	0	0	0	Hepatic hemangioma	The shape and size of the liver section are normal, and the echo in the liver is uneven. Two parenchymal mass echoes can be seen in the upper segment of the left outer lobe of the liver, about 24 × 21mm and 12 × 10mm in size respectively. The shape is quasi circular, the distribution is uneven, the boundary is clear, the edge is regular, the echo in the rear is unchanged, and the blood vessels in…	The liver surface is smooth, the proportion of liver lobes is coordinated, the liver fissure is not wide, multiple quasi circular low-density shadows can be seen in the left lobe of the liver, the larger one has a cross-sectional area of about 22mm × 22.5MM, and the enhanced scan shows filling enhancement. There is no dilatation of the intrahepatic and extrahepatic bile ducts, the gallbladder is …	None	4	0	1	24	1	12	68.5	41.9	17	18.8	3.2	5.41	48.2	40.3	6.3	4.6	0.6	0	2.61	2.18	0.34	0.25	0.03	0	4.91	155	47	95.7	330	31.6	45.2	13.1	204	9	9.9
Y090	54	0	female	Hepatobiliary pancreatic surgery	2019-05-2109:55:17	0	0	0	0	0	Hepatic hemangioma	None	The surface of the liver is smooth, and the proportion of each lobe is uniform. The lower segment of the left outer lobe of the liver can see a quasi circular dispersion shadow, part of which protrudes beyond the liver contour, with clear boundary and uniform density. The CT value is about 46hu, and the size is about 11 × 40mm. The surrounding of the mass in the arterial phase of enhanced scan is…	None	2	0	1	40	2	15	73.6	44	None	9	1.2	7.36	61.6	28	7.2	2.7	0.5	0	4.53	2.06	0.53	0.2	0.04	0	4.18	121	37.7	90.2	321	28.9	43.3	13.1	239	11.4	14
Y092	54	0	female	Hepatobiliary pancreatic surgery	2019-05-2710:16:11	0	0	0	0	0	Hepatic cyst	None	The liver surface was smooth, and a quasi circular low-density shadow with a size of about 164 × 143 × 141mm was seen in the right lobe of the liver. The edge was clear, and there was a fine separation inside. No enhancement was seen in the enhanced scan; No abnormal density foci and abnormal enhancement signs were found in the remaining livers. There was no dilatation of the intrahepatic and ext…	None	1	1	1	164	2	20	64.5	38.7	None	14.2	2.6	4.72	58.7	28.6	8.9	3.4	0.4	0	2.77	1.35	0.42	0.16	0.02	0	4.05	126	38.2	94.3	330	31.1	42.7	12.5	85	14.9	21.7
Y095	54	0	female	Hepatobiliary pancreatic surgery	2019-06-1009:49:53	0	0	0	0	0	Multiple cysts of liver	The shape of the liver section is normal, the echo distribution in the liver is uneven, and multiple anechoic areas can be seen in the liver, the larger ones are about 89 × 77mm (left) and 51 × 40mm (right), the shape is quasi circular, and the interior is an anechoic area, with clear boundary, thin wall, and posterior echo enhancement. The intrahepatic duct structure was clearly displayed	The size and morphology of the liver were normal, and the edges were smooth. Multiple circular low-density shadows of different sizes were seen in the left and right liver lobes. The largest one was located in the left outer lobe, with a size of about 69 × 79mm, CT value of about 5-8hu, and the boundary was clear. There was no enhancement sign in multiphase scanning after enhancement; There are s…	None	4	0	1	89	2	17	71.3	44	None	6.3	1	5.55	48.5	38.7	5.8	6.1	0.9	0	2.69	2.15	0.32	0.34	0.05	0	4.25	124	39	91.8	318	29.2	48.1	14.4	216	10.5	11.3
Y097	43	0	female	Hepatobiliary pancreatic surgery	2019-06-2509:57:11	0	0	0	0	0	Hepatic space occupying lesions	None	None	The size and morphology of the liver are normal, and scattered multiple circular slightly long T1 and T2 signal shadows of different sizes can be seen in the liver. Some lesions on DWI are hyperintense, and some lesions have a tendency of fusion, with a diameter of about 5-15mm. The enhancement of lesions in arterial phase is not obvious on enhanced scanning, and spotted and nodular enhancement c…	4	0	0	15	1	9	58.6	38.1	None	9.4	2.1	3.5	47.3	40.9	6.9	4	0.9	0	1.66	1.43	0.24	0.14	0.03	0	3.34	104	32	95.8	325	31.1	44.4	12.8	222	11.7	14.3
Y098	57	1	male	Hepatobiliary pancreatic surgery	2019-06-2810:04:40	0	0	0	0	1	Hepatic space occupying lesions	The shape and size of the liver section were basically normal, and the envelope was uneven. The echo in the liver is thickened and unevenly distributed. A hyperechoic mass can be seen under the S6 capsule of the liver, with a size of about 14 × 11mm, slightly irregular shape, uneven internal echo, clear boundary, regular edge, no change in the rear echo, and no displacement of the blood vessels i…	None	None	4	0	1	14	1	33	79.3	39.6	None	28.1	4.1	4.53	43.7	40.2	11.3	4.4	0.4	0	1.98	1.82	0.51	0.2	0.02	0	4.94	164	46.8	94.7	350	33.2	43.5	12.5	133	11.3	14.1
Y102	34	0	male	Hepatobiliary pancreatic surgery	2019-07-0510:32:14	0	0	0	0	0	Hepatic space occupying lesions	The shape and size of the liver section are normal, and the echo in the liver is uneven. A low echo mass with a size of about 55 × 41mm can be seen in the S5 of the right lobe of the liver. The shape is quasi circular, the internal echo is uneven, the boundary is clear, the edge is regular, the rear echo has no change, and the intrahepatic blood vessels can be seen in it. CDFI: a little blood flo…	None	None	1	1	1	55	2	9	62.9	42.3	None	14.7	3	3.82	57.6	29.8	8.6	3.7	0.3	0	2.2	1.14	0.33	0.14	0.01	0	4.8	145	43	89.6	337	30.2	40.1	12.1	186	11	13.9
Y105	39	0	female	Hepatobiliary pancreatic surgery	2019-07-1609:46:27	0	0	0	0	0	Hepatic space occupying lesions	The morphology of the liver section is basically normal, the surface of the liver envelope is smooth, the echo distribution in the liver is uneven, a substantial mass can be seen in the right lobe of the liver, the size is about 74 × 59mm, the shape is irregular, the interior is hypoechoic, the distribution is uneven, the edge is not clear, the rear echo has no obvious change, the surrounding sou…	The liver size was normal, the right lobe of the liver was irregular locally, and a strip-shaped low-density shadow was seen, and a large piece of low-density shadow was seen in the right lobe of the liver, with 35hu plain scan, uneven enhancement at the edge of enhanced scan, and no obvious enhancement in the center; Intrahepatic bile duct dilatation. The gallbladder wall is thickened, and a pat…	None	1	1	0	74	2	132	62.6	38.4	None	16.9	5.9	3.3	52.4	30	5.5	11.5	0.6	0	1.73	0.99	0.18	0.38	0.02	0	3.93	124	38.7	98.5	320	31.6	52.8	14.5	161	10.6	12.2
Y106	64	1	male	Hepatobiliary pancreatic surgery	2019-07-1610:13:50	1	0	0	0	1	Hepatic space occupying lesions	None	The surface of the liver is slightly less smooth, the upper segment of the right anterior lobe of the liver can see a lumpy mass shadow, the boundary is clear, the range is about 60 × 52 × 53mm (anteroposterior diameter × transverse diameter × high diameter), the density is slightly less uniform, a few patchy slightly low-density shadows can be seen in the center, the CT value is about 45-53hu, t…	None	1	1	1	60	2	9	61.3	36.1	None	8.9	2.4	6.29	56.1	28	10.2	4.9	0.8	0	3.53	1.76	0.64	0.31	0.05	0	4.31	133	42.1	97.7	316	30.9	49.4	13.5	291	10.8	12.7
Y109	37	0	female	Hepatobiliary pancreatic surgery	2019-07-2209:39:19	0	0	0	0	0	Hepatic space occupying lesions	The shape and size of the liver section are normal, and the echo in the liver is uneven. A slightly hyperechoic mass can be seen in the left lobe of the liver (S2 segment), about 49 × 37mm in size, oval in shape, with uneven internal echo, clear boundary, regular edge, no change in the rear echo, and no displacement of the blood vessels in the liver. CDFI: streaky blood flow signal can be seen in…	None	None	1	1	1	49	2	24	65.4	38.7	None	12.6	2.6	7.56	75.7	13.1	7.1	3.8	0.3	0	5.72	0.99	0.54	0.29	0.02	0	3.35	97	32.3	96.4	300	29	44.1	12.4	173	10.3	11.9
Y110	30	0	female	Minimally invasive interventional Department	2019-07-2309:32:25	0	0	0	0	0	1. hepatic hemangioma; 2. after uterine polyp surgery	The shape and size of the liver section are normal, the echo in the liver is uneven, several hyperechoic nodules can be seen in the liver, the larger one is located in the left outer lobe, the size is about 50 × 45mm, the shape is irregular, the boundary is clear, the edge is regular, the echo in the rear is unchanged, and the blood vessels in the liver are not displaced.	None	None	4	0	1	50	2	7	58.8	37.5	None	37.5	6	6.31	56.7	31.4	6.5	4.9	0.5	0	3.58	1.98	0.41	0.31	0.03	0	4.85	100	32.8	67.6	305	20.6	36.9	15.7	321	12.4	20.6
Y111	65	1	male	Hepatobiliary pancreatic surgery	2019-07-2310:04:08	0	0	0	0	0	Hepatic space occupying lesions	None	Plain scan showed that the liver volume was not large, the local liver surface of the left and right lobes of the liver was rough and uneven, the liver fissure was not clearly widened, and the proportion of each lobe was basically normal; Mass like low-density shadow can be seen at the liver edge of s8/5 across the liver, protruding outward from the liver capsule by about 63 × 53 × 54mm (section …	None	1	1	0	80	2	30	68.7	38.2	None	15.2	3.3	4.44	57.8	28.2	11.9	1.6	0.5	0	2.57	1.25	0.53	0.07	0.02	0	4.12	127	38.9	94.4	326	30.8	47	13.3	143	11.4	12.6
Y114	64	0	female	Minimally invasive interventional Department	2019-08-0910:06:15	0	0	0	0	0	1. Liver cysts; 2. Hypothyroidism; 3. Diabetes mellitus; 4. Hyperlipidemia	The shape and size of the liver section are normal, the echo in the liver is uneven, the pre field echo of the liver parenchyma is enhanced, the light spots are fine, the post field echo is slightly attenuated, the out of liver surface is visible, the display of the pipeline structure is slightly unclear, and an echo free area can be seen in the liver, a larger one is about 90 × 74mm (right poste…	None	None	4	0	0	90	2	20	64.6	41.1	None	21.5	3	4.96	56	35.1	7.7	0.6	0.6	0	2.78	1.74	0.38	0.03	0.03	0	4.85	154	47	96.9	328	31.8	48.6	13.6	218	10.1	11.4
Y116	51	1	male	Hepatobiliary pancreatic surgery	2019-08-1209:48:16	0	0	0	0	1	Hepatic space occupying lesions	The shape of the liver section is normal, and the echo distribution in the liver is uneven. A slightly hyperechoic mass with a size of about 30 × 28mm can be seen in the right anterior lobe of the liver. The shape is still regular, the boundary is not clear, and the echo is uneven. CDFI: streaky blood flow signal can be seen in the mass. An anechoic area can be seen in the right anterior lobe of …	None	The surface of liver is smooth and the proportion of each lobe is uniform; An irregular abnormal signal focus was found in S8 of liver, which was slightly hypointense on T1WI and slightly hyperintense on t2-spair. The size of the lesion was about 23.6mm × 18.1mm, and the boundary was unclear; Prometaxel showed obvious enhancement in arterial phase, continuous enhancement in the edge of the lesion…	2	0	0	30	1	13	64.5	37.8	None	14.9	2.6	4.17	44.6	42	10.3	2.4	0.7	0	1.86	1.75	0.43	0.1	0.03	0	5.41	115	37.4	69.1	307	21.3	37.1	15.3	158	12.8	18.9
Y119	30	0	female	Hepatobiliary pancreatic surgery	2019-08-1310:31:49	0	0	0	0	0	Hepatic space occupying lesions	The shape and size of the liver section are normal, and the echo in the liver is uneven. An isoechoic mass with a size of about 65 × 46mm can be seen at the lower edge of the right lobe of the liver. The shape is irregular, the boundary is unclear, the internal echo is uneven, the rear echo is unchanged, and the blood vessels in the liver are not displaced. CDFI: abundant blood flow signals can b…	An exophytic round like mass can be seen at the lower edge of the right lobe of the liver, with smooth edges and a size of about 6.5cm × 6.0CM × 4.9cm. It is isodense on plain scan, with a CT value of 50hu and uniform density. It is significantly enhanced in the arterial phase on dynamic contrast-enhanced scan, with a CT value of about 128hu. A strip-shaped low-intensity focus can be seen in the …	None	1	1	0	65	2	16	77.5	43.8	None	8.9	1.5	4.79	44.7	47.8	5.6	1.7	0.2	0	2.14	2.29	0.27	0.08	0.01	0	4	117	35.4	88.5	331	29.3	39.2	12	224	11.4	14.9
Y122	39	0	male	Hepatobiliary pancreatic surgery	2019-08-2009:25:17	0	0	0	0	0	Hepatic space occupying lesions	The shape and size of the liver section are normal, and the echo in the liver is uneven. Two slightly hyperechoic masses can be seen in the liver, about 33 × 28mm in size (left outer lobe) and 16 × 15mm in size (right posterior lobe), and the shape is quasi circular. The internal echo is uneven, the boundary is not clear, the edge is irregular, the rear echo is unchanged, and the blood vessels in…	None	The surface of liver is smooth and the proportion of each lobe is uniform; A class of circular abnormal signal foci can be seen in S2, with isolow signal on T1WI, isohigh signal on T2WI, and slightly high signal on DWI; The size of the lesion was about 3.3 × 3.2cm, and the boundary was not clear; After dynamic enhancement, most of the lesions were significantly enhanced in the early stage, with i…	2	0	0	33	2	18	61.1	41.3	None	18.7	3.6	5.91	48	40.6	9.5	1.4	0.5	0	2.84	2.4	0.56	0.08	0.03	0	5.43	115	36.2	66.7	318	21.2	33.5	14.6	227	12.2	15.9
Y125	30	0	female	Hepatobiliary pancreatic surgery	2019-08-2310:48:17	0	0	0	0	0	Hepatic cyst	The shape of the liver section is normal, and the echo distribution in the liver is uneven. An anechoic area can be seen in the right posterior lobe of the liver, about 74 × 67mm in size, oval in shape, and an anechoic area inside, with clear boundary, thin wall, and enhanced echo in the rear. The intrahepatic duct structure was clearly displayed.	A large class of circular low-density shadow with a size of about 75 × 69 × 64mm and a CT value of about 22hu was seen in the right liver kidney space. No enhancement was found on the enhanced scan. The boundary between the lesion and the liver and right kidney was still clear, and the right adrenal gland moved and the local boundary seemed to be unclear. The left renal parenchyma showed quasi ci…	None	1	1	1	75	2	5	59.9	40.1	None	9.2	1.6	5.59	56.1	37.4	4.8	1.3	0.4	0	3.14	2.09	0.27	0.07	0.02	0	4.04	116	36.7	90.8	316	28.7	41.1	12.4	216	11.1	13.5
Y126	36	0	male	Hepatobiliary pancreatic surgery	2019-09-0309:55:29	1	0	0	0	0	Hepatic hemangioma	The shape and size of the liver section are normal, the echo of the liver parenchyma is diffusely enhanced and unevenly distributed, the far-field echo is slightly attenuated, the out of liver surface is visible, the display of the pipeline structure is slightly unclear, and several slightly hyperechoic masses can be seen in the liver, the larger one is about 60 × 57mm (S8 segment), which is quas…	The size and morphology of each lobe of the liver are normal, the edge is smooth, a kind of oval slightly low-density shadow can be seen in the right lobe, the boundary is unclear, the size is 48 × 62mm (anteroposterior diameter × transverse diameter), and its internal density is uniform, the CT value is about 48hu, the spot like and nodular enhancement can be seen at the edge of the lesion in th…	None	4	0	0	60	2	16	63.8	40.1	None	21.6	4	5.11	51.6	36.6	9.2	1.6	1	0	2.64	1.87	0.47	0.08	0.05	0	5.04	158	47.5	94.2	333	31.3	44	12.8	240	9.5	10.3
Y127	29	0	male	Minimally invasive interventional Department	2019-09-0510:08:42	0	0	0	0	0	Hepatic hemangioma	None	The right posterior lobe of the liver was slightly swollen, the liver surface was smooth, the liver fissure was not widened, the intrahepatic density was diffusely reduced, and the CT value was about 31hu; A kind of circular slightly high-density shadow can be seen across S7 and 6 of the liver, irregular slightly low-density shadow can be seen in the center of the lesion, and the boundary is clea…	None	1	1	1	125	2	55	74.6	42	None	13.4	2.2	7.59	49.8	35	9.7	4.6	0.9	0	3.77	2.66	0.74	0.35	0.07	0	4.73	148	44.7	94.5	331	31.3	43.2	12.4	276	10.1	11.9
Y128	64	0	female	Infection department	2019-09-06, 09:20:59	0	1	0	1	0	Hepatic space occupying lesions	None	None	The surface of liver is smooth and the proportion of each lobe is uniform; A class of circular abnormal signal shadow was seen in S8 of liver, showing low T1WI, high t2spair and high DWI signals, with uniform internal signal and clear boundary; The size is about 42 × 41 × 54mm; On contrast-enhanced scan, the lesions showed obvious marginal nodular enhancement in arterial phase, gradually inward d…	1	1	1	54	2	67	83.3	41.8	80	7.5	1.3	7.6	47.3	44.6	5	2.4	0.7	0	3.6	3.39	0.38	0.18	0.05	0	3.87	113	35.8	92.5	316	29.2	42.4	12.5	256	11.1	13.3
Y129	65	1	male	Hepatobiliary pancreatic surgery	2019-09-0912:13:20	1	1	0	0	0	Hepatic space occupying lesions	The shape of the liver section is normal, the echo distribution in the liver is uneven, the first half of the liver is slightly thickened and enhanced, the second half is slightly sparse and attenuated, the intrahepatic pipeline structure is not clear, and the extrahepatic surface still exists. Multiple mixed echo areas can be seen in the liver, the larger of which is about 40 × 27mm in size (S5)…	The size and morphology of liver lobes were normal, and the edges were smooth. There were multiple cystic low-density shadows in the liver with fuzzy boundaries. The largest one was located in S5, with a size of about 44 × 47mm. Its internal density was not uniform, and the edge of the lesion was slightly enhanced in the arterial phase, with a CT value of about 50hu. The edge ring enhancement was…	None	4	0	0	47	2	59	62.3	32	None	16.1	0	8	69.5	21.3	7.1	1.6	0.5	0	5.56	1.7	0.57	0.13	0.04	0	4.3	130	38.1	88.6	341	30.2	42.2	13	252	9	9.5
Y130	22	0	female	Hepatobiliary pancreatic surgery	2019-09-1709:54:02	0	0	0	0	0	Intrahepatic space occupying: liver cyst?	None	The size and morphology of the liver are normal, and the edge is smooth. A kind of circular low-density shadow can be seen in the right anterior lobe and left outer lobe, with a size of about 110 × 89 × 102mm, a CT value of about 23hu, a clear boundary, and a few calcifications can be seen at the edge. No enhancement is seen in all phases of the enhanced scan. The adjacent hepatic arteries and ve…	None	2	0	1	110	2	98	65.1	38	None	14.8	3.3	10.47	75	15.6	8.6	0.7	0.1	0	7.86	1.63	0.9	0.07	0.01	0	4.49	95	31.5	70.2	302	21.2	36.2	14.6	208	10.7	12.4
Y131	57	1	male	Hepatobiliary pancreatic surgery	2019-09-1810:26:04	0	0	0	0	0	Multiple cysts of liver	None	The size and morphology of the liver were normal, the edges were smooth, and multiple cystic low-density shadows were seen in the liver. The CT value was about 4-10hu, and the size was about 7-90mm. The larger one was located in the right posterior lobe of the liver, and the boundary was clear. There was no enhancement sign in multiphase scanning after enhancement; The density of the remaining li…	None	4	0	1	90	2	13	60.8	40.9	None	15.8	2.8	6.99	69.2	20.5	8	1.9	0.4	0	4.84	1.43	0.56	0.13	0.03	0	4	124	37.5	93.8	331	31	42	12.1	112	12.5	15.8
Y132	48	0	female	Hepatobiliary pancreatic surgery	2019-09-1909:40:40	0	0	0	0	0	Hepatic space occupying lesions	None	None	The surface of the liver is smooth, and the proportion of each lobe is uniform. A class of circular abnormal signal foci can be seen in S2 of the liver. T1WI shows low signal, T2WI shows central low signal and edge high signal, with a size of about 30 × 22mm. The boundary is still clear, DWI shows high signal, ADC image shows low signal, the enhanced scan edge is significantly enhanced, and the p…	1	1	1	30	1	45	62.8	35	None	8.1	2	3.83	51	32.6	9.9	5.5	1	0	1.95	1.25	0.38	0.21	0.04	0	4.57	112	35.4	77.5	316	24.5	43.4	15.4	169	11.9	17.2
Y133	62	0	female	Minimally invasive interventional Department	2019-09-2410:00:28	0	0	0	0	0	Hepatic cyst	The shape and size of the liver section are normal, the echo of the capsule is regular, and the echo distribution of the liver parenchyma is not uniform. Several large cystic like structures, which are about 74.6 × 69.4mm (located in the right lobe), are seen in the liver, with clear boundaries and no clear blood flow signals. The main portal vein is not wide	The size and morphology of the liver were normal. Several oval like low-density shadows were scattered in the liver S4, S5, S7 and S8, with clear edges. The larger one was located in S8, which was larger than the previous one, about 82mm × 73mm. No obvious enhancement was found on the enhanced scan, and the density of the remaining liver parenchyma was still uniform. No abnormal enhancement shado…	None	4	0	1	82	2	18	77.3	42	None	14.9	2.7	4.66	53.5	32.4	11.8	2.1	0.2	0	2.49	1.51	0.55	0.1	0.01	0	4.19	135	41.5	99	325	32.2	46.2	12.6	237	9.7	10.2
Y134	29	0	male	Hepatobiliary pancreatic surgery	2019-09-2510:23:47	1	0	0	0	0	Hepatic space occupying lesions	The shape of the liver section is normal, the volume is not large, the echo distribution in the liver is uneven, the first half is thickened and enhanced, the second half is sparse and attenuated, the intrahepatic pipeline structure is faintly visible, and the liver surface is fuzzy. A solid hypoechoic mass with a size of about 35 × 31mm, oval, clear boundary, uneven internal echo, no obvious "ha…	None	None	1	1	1	35	2	38	69.4	41.5	None	9.7	1.6	9.25	59	33.6	4.6	2.5	0.3	0	5.45	3.11	0.43	0.23	0.03	0	5.2	149	45.9	88.3	325	28.7	43.7	13.5	251	11.7	14.2
Y136	43	0	female	Hepatobiliary pancreatic surgery	2019-10-0815:39:36	0	0	0	0	0	1. multiple space occupying lesions in the liver: Hemangioma	The shape and size of the liver section are normal, and the echo in the liver is uneven. Multiple parenchymal mass echoes can be seen in the liver, varying in size, with a maximum of 71 × 34mm. The shape is quasi circular, and the interior is hyperechoic, with uneven distribution, clear boundary, regular edge, no change in the rear echo, and no displacement of the blood vessels in the liver.	Each lobe of the liver is of normal size and morphology, with smooth edges, multiple slightly low-density shadows in the liver with uniform density. Spot like and nodular enhancement can be seen at the edge of the lesion in the arterial phase. The enhancement range in the portal phase is expanded, and the enhancement in the equilibrium phase further spreads to the center of the lesion, especially…	None	4	0	1	71	2	10	70.9	38.1	None	10.9	2.2	3.68	41.5	45.7	10.6	1.9	0.3	0	1.53	1.68	0.39	0.07	0.01	0	3.72	116	35.3	94.9	329	31.2	45	13	129	14.3	21.4
Y137	64	0	female	Hepatobiliary pancreatic surgery	2019-10-0910:14:46	0	0	0	0	0	1. multiple liver cysts 2. left kidney cysts	None	External hospital	None	4	0	1	62.0	2	17	67.9	39.5	None	7.9	1.3	7.06	44.5	48.4	4.5	1.8	0.8	0	3.13	3.42	0.32	0.13	0.06	0	3.73	117	35.8	96	327	31.4	43.8	12.4	211	9.7	10.3
Y139	55	1	male	Hepatobiliary pancreatic surgery	2019-10-0910:49:07	0	0	0	0	0	Hepatic space occupying lesions	None	The size and morphology of the liver are normal. An irregular mass of low-density shadow with a size of about 59 × 55 × 80mm can be seen in the right anterior lobe of the liver. The boundary of plain scan is unclear, the density is uneven in it, and the central patchy lower density shadow. The lesions in the arterial phase after enhancement see uneven and obvious enhancement. Multiple tortuous br…	None	1	1	0	80	2	28	78.6	41.9	None	8.9	1.8	4.41	51.8	38.1	7.3	2.3	0.5	0	2.29	1.68	0.32	0.1	0.02	0	5.11	148	45.1	88.3	328	29	40.8	12.6	225	10.6	12.3
Y142	36	0	male	Hepatobiliary pancreatic surgery	2019-10-2709:48:23	0	0	0	0	0	Giant hemangioma of right lobe of liver	The shape and size of the liver section are normal, and the echo in the liver is uneven. Two hyperechoic masses can be seen in the right lobe of the liver, with sizes of 91 × 86mm and 44 × 43mm respectively. The shape is quasi circular, and the internal echo is uneven, with clear boundaries and regular edges. There is no change in the rear echo, and no displacement of the blood vessels in the liv…	The size of the liver was normal, and two irregular slightly low-density foci were seen in the right lobe of the liver, with unclear boundaries. The sizes were 55 × 74mm and 44 × 38mm, respectively. Nodular and flocculent enhancement could be seen at the edge of the lesion in the enhanced arterial phase, and the enhancement shadow in the portal venous phase and delayed phase spread to the center.…	None	2	0	1	91	2	17	68.3	40.6	None	14.8	2.3	4.53	55.9	34.9	7.7	1.3	0.2	0	2.53	1.58	0.35	0.06	0.01	0	4.51	137	40.5	89.8	338	30.4	39.2	12	217	10.5	12.3
Y145	73	0	female	Hepatobiliary pancreatic surgery	2019-11-0410:00:35	0	0	0	0	0	Hepatic cyst	The morphology of the liver section is normal, and the echo distribution in the liver is uneven. The first half is slightly denser and enhanced, and the second half is slightly sparse and attenuated. Multiple echo free areas can be seen in the liver, the larger one is about 110 × 75mm (right lobe), which is oval in shape, with clear boundary, thin wall, and posterior echo enhancement. The intrahe…	The size and morphology of the liver were normal, the edge was smooth, and several circular low-density shadows of different sizes were seen in the liver, with diameters ranging from 3 to 101mm, and the largest one was about 101 × 78 × 108mm (anterior posterior diameter × transverse diameter × upper and lower diameter). The CT value was about 5HU, and the boundary was clear. There were no signs o…	None	4	0	1	110	2	37	61.6	39.1	None	8.2	1.4	5.02	55.3	32.7	7.8	3.2	1	0	2.78	1.64	0.39	0.16	0.05	0	4.39	134	40.6	92.5	330	30.5	45.5	13.2	147	11.1	12.9
Y146	65	1	male	Minimally invasive interventional Department	2019-11-0809:36:00	0	0	0	0	0	1. the nature of intrahepatic space occupying remains to be investigated: hepatic hemangioma? 2. intrahepatic bile duct stones	None	The liver surface is smooth, the proportion of liver lobes is coordinated, and the liver fissure is not wide; There is a punctate calcified shadow in the right posterior lobe of the liver, which is similar to that in the anterior slice; A small class of round low-density non enhancing shadow with a diameter of about 4mm can be seen in S2 of liver; There is no dilatation of the intrahepatic and ex…	The liver size is normal, the surface is smooth, and the proportion of each lobe is uniform. Small round long T1 long T2 signal with a diameter of about 5mm can be seen in liver S2, without enhancement; The signal of liver parenchyma was uniform, and no abnormal enhancement was found after dynamic enhancement; Small dot like long T1 and short T2 signals with a diameter of about 4mm can be seen at…	2	0	1	5	1	19	70.6	41.6	None	18.6	3	5.27	56.8	33	6.8	3	0.4	0	2.99	1.74	0.36	0.16	0.02	0	4.65	147	44.6	95.9	330	31.6	47	13.2	230	10	12
Y151	41	1	male	Hepatobiliary pancreatic surgery	2019-11-2610:36:12	0	0	0	0	0	Hepatic space occupying lesions	The shape and size of the liver section are normal, and the echo in the liver is uneven. A medium low echo mass can be seen in the left outer lobe of the liver, about 55 × 35mm in size, oval in shape, with uneven internal echo, clear boundary, and no change in the rear echo. CDFI: abundant blood flow signals can be seen around and inside the intrahepatic mass. The shape and size of gallbladder se…	The surface of the liver is smooth, and the proportion of each lobe is uniform. A class of circular low-density foci can be seen near the hepatic fissure in the S3 segment of the liver, with clear boundaries and uneven density. Patchy low-density shadows can be seen in the central area, with a larger section of about 44 × 53mm, which is significantly larger than the former volume. In the early st…	None	1	1	1	55	2	16	60.1	37.1	None	8.4	1.7	4.09	42	47.9	5.9	3.7	0.5	0	1.72	1.96	0.24	0.15	0.02	0	4.05	124	37	91.4	335	30.6	40.8	12.2	154	11.5	14.2
Y152	45	1	male	Hepatobiliary pancreatic surgery	2019-12-0309:28:41	1	1	0	1	1	Hepatic space occupying lesions	The morphology of the liver section was abnormal, the volume of the right lobe was reduced, the left lobe was enlarged, the surface of the liver envelope was wavy, the front end of the liver margin was blunt, the echo in the liver was thickened and enhanced, and the distribution was uneven. A hypoechoic mass, about 54 × 40mm in size, protruded outside the liver envelope, with irregular morphology…	The liver volume is reduced, the surface is wavy, the proportion of liver lobes is abnormal, the volume of the left lobe of the liver is increased, a massive isodensity shadow can be seen in the liver S3, the edge is not clear, and the local part protrudes outside the liver, the range is about 49 × 36 × 35mm (section × height diameter), the plain CT value is about 53hu, the enhanced CT scan shows…	None	1	1	0	54	2	20	65.3	32.9	None	51.9	11.8	2.58	48.8	36	10.9	3.5	0.8	0	1.26	0.93	0.28	0.09	0.02	0	3.39	119	34.7	102.4	343	35.1	45.1	11.9	54	9.9	10.2
Y153	51	0	female	Hepatobiliary pancreatic surgery	2019-12-1010:25:09	0	0	0	0	0	Hepatic cyst	The morphology of the liver section is normal, and the echo distribution in the liver is uneven. Two echo free areas can be seen in the right lobe of the liver, which are 109 × 91mm and 12 × 8mm in size, and are quasi circular in shape. The interior is an echo free area, with poor sound transmission, clear boundary, thin wall, and enhanced echo in the rear. The intrahepatic duct structure was cle…	None	None	2	0	1	109	2	10	74	41.7	None	13.4	2.1	5.05	53.1	37.2	8.1	0.8	0.8	0	2.68	1.88	0.41	0.04	0.04	0	4.28	125	38.5	90	325	29.2	41.1	12.4	179	11.3	13.8
Y154	53	0	female	Minimally invasive interventional Department	2019-12-1309:48:15	0	0	0	0	0	1. hepatic hemangioma 2. diabetes mellitus	None	The size and morphology of the liver were normal. Four quasi circular low-density foci were found in the right posterior lobe and left outer lobe of the liver, with unclear boundaries, and the larger ones were about 53 × 39mm in size	None	4	0	0	53	2	19	66.1	37.7	None	6.3	1.4	6.29	49	40.9	7.9	1.6	0.6	0	3.08	2.57	0.5	0.1	0.04	0	4.15	128	39	94	328	30.8	42.2	12.2	321	10.1	11.4
Y155	36	0	female	Minimally invasive interventional Department	2019-12-1510:01:25	0	0	0	0	0	Hepatic hemangioma	The shape and size of the liver section are normal, and the echo in the liver is uneven. A substantial mass echo can be seen in the right posterior lobe of the liver, about 45 × 40mm in size, quasi circular in shape, with hyperechogenicity in the interior, uneven distribution, clear boundary, regular edge, no change in the rear echo, and no displacement of the blood vessels in the liver.	Each lobe of the liver is as normal in size and shape, with smooth edges. A class of circular low-density shadows can be seen in S2 and 7 segments of the liver, with clear boundaries, and cross-sectional areas of about 63*50mm and 46*40mm respectively	None	2	0	1	63	2	13	73.4	43.9	None	6.8	1.1	5.03	57.2	33.6	5.6	2.6	1	0	2.88	1.69	0.28	0.13	0.05	0	3.41	74	26.3	77.1	281	21.7	53.3	19	369	10.3	11.2
Y156	37	0	male	Hepatobiliary pancreatic surgery	2019-12-1810:36:54	1	0	0	0	0	1. multiple hemangiomas of the liver 2. multiple cysts of the liver 3. cysts of the right kidney 4. double kidney stones	The shape and size of the liver section are normal, and the echo in the liver is uneven. Several slightly hyperechoic masses with different sizes can be seen in the liver, the maximum is about 93 × 71mm, the shape is oval, the internal echo is uneven, the boundary is clear, the edge is regular, the rear echo is unchanged, and the blood vessels in the liver are not displaced	An oval low-density shadow can be seen in liver S5, some of which are protruding outside the liver, the edge is not clear, and a lower density necrotic area can be seen in the center. The lesion range is about 83 × 57 × 73mm (section × height diameter). After enhancement, the edge is obviously nodular enhanced, and the continuous high-density inward filling is shown. A kind of circular low-densit…	None	4	0	1	93	2	15	68.3	40.9	None	14.5	2.6	6.21	53.6	39	6	0.8	0.6	0	3.33	2.42	0.37	0.05	0.04	0	4.59	143	43.3	94.3	330	31.2	45.8	13.2	298	9.3	10.2
Y158	57	0	female	Minimally invasive interventional Department	2019-12-2609:43:02	0	0	0	0	0	1. hepatic hemangioma 2. hypertension	The morphology of the liver section was abnormal, the volume of the left lobe was increased, the right lobe was reduced, the surface of the liver envelope was fine wavy, the front end of the liver margin was blunt, the echo in the liver was thickened and enhanced, and the distribution was uneven. A hypoechoic mass with a range of about 81 × 53 × 45mm could be seen in the left outer lobe of the li…	The liver surface is smooth, the otter tail liver, the liver fissure is not wide, a kind of circular slightly low-density shadow can be seen in the right posterior lobe and left outer lobe of the liver, the size is about 70 × 95 × 82mm and 20 × 31 × 18mm respectively, the density of the lesion in the right posterior lobe is uneven, and irregular small patchy lower density shadow can be seen in th…	None	2	0	0	95	2	14	73.3	40.3	None	12.8	2.5	3.75	64.5	27.2	5.6	2.4	0.3	0	2.42	1.02	0.21	0.09	0.01	0	4.72	130	38.6	81.8	337	27.5	39.6	13.2	103	12.2	16.3
Y160	71	0	female	Endoscopic hepatobiliary surgery	2019-12-2900:00:00	0	0	0	0	0	1. Hepatic space occupying lesions	The shape and size of the liver section are normal, the echo in the liver is uneven, a slightly hypoechoic mass can be seen in the left lobe of the liver, the size is about 78 × 45mm, the shape is oval, the internal echo is uneven, the boundary is slightly fuzzy, the rear echo is unchanged, and the blood vessels in the liver are not displaced. CDFI: short strip blood flow signal can be seen aroun…	None	None	1	1	0	78	2	18	68.9	38.9	None	8.6	1.7	4.05	55.6	30.4	8.1	5.2	0.7	0	2.25	1.23	0.33	0.21	0.03	0	3.95	120	35.3	89.4	340	30.4	41	12.5	209	10.2	11.6
Y164	43	0	female	Hepatobiliary pancreatic surgery	2020-01-0310:52:00	0	0	0	0	1	1. liver space occupying: primary liver cancer? Gallbladder cancer liver metastasis? Portal vein tumor thrombus? 2. obstructive jaundice 3. gallstone 4. chronic hepatitis B	The shape and size of the liver section are normal, the echo in the liver is uneven, a substantial mass can be seen in the left inner lobe and the right anterior lobe of the liver, the size is about 95 × 76mm, the shape is irregular, the interior is hyperechoic, the distribution is uneven, the edge is clear, the rear echo is unchanged, there is a sound halo around, and the blood vessels in the li…	The gallbladder wall was significantly thickened and presented as an irregular soft tissue density mass, with a size of about 23 × 61mm. A few nodular high-density shadows were seen in the gallbladder wall. The gallbladder wall was significantly non uniformly enhanced on enhanced scan. The three-phase enhanced CT values were about 82-120hu, 94-105hu, 83-93hu. The gallbladder wall was incomplete a…	None	1	1	0	95	2	38	61.6	31.2	None	22.3	8.8	1.3	2.29	66	27.5	4.8	1.3	0.01	0.4	1.51	0.63	0.11	0.03	0	3.3	87	28	84.8	311	26.4	47.8	15.6	100	9.7	9.7
Y165	63	1	male	Hepatobiliary pancreatic surgery	2020-01-0709:55:07	0	0	1	0	0	1. liver cyst 2. chronic superficial gastritis 3. left kidney cyst 4. left kidney stone 5. mild coronary stenosis	The morphology of the liver section is normal, the echo distribution in the liver is uneven, and multiple anechoic areas can be seen in the liver, the larger one is located in the right lobe, the size is about 76 × 59mm, the shape is quasi circular, the interior is an anechoic area, the boundary is clear, the wall is thin, and the rear echo is enhanced. The intrahepatic duct structure was clearly…	The size and morphology of the liver were normal. Multiple quasi circular low-density shadows were seen in the liver parenchyma, about 69mm in diameter, about 5HU in CT value, and the boundary was still clear; The density of the remaining liver parenchyma is still uniform, and no obvious abnormal density shadow is found. The shape and size of gallbladder are not different, the wall is not signifi…	None	4	0	1	76	2	16	66.8	40.2	None	11.5	2.3	5.48	41.4	49.3	6.6	2.2	0.5	0	2.27	2.7	0.36	0.12	0.03	0	4.77	144	43.9	92	328	30.2	43.7	12.9	207	9.8	10.9
Y167	72	0	female	Minimally invasive interventional Department	2020-01-1200:00:00	0	1	0	0	1	1. Hepatic space occupying lesions	None	The liver volume is slightly reduced, the liver fissure is slightly widened, and the edge is wavy. A class of circular low-density shadow can be seen in the liver S7, the boundary is not clear, the size is about 29 × 32 × 33mm, and the CT value is about 45hu. After enhancement, the early lesions of the artery show patchy enhancement, and the CT value is about 91hu. The density of lesions in the v…	None	4	0	0	33	2	12	79.4	44.6	None	11.2	2.3	5.47	59.1	29.1	10.1	1.3	0.4	0	3.24	1.59	0.55	0.07	0.02	0	4.73	145	43.8	89.8	329	29.5	42.6	13	194	12	15.5
Y168	52	1	male	Hepatobiliary pancreatic surgery	2020-02-1009:39:11	0	0	0	0	1	Hepatic space occupying lesions	The shape and size of the liver section are normal, and the echo in the liver is uneven. A slightly hyperechoic mass can be seen under the capsule at the junction of S6 and 7 of the right lobe of the liver, about 18 × 16mm in size, oval in shape, uneven internal echo, cribriform change, clear boundary, regular edge, no change in the rear echo, and no displacement of the blood vessels in the liver…	None	None	2	0	1	18	1	19	64	39.9	None	10.1	1.7	7.1	64.8	23.2	7.7	3.2	1.1	0	4.59	1.65	0.55	0.23	0.08	0	5.24	153	47.2	90.1	324	29.2	41.3	12.5	179	11.4	13.9
Y170	40	0	male	Hepatobiliary pancreatic surgery	2020-02-2819:14:00	0	0	0	0	0	Hepatic space occupying lesions	None	None	An irregular slightly long T1 slightly long T2 signal mass shadow can be seen in the right lobe of the liver, with a clear edge, and the size is about 38 × 48 × 63mm (section × height diameter). The internal signal is not uniform, patchy slightly short T1 signal can be seen, and the inverse phase is not significantly reduced. The corresponding T2WI is slightly low signal. The lower part of the le…	1	1	0	48	2	39	67.6	38.7	None	17.4	2.6	9.81	66.7	19.9	12.1	0.9	0.4	0	6.54	1.95	1.19	0.09	0.04	0	4.6	144	42	91.3	343	31.3	40.4	12.2	307	8.9	9.2
Y173	36	0	male	Minimally invasive interventional Department	2020-03-0409:42:05	0	0	0	0	0	Hepatic hemangioma	The shape of the liver section is normal, the volume is not large, the echo distribution in the liver is uneven, the first half is slightly thickened and enhanced, the second half is slightly sparse and attenuated, two adjacent slightly hyperechoic masses can be seen in the right lobe of the liver, the size is about 56 × 45mm, 31 × 25mm, the shape is quasi circular, the internal echo is uneven, t…	None	None	2	0	1	56	2	25	72	44.2	None	13.3	2	7.57	57.2	34.9	5.7	1.7	0.5	0	4.33	2.64	0.43	0.13	0.04	0	5.24	157	47.8	91.2	328	30	41.9	12.7	258	10.3	12.5
Y174	64	1	male	Hepatobiliary pancreatic surgery	2020-03-0414:46:00	1	1	0	0	0	Hepatic space occupying lesions	None	None	The liver surface is smooth, the proportion of each lobe is uniform, the liver S4 class circular long T1 long T2 signal shadow, the length diameter is about 16mm, the DWI shows high signal, the ADC shows low signal, the enhancement scan is obviously enhanced in the arterial phase, the enhancement decrease can be seen in the delayed phase, and the contrast agent uptake is not seen in the specific …	1	1	0	16	1	37	68.4	38	None	10.8	1.9	3.79	46.3	42	7.7	3.2	0.8	0	1.76	1.59	0.29	0.12	0.03	0	3.94	134	38.2	97	351	34	41.3	11.7	107	12.8	19
Y177	29	0	male	Minimally invasive interventional Department	2020-03-2610:47:45	0	0	0	0	0	Hepatic hemangioma	None	None	The surface of liver is smooth and the proportion of each lobe is uniform; A large abnormal signal shadow can be seen in the right lobe of the liver, which is lobulated in shape, with clear boundary, slightly hypointense on T1WI, fissure like hypointense shadow can be seen in the center, significantly hyperintense on T2WI, multiple striped hypointense shadows can be seen inside, hyperintense on D…	2	0	1	69	2	55	65.9	41.1	None	22	4.1	6.44	47.1	38.5	12.1	1.7	0.6	0	3.03	2.48	0.78	0.11	0.04	0	4.81	147	44.2	91.9	333	30.6	41.6	12.2	192	11.6	16
Y178	57	1	male	Hepatobiliary pancreatic surgery	2020-03-3113:07:16	1	0	0	0	0	Hepatic space occupying lesions	None	None	None	4	0	1	62.0	2	242	56.6	34.7	None	377.3	243.4	9.35	74	17.1	6.5	1.9	0.5	0.1	6.91	1.6	0.61	0.18	0.05	0.01	4.07	122	38.4	94.3	318	30	53.1	15.3	388	10.9	13.4
Y180	24	0	female	Hepatobiliary pancreatic surgery	2020-04-1409:47:51	0	0	0	0	0	Hepatic space occupying lesions	The shape and size of the liver section are normal, the echo of the envelope is regular, and the echo of the liver parenchyma is punctate medium echo, with uneven distribution. A slightly hyperechoic mass with a size of about 50 × 48mm can be seen in S7 of liver, which is regular in shape, and the internal echo is uneven. An anechoic area can be seen with clear periphery. CDFI: strip blood flow s…	None	None	1	1	1	50	2	18	63.3	40.9	None	16.3	3.4	5.15	48.6	41.4	7.8	1.6	0.6	0	2.51	2.13	0.4	0.08	0.03	0	4.12	126	37.5	91	336	30.6	39.8	11.9	241	10.9	13.1
Y182	35	0	male	Hepatobiliary pancreatic surgery	2020-04-2209:47:21	0	0	0	0	0	1. multiple space occupying lesions in the liver: hepatic hemangioma? 2. right renal cyst	None	The size and morphology of the liver were normal, and multiple quasi circular slightly low-density shadows were seen in the liver, the largest of which was located in the left outer lobe of the liver, about 67 × 99 × 92mm. The periphery of the lesions in arterial phase and portal phase showed nodular and patchy enhancement, and the enhancement in delayed phase spread to the center and increased i…	None	4	0	1	99	2	20	64	41.5	None	17.1	3.2	5.7	38.2	51.8	8.9	0.7	0.4	0	2.18	2.95	0.51	0.04	0.02	0	4.95	144	44.6	90.1	323	29.1	41.8	12.8	161	13	16.9
Y183	47	0	female	Hepatobiliary pancreatic surgery	2020-04-2309:23:51	0	0	0	0	0	1. multiple liver cysts 2. thyroid nodules 3. after caesarean section	The morphology of the liver section is normal, and the echo distribution in the liver is uneven. Multiple anechoic areas can be seen in the liver, varying in size, about 80 × 58mm (right posterior lobe), with irregular shape. The interior is an anechoic area, with clear boundary, thin wall, and enhanced echo in the rear. The intrahepatic duct structure was clearly displayed	None	None	4	0	1	80	2	8	60.1	30.2	None	12.5	2.4	2.78	52.5	37.1	7.9	1.4	1.1	0	1.46	1.03	0.22	0.04	0.03	0	3.28	79	25.4	77.4	311	24.1	50.4	18	275	9.7	10.8
Y184	65	1	male	Hepatobiliary pancreatic surgery	2020-04-2610:19:39	0	0	0	0	0	Hepatic space occupying lesions	None	None	None	4	0	1	15	1	28	64.1	39.5	None	11.2	2.6	6.48	56	30.7	5.7	6.8	0.8	0	3.63	1.99	0.37	0.44	0.05	0	5.11	116	36	70.5	322	22.7	38.4	15.6	209	11	13.1
Y186	38	0	male	Hepatobiliary pancreatic surgery	2020-05-0709:12:35	1	0	0	0	0	Hepatic space occupying lesions	The shape and size of the liver section are normal, the echo in the liver is uneven, the first half is thickened and enhanced, and the second half is sparse and attenuated. Multiple heterogeneous echo masses can be seen in the liver, which are about 45 × 41mm (right posterior lobe) and 45 × 35mm (left inner lobe), and are oval in shape. The internal echo is uneven, the boundary is not clear, the …	Bilateral thorax was symmetrical. No obvious abnormal density shadow is found in both lungs. The structures of both hilar lobes are still unclear. Mediastinum is in the middle, and there is no obvious enlarged lymph node shadow in it. The trachea and bronchus are unobstructed and continuous without obvious stenosis or obstruction. The size and shape of the heart shadow were normal. No obvious eff…	The morphology of liver is regular, and the proportion of each lobe is uniform; The signal of liver parenchyma is uneven. Multiple nodular abnormal signal foci of different sizes can be seen. The diameter is about 12-43mm, and the larger is about 43 × 35 × 34mm. They are located in the left lobe of the liver, showing low T1WI, high t2spair, high DWI signal. The boundary is clear, and the internal…	4	0	0	45	2	30	74.3	32.3	None	13.9	3.2	17.24	75.1	18.7	5.6	0.3	0.3	0	12.95	3.22	0.96	0.06	0.05	0	4.71	150	42.5	90.2	353	31.8	38.1	11.6	383	10.1	11.3
Y189	63	0	female	Hepatobiliary pancreatic surgery	2020-05-1809:42:23	0	0	0	0	0	Hepatic space occupying lesions	The morphology of the liver section is basically normal, the surface of the liver envelope is smooth, and the echo distribution in the liver is uneven. A substantial mass with a size of about 57 × 50mm can be seen at the second porta hepatis in the right lobe of the liver. The shape is irregular, and the interior is hypoechoic, the distribution is uneven, the edge is not clear, and the blood vess…	None	None	1	1	0	57	2	10	72.6	44.8	None	11	3	5.38	72.3	17.1	8.7	1.5	0.4	0	3.89	0.92	0.47	0.08	0.02	0	4.23	129	39.7	93.9	325	30.5	42.4	12.3	169	11.4	14
Y190	51	1	male	Hepatobiliary pancreatic surgery	2020-05-2110:38:51	1	1	0	1	1	Hepatic space occupying lesions	The shape of the liver section is normal, the volume is not significantly reduced, the surface of the liver envelope is not smooth, the front end of the liver margin is slightly blunt, the echo in the liver is thickened and enhanced, and the distribution is uneven. Several slightly hyperechoic nodules can be seen in the liver. The larger two are about 19 × 17mm in size (S7 segment of the right lo…	None	None	4	0	0	19	1	31	57	29.7	None	8.1	2.2	4.04	47.5	36.6	9.2	6.2	0.5	0	1.92	1.48	0.37	0.25	0.02	0	3.95	127	38.2	96.7	332	32.2	48.8	13.6	53	13.7	20.2
Y191	73	0	female	Hepatobiliary pancreatic surgery	2020-05-2610:18:28	0	0	0	0	0	1. giant cyst of left liver 2. fatty liver 3. after operation of left breast cancer	None	A huge round cystic low-density shadow can be seen in the left lobe of the liver, with clear edges, the size is about 103 × 75 × 78mm (section × height diameter), and the CT value is about 9hu, which is similar to the previous one; Two small round low-density shadows with a diameter of about 5mm were also seen in the right lobe of the liver, which was similar to that before; No abnormal density s…	None	3	0	1	103	2	20	66	37.5	None	10.3	1.9	4.73	61.1	25.4	9.1	3.6	0.8	0	2.89	1.2	0.43	0.17	0.04	0	3.86	120	35.5	92	338	31.1	43.1	12.8	150	12.2	15.7
Y193	67	1	male	Hepatobiliary pancreatic surgery	2020-05-3110:09:03	0	0	0	0	1	Hepatic space occupying lesions	The morphology of the liver section was abnormal, the right lobe was narrowed, the left lobe was enlarged, the surface of the liver envelope was wavy, the front end of the liver margin was blunt, the echo in the liver was thickened and enhanced, and the distribution was uneven. A hypoechoic mass with a size of about 35 × 27mm (M1) could be seen at the junction of the s4/5 segment of the liver, wh…	None	The liver volume was reduced, the surface was wavy, the proportion of liver lobes was imbalanced, the left lobe was slightly increased, the right lobe was relatively reduced, and the grid shape was changed on T2WI. A round like abnormal signal mass with a size of about 34 × 28mm can be seen at the junction of s4/5 of the liver. It is hypointense on T1WI, without signal reduction in the reverse ph…	1	1	1	35	2	29	58.4	32.4	None	20.9	5.3	5.04	37.3	47.2	9.9	4.6	1	0	1.88	2.38	0.5	0.23	0.05	0	4.53	141	41	90.5	344	31.1	41.6	12.5	147	11	13.7
Y194	62	1	male	Minimally invasive interventional Department	2020-06-0411:08:47	0	0	0	0	1	Hepatic space occupying lesions	The shape and size of the liver section are normal, the echo of the envelope is regular, and the echo of the liver parenchyma is thickened and enhanced. A slightly hyperechoic area of about 21 × 18mm can be seen in the S8 segment of the liver, with fuzzy boundary and irregular shape. A strong echo with size of about 10 × 4mm can be seen in the right lobe of the liver, followed by acoustic shadow.…	The surface of the liver is still smooth, and a quasi circular slightly low-density shadow can be seen in s6/7 of the liver, with a size of about 12*14mm and a CT value of about 45hu. The lesions are isodense in the arterial phase of enhanced scanning, and lower in the portal phase and delayed phase than in the liver parenchyma. Several small nodules with a diameter of about 2-7mm can be seen in …	The liver surface is still smooth, a kind of circular slightly long T1 slightly long T2 signal shadow with a size of about 15 × 16 × 14mm can be seen in the liver s6/7, the DWI shows high signal, the corresponding ADC image shows low signal, mild uneven enhancement can be seen in the early arterial phase on enhanced scan, the lesions in the late arterial phase and early portal vein phase show obv…	2	0	0	21	1	17	61	35.7	None	13.8	2.7	3.67	54.8	31.9	9.3	3.5	0.5	0	2.01	1.17	0.34	0.13	0.02	0	4.5	142	40.8	90.7	348	31.6	41.8	12.7	115	10.7	12.2
Y195	62	0	female	Hepatobiliary pancreatic surgery	2020-06-0711:40:30	0	0	0	0	0	Hepatic space occupying lesions	The shape and size of the liver section are normal, the echo of the envelope is regular, the echo of the liver parenchyma is punctate medium echo, evenly distributed, and no obvious stone echo is found in the liver. A solid mixed echo mass with a range of about 93x79mm can be seen in S4 and S5 segments, the boundary is still clear, no obvious halo is seen, multiple strong echo spots and small pat…	Irregular lobulated low-density soft tissue mass shadow can be seen in the left inner lobe and the right anterior lobe of the liver, with a larger cross-sectional range of about 82.5 × 60.0 × 107.5mm. The plain scan edge is not smooth and fuzzy, and the density is not uniform. The CT value is about 29-39hu. The "capsular depression sign" can be seen locally. The lesion protrudes downward to the o…	None	1	1	1	93	2	17	69	43.2	None	10.7	1.8	5.41	68.9	23.8	6.5	0.4	0.4	0	3.73	1.29	0.35	0.02	0.02	0	4.3	129	39.8	92.6	324	30	44.5	13.2	117	14.6	22.2
Y197	52	0	female	Hepatobiliary pancreatic surgery	2020-06-1611:39:45	0	0	0	0	0	Hepatic space occupying lesions	None	The size and morphology of each lobe of the liver are normal, the edges are smooth, multiple quasi circular low-density shadows are seen in the liver, the size of the larger right lobe is about 120mm × 93mm × 108mm (maximum cross section × upper and lower diameter), the internal density is not uniform, the CT value is about 39-43hu, multiple patchy lower density shadows are seen in the liver, nod…	None	4	0	1	120	2	16	70.2	42.6	None	16.7	2.9	4.82	52.4	40.5	4.8	1.5	0.8	0	2.53	1.95	0.23	0.07	0.04	0	4.05	118	35.9	88.6	329	29.1	40.1	12.4	205	11.9	15.5
Y199	55	1	male	Endoscopic hepatobiliary surgery	2020-06-2110:47:00	0	0	0	0	0	1. Hepatic space occupying lesions	The shape of the liver section is normal, the volume is not large, the echo distribution in the liver is uneven, the first half is slightly thickened and enhanced, the second half is slightly sparse and attenuated, there is no obvious tumor image in it, the intrahepatic pipeline structure is not clear, and the extrahepatic surface still exists. The volume of the gallbladder section is not large, …	None	The surface of liver is smooth and the proportion of each lobe is uniform; A class of circular abnormal signal foci can be seen in S2 and S4 of liver respectively. The larger S4 is about 10*15mm in size. T1WI shows isolow signal, t2spair shows isohigh signal, DWI shows slightly high signal, and the boundary is not clear; After dynamic enhancement, the arterial phase showed obvious enhancement, th…	4	0	0	15	1	10	64.1	39.8	None	10.3	1.4	5.02	56.5	35.3	6.8	1.2	0.2	0	2.84	1.77	0.34	0.06	0.01	0	4.83	143	41.4	85.7	345	29.6	39.2	12.6	206	10.4	12.4
Y201	68	1	male	Minimally invasive interventional Department	2020-07-0110:09:40	0	0	0	0	0	1. Liver cysts; 2. Mild fatty liver	Multiple anechoic areas with different sizes can be seen in the liver. The larger one, about 86 × 76mm, is located in S8 of the liver. The shape is quasi circular. The interior is an anechoic area with clear boundaries, thin walls, and enhanced posterior echo.	None	None	4	0	1	86	2	36	71.5	41.7	None	11.3	1.9	6.43	58.9	29.5	7.6	3.4	0.6	0	3.78	1.9	0.49	0.22	0.04	0	4.81	150	44.5	92.5	337	31.2	41.5	12.1	175	10.9	12.6
Y203	61	0	female	Hepatobiliary pancreatic surgery	2020-07-0709:52:11	0	0	0	0	0	Hepatic space occupying lesions	The shape and size of the liver section are normal, and the echo in the liver is uneven. Multiple abnormal echo masses can be seen in the liver, which are about 27 × 23mm (located in the right posterior lobe of the liver, showing high echo) and 20 × 18mm (located in the right anterior lobe of the liver, showing low echo). The shape is quasi circular, the internal echo is uneven, the boundary is c…	The size and morphology of each lobe of the liver are normal, and the edge is smooth. A class of circular slightly low-density shadow can be seen in the s5/6, 7/8 junction area and S8 junction area of the liver, and the boundary is not clear. The size of the larger S5, 6 junction area is about 17*22mm, and its internal density is not uniform, and the CT value is about 40hu. Spot like and nodular …	The size and morphology of each lobe of the liver were normal, and the edge was smooth. A kind of circular long T1 long T2 signal shadow was seen in the s5/6 and 7/8 junction areas of the liver, and the boundary was not clear. The size of the larger S5 and 6 junction areas was about 18 × 22mm. DWI and ADC showed high signal, and there were punctate and nodular enhancement at the edge of the lesio…	4	0	0	27	1	14	70.7	40.3	None	17.1	2.4	7.12	68	20.1	8.4	2.9	0.6	0	4.84	1.43	0.6	0.21	0.04	0	4.51	133	40.1	88.9	332	29.5	43.3	13.2	200	11.7	14
Y206	77	0	female	Hepatobiliary pancreatic surgery	2020-07-1410:41:02	0	0	0	1	0	Hepatic space occupying lesions	A substantial mass can be seen in S7 of the right lobe of the liver, about 23 × 18mm in size, slightly irregular in shape, hypoechoic inside, clear boundary, and uneven internal echo. Cdfi: there is no obvious blood flow signal in and around the mass. Enhanced ultrasound: 1.5ml of contrast agent SonoVue (59mgsonovue+5ml normal saline) was injected through the dorsal vein of the hand, and the time…	None	None	1	1	1	23	1	57	69.5	44.8	None	14.8	3.5	4.85	67.2	17.1	8.9	6.2	0.6	0	3.26	0.83	0.43	0.3	0.03	0	4.34	133	40.7	93.8	327	30.6	43.1	12.5	151	11.5	14.6
Y209	39	0	female	Minimally invasive interventional Department	2020-07-2409:54:11	0	0	0	0	0	Hepatic hemangioma	The shape and size of the liver section are normal, and the echo in the liver is uneven. Two slightly hypoechoic masses can be seen in the liver, about 57 × 28mm (right anterior lobe) and 45 × 36mm (right lobe), respectively. The shape is irregular, the internal echo is uneven, the boundary is not clear, the edge is regular, the rear echo is unchanged, and the blood vessels in the liver are not d…	None	None	2	0	0	57	2	14	65.3	38.6	None	9.7	1.5	6.88	51.3	39.8	6.4	2.2	0.3	0	3.53	2.74	0.44	0.15	0.02	0	3.85	122	36.2	94	337	31.7	44.1	12.8	303	9.9	11
Y210	32	0	male	Minimally invasive interventional Department	2020-08-0209:50:05	0	0	0	0	1	1. hepatic hemangioma; 2. follow up of chronic viral hepatitis B	The shape and size of the liver section are normal, the echo in the liver is uneven, a slightly hyperechoic mass can be seen in the right lobe of the liver, the size is about 32 × 19mm, the shape is oval, the internal echo is uneven, the boundary is clear, the edge is regular, the rear echo is unchanged, and the blood vessels in the liver are not displaced	None	The liver surface was smooth, and the proportion of each lobe was uniform. Multiple round like abnormal signal shadows were seen at the junction of S4, S6 / 7 and S7 of the liver, showing low T1WI, high t2spair, uniform internal signal and clear boundary; There are 3 pieces in total, the larger one is located at S6 / 7 junction, with a diameter of about 26.8mm; Contrast enhanced scan showed that …	3	0	1	32	2	22	65.1	41.3	None	16.3	3	5.83	40.9	43.1	9.4	5.7	0.9	0	2.39	2.51	0.55	0.33	0.05	0	4.6	141	40.8	88.7	346	30.7	36.5	11.3	231	9.5	10.3
Y213	45	1	male	Minimally invasive interventional Department	2020-08-0510:02:14	0	0	0	0	1	Hepatic space occupying lesions	None	The liver surface is smooth, the proportion of liver lobes is coordinated, the liver fissure is not wide, two patchy low-density shadows can be seen in the right lobe of the liver, the boundary is unclear, and the sizes are about 34 × 26mm (next to the gallbladder fossa) and 33 × 48mm (s5/6), respectively. The plain CT value is about 53hu, and the enhanced CT value is delayed enhancement, and the…	None	2	0	0	48	2	27	76.5	42.4	None	16	2.4	6.85	48.6	45.7	4.4	0.9	0.4	0	3.33	3.13	0.3	0.06	0.03	0	6.28	153	46.2	73.6	331	24.4	38.2	14.6	229	10.3	13.4
Y215	64	0	female	Minimally invasive interventional Department	2020-08-1409:25:14	0	0	0	0	0	1. hepatic hemangioma; 2. multiple hepatic cysts; 3. renal cyst	None	Multiple quasi circular low-density shadows can be seen in the liver, with CT value of about 6hu and diameter of about 3-21mm. The boundary is clear and similar to that before. A 47mm × 30mm (about 49mm × 32mm measured on the same plane of the anterior slice) slightly low-density space occupying lesion can be seen in S1 of the liver, with slightly blurred boundary and uneven density, similar to t…	None	4	0	1	49	2	11	70	43.1	None	19.6	2.8	3.88	51.3	36.9	9.5	1.8	0.5	0	1.99	1.43	0.37	0.07	0.02	0	4.6	141	42	91.3	336	30.7	39.1	11.6	199	10.9	13.2
Y216	40	0	female	Hepatobiliary pancreatic surgery	2020-08-1810:10:34	0	0	0	0	0	1. Huge hemangioma of the liver 2. Multiple small cysts of the liver 3. Gallstone with cholecystitis	The shape and size of the liver section are normal, the echo in the liver is uneven, a slightly hyperechoic mass can be seen in the right lobe of the liver, the size is about 109 × 97mm, the shape is quasi circular, the internal echo is uneven, the boundary is clear, the edge is regular, the rear echo is unchanged, and the blood vessels in the liver are pushed. A strongly echogenic spot with a si…	The size and morphology of each lobe of the liver are normal, the edges are smooth, a class of oval slightly low-density foci can be seen in the liver across S4, 8, and 5, the boundary is still clear, the internal density is not uniform, the CT value is about 45hu, the size is about 105 × 85 × 83mm (cross section × upper and lower diameter), the lesions in the enhanced arterial phase can see obvi…	None	4	0	1	105	2	8	71.6	40.5	None	15.9	3.5	5.77	49.8	34.8	6.9	7.6	0.9	0	2.87	2.01	0.4	0.44	0.05	0	4.09	125	38.9	95.1	321	30.6	43.9	12.8	244	10.1	11.4
Y218	57	0	female	Hepatobiliary pancreatic surgery	2020-08-2510:32:49	0	0	0	0	0	Hepatic space occupying lesions	None	The size and morphology of each lobe are normal, and the edge is smooth. A class of oval slightly low-density foci can be seen in S4, with a lower density in the center. The density is not uniform within it, the boundary is unclear, and the size is about 62 × 47mm. Thick, tortuous arteries can be seen in the periphery, extending to the interior of the mass; In the arterial phase of enhancement, t…	None	2	0	0	62	2	11	69.1	38.8	None	8.3	1.4	6.48	61.9	26.5	8	2.8	0.8	0	4.01	1.72	0.52	0.18	0.05	0	4.03	119	37.9	94	314	29.5	42.2	12.1	299	11.1	13.7
Y220	62	1	male	Hepatobiliary pancreatic surgery	2020-09-0410:01:50	0	1	0	0	0	Hepatic space occupying lesions	The shape and size of the liver section are normal, the echo of the envelope is regular, the echo of the liver parenchyma is punctate medium echo, and the distribution is even. The common bile duct is about 10mm wide, and a medium echo mass can be seen in it, with a range of about 56 × 27mm. The bile duct wall is not clearly displayed. CDFI: no obvious blood flow signal is seen in the mass. The i…	Irregular slightly long T1 and slightly long T2 signal shadow with a size of about 34mm × 35mm × 37mm can be seen in the hepatic hilum. DWI shows diffusion limited high-signal shadow, and the corresponding ADC value is slightly reduced. It is distributed along the bile duct, and the adjacent bile duct is truncated. The intrahepatic bile duct is dilated, with obvious left branches in a soft rattan…	None	1	1	0	56	2	165	60	35.4	None	176.9	110.3	3.75	62.7	21.3	12.5	3.2	0.3	0	2.35	0.8	0.47	0.12	0.01	0	3.32	107	31.4	94.6	341	32.2	51.8	14.9	122	13.2	18.6
Y221	32	0	male	Hepatobiliary pancreatic surgery	2020-09-0410:21:37	0	0	0	0	1	Hepatic space occupying lesions	None	A kind of circular slightly low-density shadow can be seen in the right posterior lobe of the liver, the boundary is not clear, about 95mm × 68mm × 96mm in size (maximum cross section × upper and lower diameter), the internal density is not uniform, and the CT value is about 23-50hu. Circular and nodular enhancement can be seen at the edge of the lesion in the enhanced arterial phase, and the enh…	None	1	1	0	95	2	64	62.9	40.5	None	12.9	2.4	5.3	60	32.6	5.7	1.1	0.6	0	3.18	1.73	0.3	0.06	0.03	0	5.36	155	47.2	88.1	328	28.9	38.9	12.2	158	12.1	16
Y223	47	0	female	Minimally invasive interventional Department	2020-09-1000:00:00	0	0	0	0	0	Hepatic space occupying lesions	None	The liver edge is smooth, the proportion of liver lobes is coordinated, the liver fissure is not wide, a kind of circular low-density shadow can be seen in the liver S5, the boundary is clear, the density is not uniform, the CT value is about -55hu to 22hu, the solid part of the enhanced scan in the arterial phase is significantly enhanced, the CT value is about 105hu, the enhancement degree in t…	None	1	1	1	12	1	9	72.5	43.2	None	7.8	1.4	7.48	62.3	29.9	6.6	0.5	0.7	0	4.66	2.24	0.49	0.04	0.05	0	4.64	122	38.4	82.8	318	26.3	41.5	13.7	308	11	12.9
Y224	53	1	male	Hepatobiliary pancreatic surgery	2020-09-1310:27:02	1	0	0	0	0	Hepatic space occupying lesions	None	The shape and size of the liver are normal, the surface is smooth, the proportion of liver lobes is normal, the liver fissure is not widened, the liver S6 shows a round like slightly low-density shadow, with a diameter of about 17mm. After enhancement, the edge of the arterial phase is significantly enhanced, and the portal phase and delayed phase are filled to the center and not filled; There we…	None	4	0	0	33	2	20	61.2	39.7	None	8.2	1.7	4.95	58.8	31.3	7.3	2	0.6	0.2	2.91	1.55	0.36	0.1	0.03	0.01	5.58	112	36.9	66.1	304	20.1	35.5	15.6	171	10.7	12.4
Y226	84	0	female	Hepatobiliary pancreatic surgery	2020-09-1600:00:00	0	0	0	0	0	Hepatic space occupying lesions	The liver surface is uneven, the liver fissure is not wide, a kind of circular low-density shadow can be seen in the S4 and 8 segments of the liver, the size is about 60 × 58mm (cross-sectional area), the boundary is still clear, the internal density is uneven, and the lower density shadow can be seen in the center. The enhanced scan shows obvious uneven enhancement in the arterial phase, low enh…	None	None	2	0	1	60	2	103	67.9	36.6	None	11.1	3.2	4.65	56.4	30.5	8.6	4.1	0.4	0	2.62	1.42	0.4	0.19	0.02	0	3.97	123	37.1	93.5	332	31	44.4	13.1	134	9.8	10.7
Y228	34	0	male	Endoscopic hepatobiliary surgery	2020-09-2200:00:00	0	0	0	0	0	1. Hepatic space occupying lesions	The shape and size of the liver section are normal, the echo of the envelope is regular, the echo of the liver parenchyma is still uniform, and the pipeline structure is clearly displayed. Multiple strong echo spots can be seen in the right anterior lobe of the liver, which are distributed along the direction of the hepatic bile duct, the larger one is about 15 × 7mm, the rear is accompanied by w…	None	None	4	0	0	17	1	23	65.7	40.3	None	7.4	1.6	5.56	47.9	41.4	8.6	1.6	0.5	0	2.66	2.3	0.48	0.09	0.03	0	4.62	135	41	88.7	329	29.2	38.2	11.9	322	9.7	10.8
Y229	47	0	female	Hepatobiliary pancreatic surgery	2020-09-2309:38:30	0	0	0	0	0	Hepatic space occupying lesions	None	The shape and size of the liver are normal, the surface is smooth, the proportion of liver lobes is normal, and the liver fissure is not widened. A slightly low-density shadow with a size of about 49mm × 41mm can be seen in the liver S3, which shows obvious enhancement in each phase after enhancement, and a sheet-like low-density shadow in the center shows progressive enhancement. Multiple slight…	None	4	0	1	49	2	12	65	38.9	None	6.5	1	5.25	55.6	35.6	5.7	2.7	0.4	0	2.92	1.87	0.3	0.14	0.02	0	4.23	126	38.2	90.3	330	29.8	40.7	12.5	247	10.5	12
Y230	84	0	female	Hepatobiliary pancreatic surgery	2020-09-2409:25:56	0	0	0	0	0	Hepatic space occupying lesions	The morphology of the liver section is basically normal, the surface of the liver capsule is not smooth, and the echo distribution in the liver is uneven. Several hyperechoic masses can be seen in the liver, which are about 113 × 106mm in diameter. The shape is irregular, the distribution is uneven, the edge is not clear, the echo in the rear is weakened, there is a sound halo around, satellite n…	None	None	4	0	0	128	2	23	71.4	34.7	None	20.2	6.6	8.61	81.6	7.3	7.1	3.7	0.3	0	7.02	0.63	0.61	0.32	0.03	0	3.34	99	30.4	91	326	29.6	54.3	16.4	307	11.9	14.3
Y231	54	0	female	Minimally invasive interventional Department	2020-09-2709:43:32	0	0	0	0	0	1. liver cyst; 2. hypertension; 3. depression	None	The liver edge is smooth, the proportion of liver lobes is coordinated, the liver fissure is not wide, the size and morphology of the liver are normal, the edge is smooth, a kind of oval low-density shadow can be seen in the left lobe, the size is about 84mm × 109mm × 133mm, the CT value is about 8hu, the boundary is clear, the density is uniform, and a small circular low-density shadow can be se…	None	2	0	1	133	2	13	68.9	40.8	None	9.4	1.7	6.12	69.3	23.4	6	0.8	0.5	0	4.24	1.43	0.37	0.05	0.03	0	3.93	116	35.5	90.3	327	29.5	41.1	12.4	235	11.7	15
Y232	56	0	female	Minimally invasive interventional Department	2020-09-2809:37:40	0	0	0	0	0	Hepatic cyst	The shape of the liver section is normal, and the echo distribution in the liver is uneven. An anechoic area can be seen in the liver, about 131 × 108mm in size, quasi circular in shape, and an anechoic area inside, with clear boundary, thin wall, and enhanced echo in the rear. The intrahepatic duct structure was clearly displayed	None	None	1	1	1	131	2	15	65.1	39.7	None	9.2	1.5	3.8	42.2	38.9	9.7	8.4	0.8	0	1.6	1.48	0.37	0.32	0.03	0	4.09	129	37.4	91.4	345	31.5	41.1	12.4	245	9.1	9.2
Y234	62	0	female	Hepatobiliary pancreatic surgery	2020-10-0809:35:29	0	0	0	0	0	1. liver cyst 2. mild fatty liver 3. hypertension	The shape of the liver section is normal, the volume is not large, the echo distribution in the liver is uneven, the first half is slightly thickened and enhanced, and the second half is slightly sparse and attenuated. Multiple anechoic areas can be seen in the liver, varying in size, the larger one is about 145 × 131mm, the shape is quasi circular, the interior is an anechoic area, the boundary …	The size and morphology of the liver are normal, the edges are smooth, and multiple circular low-density shadows of different sizes can be seen in the liver, the larger ones are about 145 × 120mm in size, the CT value is about 6hu, and the boundary is clear	None	4	0	1	145	2	25	70.6	42.1	None	13.1	2.2	6.29	53.5	37.4	6.8	1.7	0.6	0	3.36	2.35	0.43	0.11	0.04	0	4.6	135	42	91.3	321	29.3	41.3	12.6	200	9.1	9.9
Y236	26	0	male	Hepatobiliary pancreatic surgery	2020-10-1009:29:17	0	0	1	0	0	Hepatic space occupying lesions	None	None	The liver edge is smooth, the proportion of liver lobes is coordinated, the liver fissure is not wide, a slightly low-density mass shadow can be seen in the S2 segment of the left lobe of the liver, the size is about 50mm × 44mm, the lesion is obviously abnormal enhancement in the early dynamic enhancement, the density is uniform in the portal venous phase, the central density of the lesion is sl…	1	1	0	50	2	38	67.3	43.3	None	12.6	2.5	6.11	65.3	23.6	7.5	3.3	0.3	0	3.99	1.44	0.46	0.2	0.02	0	4.86	144	44.1	90.7	327	29.6	46	13.7	195	10	10.8
Y240	55	0	female	Minimally invasive interventional Department	2020-10-1309:55:28	0	0	0	0	0	Hepatic hemangioma	None	The size and morphology of each lobe of the liver are normal, the edges are smooth, and the boundaries are not clear. Several quasi circular low-density shadows can be seen in S1, 2, 5, 6, 7, and 8 of the liver, and some boundaries are fuzzy. Nodular enhancement can be seen at the edge of the lesion in the enhanced arterial phase, and the enhanced shadows in the portal venous phase and delayed ph…	None	4	0	0	125	2	18	68.2	42.6	None	9.4	1.6	3.42	57.1	32.7	7.3	2.6	0.3	0	1.95	1.12	0.25	0.09	0.01	0	3.86	120	36.5	94.6	329	31.1	44.4	12.9	155	11.5	14.2
Y241	50	1	male	Minimally invasive interventional Department	2020-10-1313:21:28	1	0	0	0	0	1. Liver cysts; 2. Hyperlipidemia.	The shape of the liver section is normal, the volume is not large, the echo distribution in the liver is uneven, the first half is thickened and enhanced, the second half is sparse and attenuated, the intrahepatic pipeline structure is faintly visible, and the liver surface is fuzzy. An anechoic area can be seen in the left lobe of the liver, with a size of about 10 × 8mm, a quasi circular shape,…	None	None	1	1	1	10	1	28	74	46.1	None	15.5	2.7	4.39	56	35.8	7.5	0.5	0.2	0	2.46	1.57	0.33	0.02	0.01	0	5.15	154	44.8	87	344	29.9	39	12.3	237	10.3	12.2
Y242	62	1	male	Hepatobiliary pancreatic surgery	2020-10-1509:49:10	0	0	0	0	0	Hepatic space occupying lesions	None	None	The surface of liver is smooth and the proportion of each lobe is even. A slightly longer T1 and T2 signal shadow can be seen in liver S5, with a range of about 29 × 32mm. It shows high signal on DWI and slightly low signal on ADC. The enhancement in arterial phase is obviously uneven, and the enhancement degree in portal phase and delayed phase is reduced, which is still slightly higher than the…	1	1	0	32	2	35	74.2	42.3	None	19.7	3	7.96	56.3	31.9	8.7	2.3	0.8	0	4.49	2.54	0.69	0.18	0.06	0	5.86	165	49.4	84.3	334	28.2	39.1	12.8	219	11.2	14
Y243	40	0	male	Hepatobiliary pancreatic surgery	2020-10-1510:01:36	1	0	0	0	1	Hepatic space occupying lesions	The shape and size of the liver section are normal, the echo of the capsule is regular, the echo of the liver parenchyma is thickened, and the distribution is uneven. A hyperechoic mass can be seen in the right lobe of the liver, the size is about 45 × 38mm, the shape is quasi circular, the edge is not clear, and the internal echo is uneven. CDFI: streaky blood flow signals can be seen around and…	None	None	1	1	0	45	2	30	62.8	40.7	None	8.9	2	4.73	41	43.1	12.3	3.2	0.4	0	1.94	2.04	0.58	0.15	0.02	0	4.17	136	40.7	97.6	334	32.6	44.3	12.2	138	11.1	12.5
Y245	43	1	male	Hepatobiliary pancreatic surgery	2020-10-1809:48:46	0	0	0	0	0	Hepatic space occupying lesions	None	None	The shape of the right lobe of the liver is slightly swollen, the density of its inner parenchyma is not uniform, and a patchy irregular low-density shadow can be seen, with a clear boundary, about 87mm × 120mm × 117mm in size (anteroposterior diameter * transverse diameter * upper and lower diameter), and the CT value is about 34hu. The edge of the lesion and its internal separation in the enhan…	2	0	1	120	2	18	68.7	39.5	None	15.7	2.7	7.67	65.4	19.3	9.3	5.6	0.4	0	5.02	1.48	0.71	0.43	0.03	0	4.53	132	39.8	87.9	332	29.1	37.1	11.6	166	11.8	15.6
Y246	75	1	male	Minimally invasive interventional Department	2020-10-2010:40:00	1	1	0	0	0	1. intrahepatic space occupying: liver cancer? 2. cryptogenic cirrhosis (decompensated stage) 3. cardiac function grade I after PCI for coronary heart disease (Killip grade) 4. hyperlipidemia 5. carotid atherosclerosis 6. cholecystitis	The morphology of the liver section was abnormal, the right lobe was narrowed, the left lobe was enlarged, the surface of the liver envelope was not smooth, the front end of the liver margin was blunt, the echo in the liver was thickened and enhanced, and the distribution was uneven. No obvious localized mass echo was found. The inner diameter of the main portal vein is about 7mm. The gallbladder…	None	The liver volume is reduced, the surface is wavy, the proportion of liver lobes is imbalanced, the left lobe is slightly increased, the right lobe is relatively reduced, the density in the liver is not uniform, the liver S6 shows punctate high-density shadow, the enhanced scan of liver S4, S7, 8 near the porta hepatis shows patchy abnormal enhancement shadow, and the enhancement degree in portal …	1	1	0	62.0	2	77	72.4	34.8	233	29.1	9.8	2.7	53.4	27	8.1	10.4	1.1	0	1.44	0.73	0.22	0.28	0.03	0	3.92	132	39.2	100	337	33.7	55.7	15.4	53	12.6	16.9
Y247	39	0	female	Minimally invasive interventional Department	2020-10-2209:58:28	0	0	0	0	0	Hepatic space occupying lesions	The shape and size of the liver section are normal, and the echo in the liver is uneven. A hypoechoic nodule can be seen under the S2 envelope of the liver, about 19 × 10mm in size, oval in shape, with uneven internal echo, unclear boundary, regular edge, no change in the rear echo, and no displacement of the blood vessels in the liver. CDFI: streaky blood flow signals can be seen around and insi…	None	None	4	0	0	19	1	8	69.2	40	None	8.8	1.4	6.98	49.3	40.4	6	3.9	0.4	0.1	3.44	2.82	0.42	0.27	0.03	0.01	4.21	126	38.6	91.7	326	29.9	39.7	11.8	247	10.3	11.8
Y249	54	1	male	Medical oncology	2020-10-2700:00:00	1	0	0	0	1	1. Hepatic space occupying lesions	The right lobe of the liver section is full in shape, the surface of the liver envelope is smooth, and the echo distribution in the liver is uneven. A substantial mass can be seen in the right lobe of the liver, about 112 × 94mm in size, oval in shape, hypoechoic inside, a few anechoic areas can be seen inside, the edge is not clear, the echo in the rear is weakened, there is a sound halo around,…	None	None	1	1	0	112	2	41	75.5	44.3	278	18.9	3.4	6.7	58.3	31.5	6	3.3	0.9	0	3.91	2.11	0.4	0.22	0.06	0	5.48	151	47.6	86.9	317	27.6	45.7	14.4	212	11.2	13.7
Y250	64	0	female	Hepatobiliary pancreatic surgery	2020-10-2810:09:09	0	1	0	0	1	Hepatic space occupying lesions	None	The liver volume was reduced, the surface was wavy, and the intrahepatic density was not uniform. An irregular wedge-shaped slightly low-density shadow with unclear boundary can be seen in S4, 5, and 8 of the liver. The local liver margin is slightly concave, with a size of about 57 × 42 × 42mm. During the arterial phase of enhancement, it is obviously uneven circular, nodular enhancement, and th…	None	1	1	0	57	2	19	65.6	38.1	None	30.5	6.3	4.39	51	32.8	8	7.1	1.1	0	2.24	1.44	0.35	0.31	0.05	0	4.3	133	39.6	92.1	336	30.9	44.8	13.2	96	13.6	18.7
Y252	49	0	female	Hepatobiliary pancreatic surgery	2020-11-0310:09:09	0	0	0	0	0	1. Hepatic hemangioma; 2. Hypertension; 3. After thyroidectomy	The shape and size of the liver section are normal, the echo in the liver is uneven, the first half is slightly thickened and enhanced, the second half is slightly sparse and attenuated, the intrahepatic pipeline structure is not clear, and the extrahepatic surface still exists. A slightly hyperechoic mass can be seen in the left lobe of the liver, about 87 × 69mm in size, with a quasi circular s…	None	The surface of liver is smooth and the proportion of each lobe is uniform; A kind of circular abnormal signal shadow can be seen in the left lobe of the liver, showing low T1WI, high t2spair and high DWI signals. The internal signal is not uniform, and patches of longer T2 signal shadow can be seen, with clear boundary; The size is about 72mm*81mm*67mm; On contrast-enhanced scan, the lesions show…	2	0	1	87	2	17	62.7	35.7	None	10.3	2	7.25	77.2	16.1	4.6	1.8	0.3	0	5.6	1.17	0.33	0.13	0.02	0	4.62	125	38.6	83.5	324	27.1	43.8	14.5	257	10.5	10.5
Y255	50	0	female	Hepatobiliary pancreatic surgery	2020-11-1709:57:26	0	0	0	0	0	1. liver space occupying lesions: hemangiomas 2. gallbladder polyps 3. liver cysts	None	None	None	4	0	1	62.0	2	10	73.7	41.3	None	11.2	6.9	3.35	51.9	37.9	8.4	1.2	0.6	0	1.74	1.27	0.28	0.04	0.02	0	4.39	126	38.2	87	330	28.7	40.9	12.8	165	10.9	13.1
Y256	73	1	male	Hepatobiliary pancreatic surgery	2020-11-2109:43:52	1	0	0	0	0	Hepatic space occupying lesions	The shape of the liver section is normal, the volume is not large, the echo distribution in the liver is uneven, the first half is slightly thickened and enhanced, the second half is slightly sparse and attenuated, a substantial mass can be seen in the right posterior lobe of the liver, the size is about 75 × 70mm, the shape is irregular, the interior is hypoechoic, the distribution is uneven, th…	None	None	1	1	0	75	2	61	66.8	36.7	None	23.7	6.4	7.25	68.1	12.7	16	2.5	0.7	0	4.94	0.92	1.16	0.18	0.05	0	3.76	131	39.6	105.3	331	34.8	43.6	11.3	257	9.5	10
Y257	77	0	female	Hepatobiliary pancreatic surgery	2020-11-2109:47:38	0	0	0	0	0	1. liver cyst; 2. after cholecystectomy	None	Multiple oval like low-density shadows of different sizes were seen in the liver, the larger one was about 113mm in diameter, the CT value was about 13.5hu, and the boundary was clear; The density of the remaining liver parenchyma was uniform; The gallbladder is not clear	None	4	0	1	113	2	10	67.2	36.6	None	10.5	1.8	5.74	58.2	28.7	7.7	4.9	0.5	0	3.34	1.65	0.44	0.28	0.03	0	4.23	121	37.2	87.9	325	28.6	41	12.7	145	10.2	11.2
Y258	66	1	male	Hepatobiliary pancreatic surgery	2020-11-2309:57:24	0	0	0	0	0	Hepatic cyst	None	The liver edge is smooth, the proportion of liver lobes is coordinated, the liver fissure is not wide, and the quasi circular low-density shadow is scattered in the liver. The larger one is located in the junction area of S4 and 8, and the size is about 90mm × 71mm. The edge is clear, and the CT value is about 24hu. The hepatic S7 shows punctate high-density shadow, the intrahepatic and extrahepa…	None	4	0	1	90	2	11	65	36.7	None	15.4	3.4	5.1	66	25.5	6.9	1.2	0.4	0.2	3.37	1.3	0.35	0.06	0.02	0.01	4.38	136	40.3	92	337	31.1	40	11.9	201	10.9	13.4
Y264 (wrong start of blood routine)	62	0	female	Hepatobiliary pancreatic surgery	2020-12-0610:05:41	0	0	0	0	0	Hepatic space occupying lesions	The shape and size of the liver section are normal, and the echo in the liver is uneven. A hypoechoic mass with a size of about 89 × 74mm can be seen in the S4 segment of the liver. The shape is irregular, the internal echo is uneven, the boundary is not clear, the edge is regular, and the rear echo is unchanged. A hypoechoic nodule with a size of 19 × 15mm can be seen in the hilar region, and th…	The size and morphology of each lobe of the liver are normal, the edge is smooth, a huge irregular circular low-density shadow can be seen in the S4 segment of the liver, the boundary is still clear, the internal density is not uniform, the CT value is 30-42hu, the size is about 69 × 73mm, the edge and solid part of the lesion show obvious progressive enhancement on enhanced scan, the CT value is…	None	1	1	0	89	2	29	72.9	45.2	None	10.2	2.5	8.55	60.4	27.8	6.9	4.3	0.6	0.1	5.16	2.38	0.59	0.37	0.05	0.01	5.95	109	35.4	59.5	308	18.3	33.7	17.5	247	10.7	12.4
Y265	67	1	male	Hepatobiliary pancreatic surgery	2020-12-0610:16:18	0	0	0	0	0	Hepatic space occupying lesions	None	A huge soft tissue mass, about 123*123*110mm, can be seen in the right lobe of the liver. Patchy high-density shadows can be seen in it, and patchy high-density shadows can be seen in S7 and S8 of the liver; A round like low-density shadow with a diameter of about 6mm was seen in S2 of liver; The subcapsular density of S3 segment of liver is not uniform	None	2	0	0	123	2	17	60.7	35	None	21.5	5.1	5.8	81.4	11.2	3.8	3.3	0.3	0	4.72	0.65	0.22	0.19	0.02	0	5.27	161	50.2	95.3	321	30.6	45.6	12.9	215	10.8	13
Y266	55	0	female	Hepatobiliary pancreatic surgery	2020-12-0709:44:18	0	0	0	0	0	Multiple cysts of liver; Multiple cysts of both kidneys	The morphology of the liver section is normal, and the echo distribution in the liver is uneven. Multiple anechoic areas with different sizes can be seen in the liver, the larger one is about 192 × 148 × 163mm, the shape is quasi circular, and the inner part is an anechoic area with clear boundary, thin wall, and posterior echo enhancement. The intrahepatic duct structure was clearly displayed	None	None	4	0	1	192	2	19	69.1	40.1	None	13.4	2.4	10.7	73.9	17.8	7.2	0.8	0.3	0	7.91	1.9	0.77	0.09	0.03	0	4.5	137	40.6	90.2	337	30.4	39.2	11.9	190	11.3	14.5
Y267	69	1	male	Hepatobiliary pancreatic surgery	2020-12-0809:30:37	0	0	0	0	1	Hepatic space occupying lesions	None	The liver edge is smooth, the proportion of liver lobes is coordinated, the liver fissure is not wide, a low-density shadow can be seen under the liver S5 envelope, the boundary is not clear, and the size is about 21 × 22mm. After enhancement, the early lesions of artery show patchy enhancement, the density of lesions in venous phase is slightly lower than that of normal liver parenchyma, and it …	None	1	1	0	22	1	39	71.1	40.8	None	16.2	3.3	4.37	53.3	37.8	6.6	1.8	0.5	0	2.33	1.65	0.29	0.08	0.02	0	5.15	163	47.8	92.8	341	31.7	42.9	12.4	92	11	14.6
Y270	61	1	male	Minimally invasive interventional Department	2020-12-1800:00:00	1	0	0	0	0	1. Hepatic space occupying lesions	None	Huge lumpy masses can be seen in the right lobe and left inner lobe of the liver.	The liver volume was significantly increased, and a huge abnormal signal mass in the right lobe occupied the entire right lobe of the liver, with a size of about 202mm × 115mm × 190mm (long diameter × short diameter × upper and lower diameter), showing a long T1 and long T2 signal, and multiple cystic lesions with longer T1 and longer T2 were seen in it. The lesions showed progressive enhancement…	1	1	0	202	2	19	67.3	41.1	None	39.6	6.7	4.8	45	43.5	9.2	1.5	0.8	0	2.16	2.09	0.44	0.07	0.04	0	4.2	122	38.4	91.4	318	29	42.1	12.8	165	10	10.8
Y271 (?)	62	1	male	Minimally invasive interventional Department	2020-12-1910:40:24	0	0	0	0	0	1. hepatic hemangioma; 2. hypertension	None	The liver volume was increased and the morphology was normal. A huge slightly low-density space occupying lesion could be seen in the right lobe of the liver. The density distribution was uneven, and patchy low-density shadows could be seen. The enhancement mode of enhanced scanning was gradual and uneven enhancement, gradually filling into the center of the lesion, and the low-density shadows in…	The liver volume was significantly increased, and a huge abnormal signal mass in the right lobe occupied the entire right lobe of the liver, with a size of about 202mm × 115mm × 190mm (long diameter × short diameter × upper and lower diameter), showing a long T1 and long T2 signal, and multiple cystic lesions with longer T1 and longer T2 were seen in it. The lesions showed progressive enhancement…	4	0	1	202	2	19	67.3	41.1	None	39.6	6.7	4.8	45	43.5	9.2	1.5	0.8	0	2.16	2.09	0.44	0.07	0.04	0	4.2	122	38.4	91.4	318	29	42.1	12.8	165	10	10.8
Y274	64	1	male	Minimally invasive interventional Department	2020-12-2510:00:07	1	0	0	0	0	Hepatic space occupying lesions	None	The size and morphology of each lobe of the liver are normal, the edges are smooth, the liver near the top of the diaphragm, S4, S5, S6, S7 and S8 are scattered with patchy low-density foci, the boundary is not clear, the diameter is about 9-29mm, the larger is located in the 5/8 junction of the liver, the size is about 29mm × 16mm, the edge of the lesion is nodular enhancement in the enhanced ar…	None	4	0	0	29	1	12	64.1	39.7	None	13.7	3.2	6.87	60.5	30.1	7.1	1.6	0.7	0	4.15	2.07	0.49	0.11	0.05	0	4.1	133	39.8	97.1	334	32.4	45.5	12.8	316	10.7	12.3
Y275	56	1	male	Hepatobiliary pancreatic surgery	2020-12-2810:31:36	0	0	0	0	0	Hepatic space occupying lesions	The shape of the liver section is normal, and the echo distribution in the liver is uneven. Multiple echo free areas can be seen in the liver, with different sizes. The larger one is about 68 × 64mm, and the shape is quasi circular. The interior is an echo free area, with clear boundaries, thin walls, and enhanced rear echo. A number of slightly hyperechoic masses, about 14 × 14mm in size, are se…	None	The liver surface is smooth, and the proportion of each lobe is uniform. Multiple cystic long T1 long T2 signal shadows of different sizes are seen in the liver, with clear edges. The larger one is located at the junction of s5/8 of the liver, with a size of about 68 × 57 × 70mm (section × height diameter). No enhancement is seen on enhanced scan. A cystic long T1 long T2 signal shadow was seen i…	4	0	1	68	2	10	64	36.9	None	10.2	2.1	5.73	52	33	12.4	1.9	0.7	0.2	2.98	1.89	0.71	0.11	0.04	0.01	4.98	156	46.7	93.8	334	31.3	44.1	12.7	247	9.4	10.2
Y276	59	1	male	Endoscopic hepatobiliary surgery	2020-12-2916:47:00	0	0	0	1	0	1. Hepatic space occupying lesions	The shape and size of the liver section are normal, the echo distribution in the liver is uneven, and a hypoechoic area can be seen in the right lobe of the liver, with a size of about 125 × 113mm, irregular shape, uneven distribution, unclear boundary, no change in the rear echo, and displacement of the blood vessels in the liver. A hypoechoic area can be seen in the left lobe of the liver, abou…	None	The liver margin is still smooth, the liver fissure is not widened, and a huge mass with a size of about 10.1 × 8.3 × 10.0cm long T1 long T2, DWI high signal ADC low signal can be seen in the right lobe of the liver, the central signal is uneven, showing short T2 changes, the edge is lobulated, the peripheral bile duct is slightly dilated, the dynamic enhancement lesion is obviously uneven ring e…	1	1	0	124	2	63	53.9	28.8	None	37.1	14.3	5.93	74.3	12.8	11.5	0.7	0.7	0	4.41	0.76	0.68	0.04	0.04	0	3.12	100	29.7	95.2	337	32.1	53	15.2	124	11.5	14.8
Y277	31	0	female	Hepatobiliary pancreatic surgery	2021-01-0409:22:28	0	0	0	0	0	Hepatic space occupying lesions	The shape and size of the liver section are normal, and the echo in the liver is uneven. Three slightly hyperechoic masses can be seen in the liver, which are about 87 × 61mm (S7), 67 × 47mm (S6), 15 × 12mm (S8), and are quasi circular in shape. The internal echo is uneven, the boundary is clear, the edge is regular, the rear echo is unchanged, and the blood vessels in the liver are not displaced…	Each lobe of the liver is normal in size and morphology, with smooth edges. Multiple quasi circular low-density shadows are seen in the right lobe of the liver. The larger one is located in S7 of the liver, and the plain scan density is still uniform. The CT value is about 44hu, and the larger one is about 97 × 72mm in size. Obvious nodular uneven enhancement is seen at the edge of the lesion in …	None	3	0	1	97	2	16	64.1	40.5	None	9	1.5	6.42	59.6	32.6	5.8	1.4	0.6	0	3.83	2.09	0.37	0.09	0.04	0	4.43	134	41.4	93.5	324	30.2	45.3	13.2	282	10.3	11.6
Y279	37	0	male	Hepatobiliary pancreatic surgery	2021-01-0510:16:55	0	0	0	0	0	1. hepatic hemangioma 2. gallbladder adenomyosis 3. mild fatty liver 4. postoperative mediastinal neurofibroma	The shape of the liver section is normal, the volume is not large, the echo distribution in the liver is uneven, the first half is slightly thickened and enhanced, the second half is slightly sparse and attenuated, two hypoechoic masses can be seen in the liver S6, the range is about 65 × 44mm and 24 × 12mm respectively, the shape is irregular, the boundary is not clear, the internal echo is unev…	None	The surface of liver was smooth, and the left lobe of liver was extended and enlarged; Liver S6 showed patchy abnormal signal shadow, about 64mm × 42mm × 30mm in size, showing T1 low, T2 high, DWI high signal, part of the ADC decreased, the internal signal was not uniform, the boundary was clear, small patchy slightly short T1 slightly short T2 signal shadow could be seen around, the lesions show…	3	0	0	64	2	53	68.8	43.5	None	15.6	2.7	7.46	48.7	36.7	6.2	6.7	1.7	0	3.63	2.74	0.46	0.5	0.13	0	4.92	155	46.5	94.5	333	31.5	40	11.6	273	10.6	12.9
Y280	44	0	female	Hepatobiliary pancreatic surgery	2021-01-0909:40:37	0	0	0	0	0	Hepatic space occupying lesions: Hemangiomas	The shape and size of the liver section are normal, and the echo in the liver is uneven. Multiple parenchymal mass echoes can be seen in the right lobe of the liver, varying in size, up to 54 × 51mm, in a quasi circular shape, with high echo inside, uneven distribution, clear boundary, regular edge, no change in the rear echo, and no displacement of the blood vessels in the liver.	None	None	4	0	1	54	2	6	66.8	39.8	None	13.9	2.8	5.86	57.9	30	8.7	2.4	1	0	3.39	1.76	0.51	0.14	0.06	0	4	120	37.5	93.8	320	30	45.3	13.1	251	10.7	12.1
Y282	72	1	male	Hepatobiliary pancreatic surgery	2021-01-1110:07:29	0	1	0	0	1	Hepatic space occupying lesions	The shape and size of the liver section are normal, the capsule is not smooth, the echo of the liver parenchyma is thickened, and the distribution is uneven. Isoechoic masses with a size of about 36 × 27mm can be seen in s2/3 of the liver, which are oval like, the boundary is still clear, low echo halos can be seen around, the internal echo is not uniform, CDFI: short strip like blood flow signal…	The liver edge is irregular, the edge is wavy, and the caudate lobe of the liver is atrophic; A kind of circular slightly low-density shadow can be seen in the left outer lobe of the liver, the boundary is not clear, the size is about 29mm × 27mm, the internal density is not uniform, the CT value is about 50hu, the nodular enhancement can be seen inside the lesion in the arterial phase, the CT va…	None	1	1	0	36	2	12	77.2	44.6	None	21.5	3.9	7.24	50.2	40.1	7.2	2.2	0.3	0	3.64	2.9	0.52	0.16	0.02	0	4.26	152	45.1	105.9	337	35.7	45.7	11.7	86	14.1	23.7
Y283	24	0	male	Hepatobiliary pancreatic surgery	2021-01-1209:48:49	0	0	0	0	0	Hepatic space occupying lesions	The shape of the liver section is normal, the volume is not large, the echo distribution in the liver is uneven, the first half is slightly thickened and enhanced, the second half is slightly sparse and attenuated, a slightly low echo mass of 60x47mm in size can be seen at the junction of the left and right lobes, the boundary is clear and the interior is not uniform, the intrahepatic pipeline st…	None	None	1	1	1	60	2	80	70.3	43.9	None	11.7	2.3	6.72	46.3	39.7	10	3.3	0.7	0	3.11	2.67	0.67	0.22	0.05	0	4.81	141	44.6	92.7	316	29.3	42.2	12.4	217	12.5	16.5
Y285	67	1	male	Hepatobiliary pancreatic surgery	2021-01-1409:28:26	0	0	0	0	0	Hepatic space occupying lesions	The shape and size of the liver section are normal, and the echo in the liver is uneven. A solid mass can be seen in s6/s7 of the liver, about 67 × 53mm in size, oval in shape, with clear boundary, medium echo inside, low echo halo around, uneven distribution, and no obvious change in the rear echo. CDFI: circular strip blood flow signal around the mass, see short strip blood flow signal inside.	A slightly low-density mass of 62*56mm can be seen in the right lobe of the liver, and the CT value is about 44hu. Multiple round like high-density shadows can be seen in the gallbladder, and the larger ones are about 9mm in diameter	None	1	1	1	67	2	22	64.7	38.1	None	25.5	4.6	5.88	64.3	26.7	7.8	0.9	0.3	0	3.78	1.57	0.46	0.05	0.02	0	4.86	144	44.4	91.4	324	29.6	39.5	11.8	290	9.2	10.1
Y286	30	0	female	Hepatobiliary pancreatic surgery	2021-01-1610:04:08	0	0	0	0	0	Intrahepatic space occupying: Hemangioma	None	Each lobe of the liver is normal in size and morphology, with smooth edges. A class of oval slightly low-density foci can be seen at the junction of s4-5 and S8, with clear boundaries. The density in the area is not uniform. The CT value is about 47hu, and the size is about 9.6 × 6.9 × 7.7cm. The lesions in the enhanced arterial phase show obvious nodular uneven enhancement, the enhancement range…	None	2	0	1	96	2	30	63.1	36.7	None	9.7	1.9	5.71	52.7	36.6	8.9	1.6	0.2	0	3.01	2.09	0.51	0.09	0.01	0	4.81	103	34	70.7	303	21.4	37.6	14.9	250	10.8	14.3
Y288	43	0	female	Hepatobiliary pancreatic surgery	2021-01-1911:42:33	0	1	0	0	0	Hepatic space occupying lesions	None	None	None	4	0	1	62.0	2	11	65.6	37.7	None	8	1.4	8.56	58.9	29.3	8.8	2.3	0.7	0	5.04	2.51	0.75	0.2	0.06	0	4.57	128	40.5	88.6	316	28	45.6	14.1	239	11.4	13
Y295	51	1	male	Minimally invasive interventional Department	2021-01-3110:07:14	0	1	0	0	1	Hepatic space occupying lesions	The morphology of the liver section was abnormal, the volume of the right lobe was reduced, the left lobe was increased, the surface of the liver capsule was not smooth, the front end of the liver margin was blunt, the echo in the liver was thickened and enhanced, and the distribution was uneven. No obvious localized mass image was found in the liver.	None	None	4	0	0	62.0	2	18	68.7	33.1	None	14.7	4.4	3.82	68.1	19.1	9.7	2.6	0.5	0	2.6	0.73	0.37	0.1	0.02	0	3.54	107	31.9	90.1	335	30.2	40.3	12.3	228	9.9	11.1
Y296	49	1	male	Endoscopic hepatobiliary surgery	2021-01-3112:39:34	1	0	0	0	1	1. Hepatic space occupying lesions	The shape of the liver section is normal, the volume is not significantly reduced, the surface of the liver envelope is smooth, the front end of the liver margin is slightly blunt, the echo in the liver is thickened and enhanced, and the distribution is uneven. A parenchymal mass with a size of about 28 × 21mm and regular shape can be seen in the S5 of the right lobe of the liver. The interior is…	The liver edge is smooth, the proportion of liver lobes is coordinated, and the liver fissure is not wide. A kind of round slightly low-density shadow with a size of about 24 × 28mm can be seen in liver S5. The enhancement in arterial phase is obviously uneven, and the enhancement in portal phase and parenchymal phase is reduced, showing a relatively low density. No abnormal density foci were fou…	None	1	1	1	28	1	43	61.2	38.7	None	5.4	1.1	5.84	46.6	40.1	8.9	3.9	0.5	0.2	2.72	2.34	0.52	0.23	0.03	0.01	4.63	150	44	95	341	32.4	43.7	12.6	119	11.4	14.4
Y299	44	0	female	Hepatobiliary pancreatic surgery	2021-02-2609:48:48	0	0	0	0	0	Hepatic space occupying lesions	The shape and size of the liver section are normal, and the echo in the liver is uneven. Multiple (4-5) slightly hyperechoic masses with different sizes can be seen in the liver, which are about 47 × 63mm (caudate lobe) and 37 × 29mm (s7/8). The shape is oval, the internal echo is uneven, the boundary is clear, and the edge is regular. The echo in the rear is unchanged, and the blood vessels in t…	Multiple patchy low-density shadows can be seen in the upper segment of the right posterior lobe, caudate lobe and left outer lobe of the liver, among which spotted high-density shadows can be seen in the lesions of the upper segment of the right posterior lobe and caudate lobe. The boundary of plain scan can be identified, and the CT value is about 41hu. After dynamic contrast-enhanced, the peri…	None	4	0	1	63	2	8	67.4	36.8	None	14.3	2.5	2.52	50	32.9	11.5	4.8	0.8	0	1.26	0.83	0.29	0.12	0.02	0	3.66	115	34.4	94	334	31.4	40.8	11.8	168	10.8	13
Y302	56	0	female	Hepatobiliary pancreatic surgery	2021-03-0510:09:17	0	0	0	0	0	1. liver space occupying lesions 2. chronic gastritis	None	The liver edge was smooth, the proportion of liver lobes was coordinated, the liver fissure was not wide, multiple cystic low-density shadows of different sizes were seen in the liver, the larger ones were located under the capsule of the right posterior lobe, the size was about 82 × 63 × 75mm, the CT value was about 5HU, the boundary was clear, and no enhancement was seen in the multi-phase scan…	None	4	0	0	82	2	15	63.2	35.8	None	12.1	1.7	4.8	54.2	36.5	8.3	0.6	0.4	0	2.6	1.75	0.4	0.03	0.02	0	4	124	38.8	97	320	31	40.7	11.4	206	9.7	10.4
Y303	54	1	male	Minimally invasive interventional Department	2021-03-1700:00:00	0	0	0	0	1	Hepatic space occupying lesions	Two slightly hypoechoic masses with sizes of 81 × 72mm and 39 × 38mm were found in the liver	None	None	2	0	1	81	2	37	50.1	29.9	None	12.2	2.8	10.93	78	14.5	7.1	0.2	0.2	0	8.53	1.58	0.78	0.02	0.02	0	3.13	100	30.9	98.7	324	31.9	45.6	12.7	164	11.1	13
Y305	39	0	male	Hepatobiliary pancreatic surgery	2021-03-1810:13:21	0	0	0	0	1	Hepatic space occupying lesions	None	The liver edge is smooth, the proportion of liver lobes is coordinated, the liver fissure is not wide, the liver S2 can see a round like slightly low-density shadow with a diameter of about 4mm, and no enhancement is seen in all phases of enhanced scanning. Punctate high-density shadow can be seen in liver S7. The shape of intrahepatic blood vessels was normal, and there was no dilatation of intr…	None	1	1	0	4	1	23	68	41.8	None	18.8	2.8	5.95	47.9	43.4	7.4	0.8	0.5	0	2.85	2.58	0.44	0.05	0.03	0	5.06	153	46.3	91.5	330	30.2	39.8	11.9	241	10.4	13
Y306	83	1	male	Minimally invasive interventional Department	2021-03-1910:28:18	0	0	0	0	0	Hepatic cyst	Multiple anechoic areas with different sizes can be seen in the liver. The larger one is about 84 × 76 × 73mm (right posterior lobe), oval, well-defined, thin wall, and the posterior echo is enhanced.	None	None	4	0	1	84	2	20	60.7	39	33	18	3.2	6.02	60.4	24.9	8	6	0.7	0	3.64	1.5	0.48	0.36	0.04	0	3.45	115	35	101.4	329	33.3	52.6	14.4	222	10.5	12.5
Y310	71	1	male	Hepatobiliary pancreatic surgery	2021-03-2409:58:21	0	0	0	0	0	Hepatic space occupying lesions	None	The liver volume is not large, and the surface is not smooth. A slightly low-density shadow of about 77 × 95mm can be seen in the right liver, and patchy lower density shadow can be seen inside. The arterial phase of enhanced scan shows uneven and obvious enhancement, the peripheral enhancement is obvious, the boundary is clear, and the lesions are still enhanced in the venous phase, showing low …	None	1	1	1	95	2	27	64.8	37.3	None	12.4	2.8	4.04	57.4	31.7	8.9	1.5	0.5	0	2.32	1.28	0.36	0.06	0.02	0	4.04	132	41	101.5	322	32.7	45.9	12.2	150	10.6	11.7
Y312	53	1	male	Hepatobiliary pancreatic surgery	2021-03-2710:10:43	0	0	0	0	0	Hepatic space occupying lesions	The shape and size of the liver section are normal, the echo in the liver is uneven, and several slightly hyperechoic masses can be seen in the liver, about 109 × 72mm (lower segment of the right posterior lobe), which are quasi circular in shape, with uneven internal echo, clear boundary, regular edge, no change in the rear echo, and no displacement of the blood vessels in the liver. CDFI: a few…	A large low-density lesion was seen at the junction of the left and right lobes of the liver. Most of the lesion was located in the right lobe, and the size was about 99mm × 75mm × 89mm (section × upper and lower diameter). A lower density shadow could be seen in the center of the lesion. In the enhanced arterial phase, the lesion edge showed nodular enhancement, and in the portal venous phase an…	None	4	0	1	109	2	20	59	37.6	None	16.4	2.7	3.21	48.1	43.9	6.2	1.2	0.6	0	1.54	1.41	0.2	0.04	0.02	0	4.29	140	41.7	97.2	336	32.6	43.4	12.2	175	10	11.7
Y314	39	0	male	Hepatobiliary pancreatic surgery	2021-03-2910:05:38	1	0	0	0	0	Hepatic space occupying lesions	None	The size and morphology of each lobe are normal, and the edge is smooth. A large and slightly low-density space occupying lesion can be seen in the left lobe, the size is about 82 × 60mm, the boundary is clear, and the CT value is about 47hu. Obvious nodular uneven enhancement can be seen at the edge of the lesion in the enhanced arterial phase, slightly high density in the portal venous phase an…	None	4	0	1	82	2	14	62.8	40.9	None	15.2	2.8	4.02	55	33.8	8.2	2.5	0.5	0	2.21	1.36	0.33	0.1	0.02	0	4.95	143	44.7	90.3	320	28.9	40.1	12.1	174	11.3	14
Y317	43	0	female	Hepatobiliary pancreatic surgery	2021-04-0609:58:13	0	0	0	0	0	Hepatic cyst	None	The liver edge is smooth, the proportion of liver lobes is harmonious, the liver fissure is not wide, a kind of oval low-density shadow can be seen in the liver S5, the boundary is clear, the size is about 100 × 71 × 89mm (section × height diameter), the CT value is about 25hu, no abnormal density foci are found in the remaining liver parenchyma, there is no expansion of intrahepatic and extrahep…	None	1	1	1	100	2	8	65.8	36.6	None	11.2	4.3	4.19	44.1	41.3	10.5	3.1	1	0	1.85	1.73	0.44	0.13	0.04	0	3.66	110	35.5	97	310	30.1	46.4	13	182	12	14.1
Y319	66	1	male	Hepatobiliary pancreatic surgery	2021-04-1409:45:49	0	0	0	0	1	1. left liver space occupying lesions: primary liver cancer? Metastatic liver cancer? 2. after comprehensive treatment of descending colon adenocarcinoma (pt4an0m0iib stage) 3. chronic hepatitis B 4. multiple cysts in the liver 5. multiple cysts in the kidney 6. after left femur surgery	The morphology of the liver section is basically normal, the surface of the liver envelope is smooth, and the echo distribution in the liver is uneven. A hypoechoic mass can be seen in the left outer lobe of the liver, about 46 × 29mm in size, regular in shape, hypoechoic inside, uneven in distribution, a small amount of anechoic area can be seen, the edge is clear, the posterior echo is attenuat…	None	The surface of liver is smooth and the proportion of each lobe is even. An abnormal signal focus with a size of about 40 × 41 × 45mm can be seen in S2 of liver, showing slightly low T1WI, high t2spair, high signal on DWI, slightly high signal on ADC, clear boundary, small nodular slightly short T1 long T2 signal shadow can be seen inside, the lesion in dynamic enhanced arterial phase is significa…	1	1	1	46	2	17	70.9	37	None	25.1	6.1	3.37	44	33.5	14.8	7.1	0.6	0	1.48	1.13	0.5	0.24	0.02	0	4.1	138	41.1	100.2	336	33.7	81.1	22.3	80	10.6	11.9
Y320	39	0	female	Minimally invasive interventional Department	2021-04-1512:25:54	0	0	0	0	0	1. hepatic hemangioma; 2. splenomegaly	None	The liver edge is smooth, the S2 of the liver extends to the left and reaches the side of the spleen, the liver fissure is not wide, and multiple low-density foci can be seen in the liver. The larger one is located in S2, and the size is about 62mm × 55mm (anterior posterior × transverse diameter). Spot like and nodular enhancement can be seen at the edge of the lesion in the enhanced arterial ph…	None	4	0	1	62	2	11	73.7	44.8	None	15.6	2.5	3.11	49.5	39.2	10	1.3	0	0	1.54	1.22	0.31	0.04	0	0	4.06	125	38.4	94.6	326	30.8	42.8	12.4	155	10.6	12.2
Y323	53	0	female	Hepatobiliary pancreatic surgery	2021-04-2010:17:25	0	0	0	0	0	1. huge cyst of liver 2. bronchiectasis of right lower lung 3. after cesarean section	None	None	None	4	0	1	62.0	2	11	62.2	35.1	None	5.4	0.9	6.38	59.3	26.6	10.7	2.8	0.6	0	3.78	1.7	0.68	0.18	0.04	0	3.33	90	30	90.1	300	27	47.9	14.5	287	11.1	11.8
Y324	52	1	male	Hepatobiliary pancreatic surgery	2021-04-2110:30:53	0	0	0	1	1	1. liver space occupying lesions 2. Type II diabetes 3. chronic hepatitis B	The shape of the liver section is normal, the volume is not significantly reduced, the surface of the liver capsule is smooth, and the echo in the liver is slightly thickened and enhanced, with uneven distribution. A hypoechoic mass with a size of about 21 × 17mm and regular shape can be seen in the S5 segment of the right lobe of the liver next to the gallbladder. The interior is hypoechoic and …	None	None	1	1	1	21	1	23	66.3	38.1	None	14	3	3.95	39.9	41.3	16.5	2	0.3	0	1.58	1.63	0.65	0.08	0.01	0	4.31	142	42.8	99.3	332	32.9	44	11.9	136	10.7	12.1
Y325	32	0	male	Hepatobiliary pancreatic surgery	2021-04-2209:37:21	0	0	0	0	0	Hepatic cyst	None	The size and morphology of the liver were normal, and the edge was smooth. A class of circular cystic low-density shadow was seen under the liver S5 capsule, with a size of about 104 × 104 × 146mm (section × height diameter). Small nodular high-density shadow was seen on the edge and part of the capsule wall. No enhancement was seen in all phases of the enhanced scan; The density of the remaining…	None	1	1	1	146	2	52	67.9	41.9	None	14.5	2.1	7.62	50.3	38.7	7	3.3	0.7	0	3.84	2.95	0.53	0.25	0.05	0	5.16	155	46.9	90.9	330	30	40.3	12.1	253	9.9	10.9
Y326	51	1	male	Hepatobiliary pancreatic surgery	2021-04-2209:40:22	0	1	0	0	1	Hepatic space occupying lesions	None	In the right lobe of the liver, there is a huge lump like slightly low-density shadow with unclear boundary, the size is about 137 × 87 × 108mm (length diameter × width diameter × height diameter). Its internal density is uneven, and multiple patchy lower density shadows can be seen. The lesions in the arterial phase of enhanced scanning are not uniformly enhanced, and the periphery is significan…	None	1	1	0	137	2	63	68.8	39.9	None	19	4.1	5.24	71.2	18.7	5.9	3.4	0.8	0	3.73	0.98	0.31	0.18	0.04	0	6.44	132	43.4	67.4	304	20.5	37.1	17.2	238	10.7	13.2
Y327	31	0	male	Hepatobiliary pancreatic surgery	2021-04-2609:36:40	1	1	0	0	0	1. hepatic S4 space occupying lesions: hamartoma? Cavernous hemangioma? 2. fatty liver 3. liver S7 liver cyst 4. after bilateral tonsillectomy	None	None	The surface of liver is smooth and the proportion of each lobe is uniform; The signal of liver parenchyma was uneven, and the signal difference between in phase and out phase sequence was obvious (compared with in phase sequence, the signal of liver parenchyma in out phase sequence was decreased), the distribution of blood vessels in liver was uniform and natural, and there was no stenosis or fil…	2	0	1	50	2	30	68.8	40.9	None	11.2	1.8	5.27	41.4	48	6.8	3	0.8	0	2.18	2.53	0.36	0.16	0.04	0	4.93	144	44.7	90.7	322	29.2	41.1	12.4	302	9.4	9.9
Y328	47	0	female	Hepatobiliary pancreatic surgery	2021-04-2809:45:27	0	0	0	0	1	1. liver space occupying lesions: malignant tumors? 2. gallbladder adenomyosis 3. hyperlipidemia 4. hepatitis B infection	The shape of the liver section is normal, the volume is not significantly reduced, the surface of the liver envelope is wavy, the front end of the liver margin is blunt, the echo in the liver is thickened and enhanced, and the distribution is uneven. Multiple hyperechoic nodules can be seen in the liver, which are larger and located under the diaphragm of the right posterior lobe, about 10 × 8mm …	The ratio of hepatic lobes was abnormal, the liver fissure was widened, the surface was slightly wavy, the density of parenchyma was uneven, multiple small and slightly low-density foci were diffusely distributed in the liver, especially in the right lobe, multiple nodular enhancement shadows were seen in the artery after enhancement, portal vein and delayed phase were partially lower than normal…	None	4	0	1	10	1	28	72.1	38.5	None	8.3	1.6	5.47	52.6	24.9	14.3	7.7	0.5	0	2.88	1.36	0.78	0.42	0.03	0	4.8	142	44.6	92.9	318	29.6	45.3	13.2	209	10.7	12.9
Y331	47	1	male	Minimally invasive interventional Department	2021-05-0609:48:17	0	0	0	0	0	Hepatic hemangioma (multiple)	None	The liver edge is smooth, the proportion of liver lobes is coordinated, and the liver fissure is not wide. Multiple round like low-density lesions were seen in the liver, and the boundary of plain scan was not clear. Spot like and nodular enhancement were seen at the edge of the lesion in the arterial phase of enhanced scan. The larger one was located in the left lobe of the liver, with a cross-s…	None	4	0	0	118	2	32	72.2	43.7	None	9.3	1.8	4.34	52.3	36.2	7.8	3	0.7	0	2.27	1.57	0.34	0.13	0.03	0	5.26	161	48.7	92.6	331	30.6	42.7	12.5	245	10	11
Y332	76	0	female	Endoscopic hepatobiliary surgery	2021-05-0700:00:00	0	0	0	1	0	1. liver space occupying lesions: cholangiocarcinoma; 2. splenic infarction; 3. renal cyst	The shape and size of the liver section are basically normal, the echo distribution in the liver is uneven, several parenchymal masses can be seen in the liver, about 62 × 46mm, located in the right lobe, the shape is irregular, the internal is hypoechoic, the distribution is uneven, the edge is not clear, the rear echo is weakened, there is sound halo around, and the blood vessels in the liver a…	None	The left lobe of liver and gallbladder were not shown. Clumped and nodular abnormal signal shadows can be seen in the right lobe of the liver, especially in the liver S6, which is about 55mm × 73mm × 45mm in size, showing low T1WI and high t2spair signals. DWI and ADC show obvious diffusion limitation, and their internal signals are uneven. In the center, a patchy T1WI lower and t2spair higher si…	4	0	0	62	2	57	68.7	36.5	None	21	6.2	5.59	71.4	17.9	8.9	1.4	0.4	0	3.99	1	0.5	0.08	0.02	0	3.23	108	33	102.2	327	33.4	54.7	14.5	54	12.9	17.1
Y340	78	1	male	Hepatobiliary pancreatic surgery	2021-05-2509:58:14	1	0	0	0	0	1. Liver cyst 2. After varicose vein operation of left lower extremity 3. Cause of edema of left lower extremity	None	The liver edge is smooth, the proportion of liver lobes is coordinated, the liver fissure is not wide, multiple cystic low-density shadows of different sizes can be seen in the liver parenchyma, the edge is clear, the larger one is located in the liver S6, the size is about 75 × 47mm, the CT value is about 0hu, there is no dilatation of the intrahepatic and extrahepatic bile ducts, and there is n…	None	4	0	1	75	2	12	70.1	41.5	None	18.4	5.4	7.99	57.7	31.4	6.6	3.4	0.9	0	4.61	2.51	0.53	0.27	0.07	0	4.66	136	42.2	90.6	322	29.2	43	13.2	208	10.7	12
Y341	40	0	female	Hepatobiliary pancreatic surgery	2021-05-2510:13:20	0	0	0	0	0	1. Multiple space occupying lesions of the liver: FNH; 2. After thyroidectomy	The shape and size of the liver section are normal, and the echo in the liver is uneven. Two parenchymal mass echoes can be seen in the right lobe of the liver, which are 10 × 7mm and 12 × 11mm in size (under the capsule), and the shape is quasi circular. The interior is hyperechoic, with uneven distribution, clear boundary, regular edge, no change in the posterior echo, and no displacement of th…	None	The surface of liver is smooth and the proportion of each lobe is uniform; A shallow lobulated abnormal signal focus was seen in the S6 / 7 junction of the liver, which was slightly hypointense on T1WI, slightly hyperintense on T2 lipid pressure, and hyperintense on DWI. The corresponding ADC map was not significantly reduced; The size of the lesion was about 38mm × 48mm, and the boundary was not…	4	0	0	48	2	11	68.7	41.4	None	17.9	3.6	4.74	50.9	40.9	4.6	3	0.6	0	2.41	1.94	0.22	0.14	0.03	0	3.83	75	26.2	68.4	286	19.6	45.6	18.9	346	11.1	13
Y343	64	1	male	Hepatobiliary pancreatic surgery	2021-05-2609:30:21	1	1	0	0	1	1. chronic viral hepatitis C 2. liver space occupying cause: primary liver cancer? Others? 3. hypertension 4. after cholecystectomy	A hypoechoic mass can be seen at the lower edge of the right lobe of the liver, about 37 × 35mm in size, quasi circular, with clear boundary, uneven internal echo, and slightly enhanced posterior echo. Several anechoic areas can be seen in the liver, the larger one is about 16 × 12mm (left lobe of the liver), which is quasi circular, with clear boundary, and the rear echo is slightly enhanced.	None	None	4	0	1	37	2	122	79.4	35.4	104	8.6	2.2	5.91	35.9	33.7	9.6	19.1	1.7	0	2.12	1.99	0.57	1.13	0.1	0	4.21	138	43.1	102.4	320	32.8	49.1	12.9	127	14.4	22.9
Y344	41	1	male	Minimally invasive interventional Department	2021-05-2910:34:53	1	0	0	0	1	1. hepatic hemangioma; 2. follow up of HBV carrier status	None	The size and morphology of liver lobes were normal, and the edges were smooth. There were many small, patchy, quasi circular low-density foci in the liver with unclear boundaries. The right lobe of the liver was more and larger, and the larger one was 18 × 26mm. The larger lesion in the arterial phase showed nodular enhancement at the edge of the lesion, and the enhancement shadow in the portal v…	None	4	0	0	26	1	35	64.4	39.5	None	19.7	3.9	4.87	42.7	48.3	6.8	1.8	0.4	0	2.08	2.35	0.33	0.09	0.02	0	4.58	139	42.6	93	326	30.3	42.6	12.3	173	9.9	10.7
Y346	55	1	male	Hepatobiliary pancreatic surgery	2021-06-0110:22:17	0	0	0	0	0	Giant cyst of liver	None	The size and morphology of the liver were normal. Multiple round like low-density shadows were seen in the liver. No enhancement was seen on enhanced scan. The larger ones were about 142 × 122 × 137mm in size	None	4	0	1	142	2	29	64.4	41.9	None	12.4	2	6.71	65.5	24.3	7.5	2.1	0.6	0	4.4	1.63	0.5	0.14	0.04	0	5.32	158	48.9	91.9	323	29.7	42.6	12.6	227	10.9	13.6
Y347	55	0	female	Hepatobiliary pancreatic surgery	2021-06-0209:59:34	0	1	0	0	1	1. Right hepatic space occupying lesions: hepatic Ca?; 2. Liver cirrhosis; 3. Chronic viral hepatitis B	None	None	None	4	0	1	62.0	2	26	69	39.7	None	16.5	3.2	2.27	57.4	33	6.6	2.6	0.4	0	1.3	0.75	0.15	0.06	0.01	0	4.29	126	40	93.2	315	29.4	47.3	13.7	56	11.4	13.3
Y379	59	1	male	Hepatobiliary pancreatic surgery	2021-06-0210:13:00	0	0	1	0	1	1. liver space occupying lesions: liver cancer? 2. chronic viral hepatitis B (follow-up)	The morphology of the liver section is basically normal, the surface of the liver envelope is smooth, and the echo distribution in the liver is uneven. A substantial mass can be seen in the right posterior lobe of the liver, about 79 × 77mm in size, oval in shape, with different intensities of echo inside, uneven distribution, clear edges, and the blood vessels in the liver are pushed and displac…	The ratio of liver lobes was imbalanced, the volume of left lobe was slightly increased, the surface was slightly wavy, the right lobe of liver saw a huge irregular mass of low density shadow, the size was about 96 × 90 × 76mm, the boundary was unclear, its internal density was uneven, the center density was lower, the edge of the lesion in arterial phase after enhancement saw uneven enhancement,…	None	1	1	0	79	2	28	68.8	35.3	None	14.6	4	6.9	48.7	38.1	10.1	2.2	0.9	0	3.36	2.63	0.7	0.15	0.06	0	4.64	138	42.2	90.9	327	29.7	44.9	13.4	260	9	9.2
Y348	33	0	female	Hepatobiliary pancreatic surgery	2021-06-0509:59:47	0	0	0	0	1	1. liver space occupying lesions: liver cancer? 2. chronic viral hepatitis B (follow-up)	The shape and size of the liver section were normal, the surface of the liver capsule was smooth, and the echo distribution in the liver was uneven. At the junction of the left and right lobes of the liver, a solid mass can be seen next to the gallbladder, about 20 × 14mm in size, regular in shape, clear in boundary, hypoechoic inside, and the gallbladder wall is pushed and displaced. Cdfi: the b…	The liver edge is smooth, the proportion of liver lobes is coordinated, the liver fissure is not wide, and the density of intrahepatic parenchyma is not uniform. A kind of round space occupying lesion can be seen under the S4 capsule of the liver, with exophytic growth, clear boundary, low density on plain scan, CT value of about 36hu, mild enhancement on enhanced scan in arterial phase, CT value…	None	1	1	1	20	1	16	73.6	39	None	12.5	2.3	7.75	53.5	33.3	8.8	3.9	0.5	0	4.15	2.58	0.68	0.3	0.04	0	4.42	131	40.3	91.2	325	29.6	39	11.6	244	9.8	10.6
Y350	31	0	female	Minimally invasive interventional Department	2021-06-0809:41:51	0	0	0	0	0	Hepatic hemangioma	The shape and size of the liver section are normal, the echo in the liver is uneven, and several solid masses echo can be seen in the liver, the larger two are about 53 × 30mm (right posterior lobe of the liver) and 56 × 48mm (left lobe of the liver), the shape is quasi circular, the interior is hyperechoic, the distribution is uneven, the boundary is clear, the edge is regular, the echo in the r…	None	The surface of the liver is smooth, and the proportion of each lobe is uniform. Circular and oval long T1 and long T2 signal shadows can be seen in S1, 6 and 7 of the liver, and the sizes are about 59 × 40 × 80mm (S1), 22 × 41 × 31mm (S6) and 8 × 7 × 7mm (S7), respectively. The boundary is clear. After enhancement, the S1 lesion is uneven and significantly enhanced, the inner segment of the liver…	3	0	1	56	2	21	65.1	39	None	15.9	2.9	4.69	53.5	35.2	8.1	3	0.2	0	2.51	1.65	0.38	0.14	0.01	0	4.29	123	38.8	90.4	317	28.7	43.3	13.2	230	11.2	13.2
Y351	68	1	male	Hepatobiliary pancreatic surgery	2021-06-0910:13:45	0	0	0	1	1	1. the nature of liver space occupying remains to be investigated: FNH? HCC? 2. mild fatty liver 3. chronic gastritis 4. prostatic hyperplasia 5. tongue cancer after surgery	None	The proportion of liver lobes was imbalanced, the volume of left lobe was increased, and the liver edge was not smooth. A slightly low-density nodule can be seen in liver S6, with a maximum section of about 26 × 25 × 26mm. Its internal density is uniform, and the CT value is about 60hu (65hu in the liver parenchyma on the same plane). After enhancement, the enhancement in arterial phase is signif…	None	1	1	0	26	1	37	71	40.3	0	14.1	2.4	8.4	61.5	28.9	7.3	1.2	1.1	0	5.17	2.43	0.61	0.1	0.09	0	5.05	144	44.9	88.9	321	28.5	42.6	13.2	238	11.5	15.5
Y360	23	0	female	Hepatobiliary pancreatic surgery	2021-06-2710:05:28	0	0	0	0	0	1. cause of liver space occupying: adenoma? 2.1. chronic gastritis with bile reflux 3. splenomegaly	The shape and size of the liver section are normal, the echo of the capsule is regular, the echo of the liver parenchyma is punctate medium echo, and the distribution is uniform. A slightly hypoechoic mass, about 70 × 72 × 52mm in size, is located in the left-right junction of the liver, which is oval, the boundary is not clear, and the internal echo is not uniform; The middle hepatic vein was co…	The shape and size of the liver are normal. A huge lumpy slightly low-density lesion with a size of about 55mm × 67mm × 62mm (anteroposterior diameter × transverse diameter × high diameter) can be seen in the s4/8 segment of the liver. The boundary is not clear, and the internal density is uniform. The plain CT value is about 55hu. The lesion in the arterial phase of enhanced scan shows obvious u…	None	1	1	0	72	2	14	72.4	41.3	None	10.2	2	3.73	38.7	52.5	6.7	1.3	0.8	0	1.44	1.96	0.25	0.05	0.03	0	4.05	121	36.1	89.1	335	29.9	38	11.7	195	11.3	13.2
Y363	63	1	male	Intratumoral (normal)	2021-07-0610:24:54	1	0	0	0	0	1. liver space occupying lesions: cholangiocarcinoma? 2. after cholecystectomy	The morphology of the liver section was abnormal, and the echo distribution in the liver was uneven. Parenchymal masses can be seen in the right lobe of the liver, with a range of about 107 × 73mm (located in the right lobe of the liver involving the first hepatic hilum), irregular shape, hypoechoic interior, unclear boundary, and the right hepatic vein, right portal branch, and main portal vein …	The liver volume was increased, the intrahepatic bile duct was significantly dilated, and a large low-density area was seen in the right lobe of the liver on plain scan, with a fuzzy boundary, ranging from about 92 × 72 × 76mm (section × upper and lower diameter). The CT value of plain scan was about 32hu, and the adjacent liver envelope was shrunken and concave. On enhanced scan, the edge of art…	None	1	1	0	107	2	20	68.6	32.3	None	15.2	5	7.93	66.4	20.9	10.2	2.1	0.4	0	5.26	1.66	0.81	0.17	0.03	0	3.87	109	34	87.9	321	28.2	40.9	12.6	329	8.7	8.4
Y364	37	0	female	Minimally invasive interventional Department	2021-07-0610:30:29	0	0	0	0	0	Hepatic hemangioma	The shape and size of the liver section are normal, the echo of the capsule is regular, and several local patchy unevenness are seen in the liver parenchyma, showing high and low mixed echo, with a large range of about 86 × 73mm, located in the right lobe of the liver, the boundary is unclear, and the internal echo is uneven	The liver edge is smooth, the proportion of liver lobes is coordinated, the liver fissure is not wide, there are multiple slightly low-density masses in the liver, the larger ones are about 100 × 52mm, the CT value is about 45hu, there is no dilatation of the intrahepatic and extrahepatic bile ducts, and there is no obvious enlarged lymph node shadow in the hilar region.	None	4	0	0	100	2	13	73	40.4	None	23.8	3.9	5.67	35.7	51.9	8.8	3.2	0.4	0	2.03	2.94	0.5	0.18	0.02	0	4.71	141	42.9	91.1	329	29.9	43.8	13.2	220	10.8	12.4
Y365	27	0	female	Hepatobiliary pancreatic surgery	2021-07-0610:53:30	0	0	0	0	1	1. cystic space occupying lesions in abdominal cavity 2. chronic hepatitis B	None	The shape and size of the liver are normal, and the surface is smooth. A quasi circular low-density focus with a diameter of about 3.3mm can be seen in S8 of the liver, and the boundary is clear. No enhancement is seen on enhanced scan. No obvious abnormal density shadow or abnormal enhancement was found in the remaining liver parenchyma	None	1	1	1	3	1	14	71.2	42.4	None	15.5	3.4	6.65	50.1	38.3	7.4	3.3	0.9	0	3.33	2.55	0.49	0.22	0.06	0	4.14	126	38.7	93.5	326	30.4	41.1	11.9	215	10	11.5
Y367	54	1	male	Hepatobiliary pancreatic surgery	2021-07-0710:10:18	1	0	0	0	0	1. huge hepatic cyst 2. mild fatty liver	The morphology of the liver section is abnormal, the left liver is not clearly displayed, and the echo distribution in the liver is uneven. Multiple anechoic areas can be seen in the liver, varying in size. The larger one is about 171 × 155 × 127mm, located in the left liver area, reaching the xiphoid process on the upper side and the umbilicus on the lower side, reaching the midclavicular line o…	The liver edge is smooth, the proportion of liver lobes is coordinated, the liver fissure is not wide, and multiple round cystic low-density shadows of different sizes are found in the liver. The larger one is located in the left lobe of the liver, with a size of about 157 × 130mm, and the adjacent intestinal tube and gastric antrum are compressed and changed; No abnormal density foci were found …	None	4	0	1	171	2	8	64.7	36.4	19	8.4	1.6	4.64	51.3	34.1	9.7	4.3	0.6	0	2.38	1.58	0.45	0.2	0.03	0	4.27	110	37	86.7	297	25.8	40.1	12.6	135	11.6	13.6
Y368	28	0	female	Hepatobiliary pancreatic surgery	2021-07-0810:02:34	0	0	0	0	0	1. Space occupying lesions in the right lobe of the liver: hepatic hemangioma 2, double kidney stones 3, bilateral lung texture thickening	The shape and size of the liver section are normal, the echo of the capsule is regular, the echo of the liver parenchyma is punctate medium echo, evenly distributed, a high echo mass can be seen in the right lobe of the liver, about 69 × 47mm in size, oval, with clear boundary, uneven internal echo, strong echo light mass can be seen in it, with sound shadow in the rear.	A huge soft tissue mass was seen in the right lobe of the liver, with a CT value of 50hu and a range of about 97 × 65 × 79mm	None	1	1	1	97	2	7	67.3	38.1	None	5.6	1	6.09	53.6	39.1	4.4	2.6	0.3	0	3.26	2.38	0.27	0.16	0.02	0	4.04	121	36.6	90.6	331	30	42	12.7	210	10.9	13.2
Y369	33	0	female	Hepatobiliary pancreatic surgery	2021-07-0810:13:02	0	0	0	0	0	1. liver space occupying: hepatic hemangioma?; 2. right renal cyst	The shape of liver section was normal, the volume was not large, and the echo distribution in liver was uneven. Two hyperechoic areas can be seen in the liver, about 42 × 40mm in size (M1 liver S3 segment) and 34 × 32mm in size (liver S5 segment, M2), with regular shape, clear boundary, and hyperechoic rings around	None	None	2	0	1	42	2	9	66.3	37.3	None	7.7	1.5	4.91	57	31	5.7	5.5	0.8	0	2.8	1.52	0.28	0.27	0.04	0	4.19	135	41.2	98.3	328	32.2	44	12	212	11	12.7
Y370	32	0	female	Hepatobiliary pancreatic surgery	2021-07-0810:27:55	0	0	0	0	0	1. Focal nodular hyperplasia of liver 2. Liver cyst	None	The liver edge is smooth, the proportion of liver lobes is coordinated, the liver fissure is not wide, a kind of oval space occupying lesion can be seen in the right posterior lobe of the liver, the edge is clear, the size is about 61 × 40 × 42mm (section × height diameter), the plain scan shows equal density, the CT value is 61hu, the density is uniform, the enhanced scan shows obvious enhanceme…	None	4	0	1	61	2	15	70.9	41.5	None	9.4	1.9	7.85	57.9	34.4	5.9	0.9	0.9	0	4.55	2.7	0.46	0.07	0.07	0	5.41	153	46.1	85.2	332	28.3	36.6	11.9	421	8.8	8.9
Y373	76	0	female	Minimally invasive interventional Department	2021-07-1109:32:06	0	0	0	1	0	1. The nature of intrahepatic space occupying remains to be investigated: hepatic angiosarcoma? 2. Pulmonary nodules; 3. Hypertension; 4. Diabetes mellitus; 5. Causes of upper gastrointestinal bleeding: multiple gastric polyps; Chronic non atrophic gastritis with erosion.	The shape of the liver section is normal, the volume is not large, the echo distribution in the liver is uneven, the first half is slightly denser and enhanced, and the second half is slightly sparse and attenuated. M1: a huge heterogeneous echo mass with a size of 146 × 115 × 95mm can be seen in the right lobe of the liver (mainly in s7/8 segments), with irregular shape, clear boundary, uneven i…	None	None	3	0	1	146	2	23	70.2	39.2	None	14.2	3.7	7.66	81.2	10.6	6.5	1.3	0.4	0	6.22	0.81	0.5	0.1	0.03	0	2.79	78	25.6	91.8	305	28	49.4	14.6	124	10.9	12.5
Y374	56	1	male	Hepatobiliary pancreatic surgery	2021-07-1210:50:01	0	0	0	0	0	1. liver space occupying lesions: giant hemangioma of the liver?; 2. hypertension; 3. after operation of right kidney and ureteral calculi	None	Each lobe of the liver is normal in size and morphology, with smooth edges. Multiple quasi circular slightly low-density shadows are seen in the liver. Nodular enhancement can be seen at the edge of the lesion in the enhanced arterial phase, and the enhanced shadows in the portal venous phase and delayed phase spread to the center. The larger lesion is located in the right lobe of the liver, with…	None	4	0	1	113	2	12	66.9	40.6	None	13.6	3.3	4.05	58.4	32.8	7.4	1.2	0.2	0	2.36	1.33	0.3	0.05	0.01	0	4.69	141	41.2	87.8	342	30.1	38.6	12.1	195	11.6	14.1
Y376	57	0	female	Hepatobiliary pancreatic surgery	2021-07-1609:46:28	0	0	0	0	0	1. liver space occupying lesions: HCC? 2. hepatic hemangioma 3. calcification of aorta and bilateral common iliac arteries	None	A mass was seen at the edge of the S3 segment of the left lobe of the liver, extending outside the liver, with a size of about 57mm × 60mm, and a clear boundary. The enhancement scan showed uneven and obvious enhancement in the arterial phase, cystic necrosis was seen inside, and the enhancement gradually withdrew in the portal phase and delayed phase; The left inner lobe of the liver, the right …	None	3	0	1	60	2	26	71.3	43.7	None	8.8	1.2	5.4	54.2	37.8	6.1	1.5	0.4	0	2.93	2.04	0.33	0.08	0.02	0	4.13	129	39.5	95.6	327	31.2	42.5	12.2	239	8.8	8.7
Y377	35	0	female	Hepatobiliary pancreatic surgery	2021-07-1712:50:55	0	0	1	0	0	1. Giant hemangioma of liver 2, angiomyolipoma of right kidney 3, chronic nephritis 4, severe anemia 5, after cesarean section	None	Each lobe of the liver is normal in size and morphology, with smooth edges. A class of oval slightly low-density foci can be seen across the liver S2 to S3. The boundary is clear, and the size is about 44 × 65 × 37mm. Its internal density is not uniform, and the CT value is about 33hu. Obvious nodular enhancement can be seen around the lesion in the arterial phase, and gradually infill in the por…	None	2	0	1	65	2	18	75	41.4	None	3.1	0.9	4.93	44.7	43.4	8.5	3	0.4	0.2	2.2	2.14	0.42	0.15	0.02	0.01	4.06	95	32.3	79.6	294	23.4	57.8	19.8	385	9.7	10.8
Y378	61	1	male	Hepatobiliary pancreatic surgery	2021-07-2010:11:20	0	1	1	0	0	1. space occupying lesions in the right lobe of the liver: hepatocellular carcinoma 2. small cysts in the left lobe of the liver 3. hypertension 4. chronic gastritis 5. bilateral lung texture thickening 6. mild cirrhosis 7. ascending aorta and aortic valve sclerosis	None	The shape and size of the liver were acceptable, the surface envelope showed fine wavy changes, a kind of circular slightly low-density shadow was seen in the s7/8 junction of the liver, the boundary of plain scan was unclear, the CT value was about 53hu, the arterial phase of enhanced scan was significantly enhanced, the CT value was about 105hu, the portal phase and delayed phase were relativel…	None	1	1	0	38	2	47	66.9	40.5	None	9.5	1.4	8.34	64.6	29.3	5.2	0.5	0.4	0	5.4	2.44	0.43	0.04	0.03	0	4.58	131	38.7	84.5	339	28.6	36.8	12.2	159	10.4	11.9
Y382	69	1	male	Hepatobiliary pancreatic surgery	2021-07-2913:56:24	0	0	0	0	0	1. cystic space occupying lesions in the liver: liver cysts 2. bilateral lung lesions 3. bilateral kidney stones 4. hypertension	None	The liver edge is smooth, the proportion of liver lobes is harmonious, the liver fissure is not wide, the right lobe of the liver is a huge round like water density shadow, the size is about 110 × 88 × 112mm (section × upper and lower diameter), the boundary is clear, and the right kidney is slightly compressed. In addition, there were multiple small round water like density shadows in the liver,…	None	1	1	1	112	2	10	80.1	44.2	None	18.8	4	7.83	82.3	11.1	5.4	0.8	0.4	0	6.45	0.87	0.42	0.06	0.03	0	4.47	149	43.9	98.2	339	33.3	44.5	12.3	195	10.5	12.1
Y383	54	1	male	Hepatobiliary pancreatic surgery	2021-08-0110:05:55	0	0	1	1	0	1. liver cyst; 2. diabetes mellitus; 3 after tonsillectomy	None	The liver was enlarged, and multiple round like low-density shadows of different sizes were seen in the liver, with clear boundaries. Most of the lesions varied in diameter from 8 to 58mm, and the largest one was about 126 × 127 × 122mm (anteroposterior diameter × transverse diameter × upper and lower diameter). The CT value was about 1hu. The intrahepatic bile duct in the right lobe of the liver…	None	4	0	1	127	2	93	76.8	44.8	None	34.2	8.6	7.02	54.3	36.5	5.7	2.8	0.7	0	3.81	2.56	0.4	0.2	0.05	0	5.57	169	51.4	92.3	329	30.3	44.4	13.1	273	10.9	13.5
Y384	68	1	male	Hepatobiliary pancreatic surgery	2021-08-0110:11:42	0	0	0	0	0	1. multiple hepatic cysts; 2. multiple cysts in both kidneys; 3. hypertension	None	The size and morphology of each lobe of the liver are normal, and the edge is smooth. The slightly low-density focus of the original liver S8 is not clearly displayed on plain scan, and the speckled high-density shadow of the present liver S8 is seen, which is new than before. Multiple round like low-density shadows were seen in the liver, with clear edges, increasing and increasing compared with…	None	4	0	1	71	2	19	65.4	39	None	11.6	2.1	5.38	68.6	15.4	10.2	5.4	0.4	0	3.69	0.83	0.55	0.29	0.02	0	4.71	151	45.9	97.5	329	32.1	43.6	11.9	161	11.5	15
Y387	67	1	male	Hepatobiliary pancreatic surgery	2021-08-0913:33:30	0	1	0	0	1	1. liver space occupying: primary liver cancer 2. fatty liver (mild)	None	The density of the liver decreased unevenly on scan, and the CT value was about 38hu. Irregular low-density shadows were seen in the right lobe of the liver, with blurred boundaries. The CT value of spleen was about 54hu.	The surface of liver is smooth and the proportion of each lobe is even. The anti phase liver parenchymal signal was slightly reduced. A huge space occupying lesion with a size of about 52 × 80 × 79mm can be seen in the right lobe of the liver, showing low T1WI, high t2spair, strip like short T2 signal, high signal on DWI, clear boundary, obvious abnormal enhancement of the lesion can be seen in t…	1	1	0	80	2	52	71.3	42.1	None	16.6	3.3	5.33	51.7	33.2	12.2	2.3	0.6	0	2.76	1.77	0.65	0.12	0.03	0	4.45	145	42.7	96	340	32.6	43.3	12.2	143	11.8	16.2
Y389	67	1	male	Hepatobiliary pancreatic surgery	2021-08-1510:06:50	1	0	0	0	1	1. hepatic space occupying lesions: hepatic Ca? 2. gallbladder adenomyosis 3. gallstone 4. right kidney stone	The shape of the liver section was abnormal, the volume was not significantly reduced, the surface of the liver capsule was not smooth, and the echo in the liver was thickened and enhanced, with uneven distribution. An inhomogeneous echo mass can be seen in the liver, located in S7 of the liver, with a size of about 51 × 37mm, irregular shape, uneven internal echo distribution and clear boundary.…	The liver edge is slightly wavy, a kind of circular slightly low-density shadow can be seen next to the inferior vena cava of hepatic S7 capsule, the boundary is not clear, the size is about 52 × 41 × 35mm, the plain CT value is about 38hu, the early lesions of the artery after enhancement show obvious patchy enhancement, the CT value is about 116hu, the density of the lesions in venous phase is …	The liver morphology was irregular, and the liver margin was uneven; A kind of circular abnormal signal shadow can be seen next to the inferior vena cava of hepatic S7 capsule, with a size of about 48 × 41 × 45mm, showing equal T1 slightly long T2 signal shadow, high signal on DWI, low signal on corresponding ADC, obvious abnormal enhancement of lesions can be seen in the early stage of dynamic e…	4	0	0	51	2	29	73.9	43.2	None	18.4	2.9	4.84	61.4	29.1	6.4	2.5	0.6	0	2.97	1.41	0.31	0.12	0.03	0	4.8	155	46.3	96.5	335	32.3	43.5	12.2	190	10.4	11.6
Y390	34	0	female	Hepatobiliary pancreatic surgery	2021-08-1609:17:27	0	0	0	0	0	1. the etiology of liver space occupying disease remains to be investigated: liver cancer? Hepatic hemangioma? Liver cyst?; 2. after cesarean section	None	The surface of the liver was smooth, and the proportion of each lobe was uniform. A low-density lesion with clear boundary was seen in S4, and the size was about 50mm × 42mm × 43mm. The peripheral nodular enhancement of the lesion in the arterial phase and the enhancement range in the portal phase were slightly increased; On contrast-enhanced scan, relatively low contrast-enhanced patchy shadows …	None	1	1	1	50	2	15	66.1	37	None	9.5	1.6	6.72	53.9	30.5	9.4	5.8	0.4	0	3.62	2.05	0.63	0.39	0.03	0	3.96	121	35.4	89.4	342	30.6	40	12.2	202	10.1	10.8
Y391	69	1	male	Hepatobiliary pancreatic surgery	2021-08-1809:28:44	0	0	0	0	0	Intrahepatic multiple cysts	The morphology of the liver section was normal, and the echo distribution in the liver was uneven. Multiple anechoic areas were seen in the liver, about 38 × 28mm in diameter, oval in shape, with clear boundaries, thin walls, and enhanced echo in the rear; Another anechoic area with a size of about 131 × 93mm can be seen in the right lobe of the liver. The internal sound transmission is poor, and…	The liver edge is smooth, the proportion of liver lobes is coordinated, the liver fissure is not wide, and multiple circular low-density shadows of different sizes can be seen in both left and right liver lobes, the larger one is located in the right liver lobe, with a size of about 112 × 92 × 114mm (anterior posterior diameter × transverse diameter × upper and lower diameter), CT value of about …	None	4	0	1	114	2	9	60	37.1	None	13.7	2.6	4.74	46	38.2	10.1	4.6	1.1	0	2.18	1.81	0.48	0.22	0.05	0	3.94	119	35.9	91.1	331	30.2	40.7	12.2	167	10.7	11.4
Y392	44	1	male	Hepatobiliary pancreatic surgery	2021-08-1910:42:39	0	0	0	0	0	Space occupying lesions in the left lateral lobe of the liver: hepatic Ca?	None	Each lobe of the liver is normal in size and morphology, with smooth edges. A class of oval slightly low-density foci can be seen in the left outer lobe, with clear boundaries, and its internal density is not uniform. The CT value is about 22-47hu, and the size is about 6.8 × 5.9 × 5.4cm. Obvious nodular enhancement can be seen at the edge of the lesion in the enhanced arterial phase, the contras…	None	1	1	1	68	2	21	73.5	44.6	None	9	2	6.53	68.5	24.2	4.7	2	0.6	0	4.47	1.58	0.31	0.13	0.04	0	4.89	141	44.3	90.6	318	28.8	40.1	12.2	321	10.5	11.7
Y394	59	1	male	Hepatobiliary pancreatic surgery	2021-08-2110:22:36	0	1	1	0	1	1) Primary liver cancer with portal vein invasion (BCLC stage C) 2) decompensated chronic hepatitis B cirrhosis	The shape of the liver section is still regular, the surface of the liver capsule is not smooth, the echo in the liver is slightly thickened and enhanced, and the distribution is uneven. A substantial mass can be seen in the right lobe of the liver, the size is about 105 × 89 × 90mm, the shape is oval, the internal isoechogenic heterogeneous echo is mainly, the edge is not clear, the echo in the …	The proportion of liver lobes was imbalanced, the liver volume was increased, the surface was slightly wavy, the right lobe of the liver saw huge irregular clumps of slightly low density shadow, the internal density was uneven, the central area saw patchy lower density shadow, the CT value was about 23-47hu, the lesion range was about 110 × 129 × 149mm, the boundary was unclear, the edge of the l…	None	4	0	0	105	2	29	65.4	39.7	None	21.9	6.3	8.96	81.1	9.8	5.2	3.5	0.4	0	7.26	0.88	0.47	0.31	0.04	0	3.47	111	34.2	98.6	325	32	50.1	13.7	171	9.6	9.5
Y395	58	1	male	Hepatobiliary pancreatic surgery	2021-08-2309:44:19	1	0	0	0	1	Hepatic space occupying lesions	The shape of the liver section is normal, and the echo in the liver is uneven. An isoechoic mass can be seen in the S7 segment of the liver, with a size of about 42 × 39mm, and a quasi circular shape. The internal echo distribution is not uniform, the edge is clear, there is a sound halo around, and the rear echo is unchanged. Several hyperechoic masses are also seen in the right lobe of the live…	None	None	4	0	1	42	2	22	69.8	42.2	None	15.7	3.5	4.88	41.6	44.1	10.7	2	1.6	0	2.03	2.15	0.52	0.1	0.08	0	4.13	121	36.4	88.1	332	29.3	39.5	12.2	243	10.4	11.2
Y396	44	0	female	Hepatobiliary pancreatic surgery	2021-08-2409:46:52	0	0	0	0	0	Multiple space occupying lesions in the liver, hemangioma?	None	None	The size and morphology of each lobe of the liver are normal, the edge is smooth, the right lobe of the liver can see the quasi circular slightly low-density shadow, which grows across S8, 7, 5, and 6, the boundary is clear, and the range is about 95 × 77 × 77mm (section × upper and lower diameter). In the enhanced arterial phase, the edge of the lesion is nodular enhancement, the enhanced shadow…	4	0	1	95	2	8	70.1	40.1	None	10.8	1.9	5.83	64.6	28.1	5.1	1.5	0.7	0	3.76	1.64	0.3	0.09	0.04	0	4.48	130	39.3	87.7	331	29	40.2	12.6	303	10.1	10.5
Y397	41	0	female	Hepatobiliary pancreatic surgery	2021-08-2909:37:34	0	0	0	0	0	1. cavernous hemangioma of the liver 2. after radical thyroidectomy	None	The density of liver parenchyma decreased unevenly, with CT value of about 42hu (spleen 55hu), and the enhancement of parenchyma on enhanced scan was not uniform. The left lobe of the liver was enlarged, and a slightly low-density mass was seen in S2 segment, with unclear boundary and irregular shape. The size was about 43mm × 74mm × 80mm (anteroposterior diameter × transverse diameter × upper an…	None	4	0	0	80	2	21	61.9	38.7	None	15	2.6	4.47	45.5	41.8	10.1	2.2	0.4	0	2.03	1.87	0.45	0.1	0.02	0	4.26	124	37.2	87.3	333	29.1	37.1	11.8	176	10.6	12.2
Y398	73	1	male	Hepatobiliary pancreatic surgery	2021-08-2909:45:24	1	1	0	1	0	1. Right liver space occupying: primary liver cancer? Metastatic cancer? 2. Schistosomiasis cirrhosis 3, moderate to severe fatty liver 4, old cerebral infarction 5, hypertension 6, type 2 diabetes 7, prostatic hyperplasia 8, multiple cysts in both kidneys 9, atypical hyperplasia of the larynx 10 after laser surgery, right kidney stone removal	The shape of the liver section is normal, the volume is not large, the echo distribution in the liver is uneven, the first half is slightly thickened and enhanced, the second half is slightly sparse and attenuated, several parenchymal masses can be seen in the right lobe of the liver, some are fused, the larger one is about 29 × 25mm in size, the shape is irregular, the interior is hypoechoic, th…	The liver edge is smooth, the proportion of liver lobes is uncoordinated, the liver fissure is widened, the density of liver parenchyma is diffusely reduced, and the vascular running shadow can be seen, the CT value is about 20-24hu. Multiple patchy, nodular slightly high-density shadows can be seen in the right lobe of the liver, some of which are fused, the larger ones are about 28 × 25mm in si…	None	4	0	0	29	1	33	64.9	37.9	None	10.2	1.9	6.17	71.3	21.1	5.7	1.6	0.3	0.2	4.4	1.3	0.35	0.1	0.02	0.01	4	118	36	90	328	29.5	42.6	13.1	148	10.7	12.2
Y400	19	0	male	Hepatobiliary pancreatic surgery	2021-09-0209:47:00	0	1	1	0	0	Causes of liver space occupying lesions: liver adenoma?	The shape of the liver section is slightly full, the surface of the liver envelope is smooth, the front end of the liver edge is blunt, the echo density in the liver is enhanced, the distribution is uneven, the latter half is slightly sparse and attenuated, the structure of the intrahepatic duct is not clear, and the extrahepatic surface still exists. Multiple hyperechoic areas can be seen diffus…	None	None	4	0	0	94	2	29	80.2	50.7	23	17.2	3.6	6.97	57	35	6.9	0.4	0.7	0	3.97	2.44	0.48	0.03	0.05	0	5.92	172	50	84.5	344	29.1	35.9	11.9	390	9.9	10.4
Y402	53	1	male	Hepatobiliary pancreatic surgery	2021-09-0210:05:38	0	0	0	0	1	1. space occupying lesions in the left lateral lobe of the liver: hepatocellular carcinoma? 2. gallstone 3. chronic hepatitis B 4. left adrenal nodule 5. multiple cysts in both kidneys 6. left kidney stone 7. right lower lobe basal segment nodule	The shape and size of the liver section are normal, the echo of the envelope is regular, the echo of the liver parenchyma is unevenly thickened, a slightly hyperechoic nodule, about 25 × 22mm in size, is visible in the left outer lobe of the liver, the boundary is not clear, the edge is still regular, CDFI: no obvious blood flow signal is seen inside.	The morphology and size of the liver were normal, the surface was not smooth, the proportion of liver lobes was normal, the liver fissure was not widened, the liver S3 showed a slightly low dense patch, the range was about 39 × 29mm, the boundary was fuzzy, the CT value was about 43hu, the enhanced arterial phase showed obvious uneven enhancement, the CT value was about 119hu, the enhancement deg…	None	1	1	0	25	1	40	74.2	41.4	None	9.1	1.8	6.45	58	31.5	6.8	3.1	0.6	0	3.74	2.03	0.44	0.2	0.04	0	5.38	166	50.7	94.2	327	30.9	45	13	209	11.9	15.5
Y404	54	0	female	Hepatobiliary pancreatic surgery	2021-09-0609:40:00	0	0	0	0	0	1. space occupying disease of the right lobe of the liver: liver cyst? Hepatic hemangioma? 2. left renal hamartoma	None	The size and morphology of each lobe of the liver are normal, and the edge is smooth. A mass of slightly low-density foci in the right lobe of the liver are seen, lobulated, and the boundary is still clear. Its internal density is not uniform. The CT value is about 48hu, and the size is about 5.9 × 4.9cm. Obvious nodular enhancement is seen at the edge of the lesion in the enhanced arterial phase…	The liver surface is smooth, the proportion of each lobe is uniform, and the signal of liver parenchyma is uniform. A mass of blocky long T1 long T2 signal shadow can be seen in the right lobe of the liver, with clear edges, the size is about 67 × 44 × 50mm (section × height diameter), the internal signal is not uniform, and there is no obvious diffusion limitation on DWI. A cystic long T1 long T…	2	0	1	59	2	9	63.4	39.2	None	12.3	2.1	4.54	51.5	41.2	5.7	0.9	0.7	0	2.34	1.87	0.26	0.04	0.03	0	4.55	141	43.3	95.2	326	31	43.7	12.5	204	10	10.7
Y405	56	0	female	Hepatobiliary pancreatic surgery	2021-09-0609:55:48	1	0	0	0	0	1. Liver cyst 2, hypertension grade II	The shape of the liver section is normal, and the echo distribution in the liver is uneven. Several anechoic areas can be seen in the liver, the larger ones are about 141 × 128mm (right lobe), the shape is oval, the interior is anechoic area, the sound transmission is acceptable, the interior is separated, the boundary is clear, the wall is thin, and the rear echo is enhanced. The duct structure …	The liver edge is smooth, the proportion of liver lobes is coordinated, the liver fissure is not wide, and multiple circular low-density shadows of different sizes can be seen in the liver. The largest one is located in the right lobe of the liver, with a size of about 150 × 105 × 120mm (anteroposterior diameter × transverse diameter × upper and lower diameter). The CT value is about 5-8hu, and t…	None	4	0	1	150	2	14	64.9	38.9	None	7.4	1.5	4.36	55	31.4	9.9	2.3	1.4	0	2.4	1.37	0.43	0.1	0.06	0	3.94	132	39.2	99.5	337	33.5	41.9	11.4	146	12.5	18.2
Y406	30	0	male	Hepatobiliary pancreatic surgery	2021-09-0610:32:43	1	0	1	0	0	Hepatic space occupying lesions	The shape and size of the liver section are normal, the echo in the liver is uneven, the first half is thickened and enhanced, and the second half is sparse and attenuated. The intrahepatic pipeline structure is not clear, and the extrahepatic surface still exists. An isoechoic mass, about 57 × 50mm in size and oval in shape, can be seen in S4 of the liver. The internal echo is uneven, the bounda…	None	None	1	1	0	57	2	60	71	44.9	None	10	1.8	6.55	48.5	34.7	9.2	7	0.6	0	3.18	2.27	0.6	0.46	0.04	0	4.73	147	43.2	91.3	340	31.1	39.3	11.8	295	10	11.4
Y407	41	1	male	Hepatobiliary pancreatic surgery	2021-09-0810:32:43	0	0	1	0	1	1. hepatic space occupying lesions: hepatic Ca?; 2. chronic viral hepatitis B; 3. small cysts in both kidneys	The shape of the liver section is normal, the volume is not large, the echo distribution in the liver is uneven, the first half is slightly thickened and enhanced, the second half is slightly sparse and attenuated, the intrahepatic pipeline structure is not clear, and the extrahepatic surface still exists. A solid mixed echo mass with a size of 55x52mm can be seen in S1 segment, which is quasi ci…	None	None	1	1	1	55	2	23	66.5	41.5	None	11.2	2.2	7.77	55.8	32.9	7.7	3.2	0.4	0	4.33	2.56	0.6	0.25	0.03	0	4.82	142	42.6	88.4	333	29.5	41.1	12.9	244	11.2	13.4
Y408	57	0	female	Minimally invasive interventional Department	2021-09-0909:45:50	0	0	0	0	0	1. liver cyst, 2. kidney cyst; 3. hypertension; 4. aneurysm of ophthalmic segment of left internal carotid artery	None	The liver edge is smooth, the proportion of liver lobes is harmonious, the liver fissure is not wide, the caudate lobe of the liver can see a round like slightly low-density shadow, local protruding outside the liver contour, the boundary is not clear, the size is about 72mm × 47mm × 82mm (maximum section × height diameter), the CT value is about 53hu, the enhancement scan shows no enhancement, a…	None	4	0	0	82	2	11	65.8	39.9	None	6.8	1.4	3.28	45.8	36.9	12.8	3	1.5	0	1.5	1.21	0.42	0.1	0.05	0	3.86	115	36.8	95.3	313	29.8	42.8	12.3	276	9.1	9.2
Y411	81	1	male	Hepatobiliary pancreatic surgery	2021-09-1310:14:46	1	0	1	1	1	1. Liver space occupying lesions: hepatic Ca?; 2. Left renal cyst; 3. Chronic viral hepatitis B	The shape and size of the liver section are normal, and the echo in the liver is uneven. A hypoechoic mass with a size of about 40 × 34mm can be seen in the liver S4, which is quasi circular, the boundary is still clear, and the internal echo is uneven.	None	The liver edge is smooth, the proportion of liver lobes is acceptable, the liver fissure is not wide, the quasi circular abnormal signal focus can be seen in the S4 of the liver, the boundary is clear, the size is about 22 × 26mm, showing mixed isometric T1 and long T2 signals, DWI shows high signal, ADC image shows low signal, the enhancement scan focus is significantly enhanced, the edge enhanc…	2	0	1	40	2	13	61.8	36.7	None	8.3	1.7	6.6	65.7	18.8	9.2	5.5	0.8	0	4.34	1.24	0.61	0.36	0.05	0	4.33	133	39.2	90.5	339	30.7	43.4	13.2	167	11.1	13.7
Y414	44	1	male	Hepatobiliary pancreatic surgery	2021-09-1511:05:00	0	0	0	0	1	1. liver space occupying lesion 2. duodenal descending diverticulum 3. chronic viral hepatitis B 4. left adrenal gland space occupying lesion 5. left kidney stone	None	The liver volume was slightly reduced, the liver fissure was widened, the edge was clear, the first-class low-density shadow was seen in the liver S4, the boundary was unclear, the size was about 35*31*27mm, the CT value was about 32hu, the early arterial lesions showed patchy mild enhancement after enhancement, the CT value was about 55hu, the density of the lesions in the venous phase was sligh…	None	4	0	0	35	2	23	72.9	44.6	None	14.5	2.8	8.08	56.2	34.3	7.2	1.9	0.4	0	4.55	2.77	0.58	0.15	0.03	0	5.57	158	47.7	85.6	331	28.4	38.4	12.3	275	9.8	10.8
Y417	23	0	male	Hepatobiliary pancreatic surgery	2021-09-2609:52:00	0	0	0	0	0	Liver space occupying lesions: FNH?	None	Each lobe of the liver has normal size and morphology, smooth edges, a kind of oval slightly high-density shadow can be seen in S4, the boundary is still clear, its internal density is uniform, the CT value is about 61hu, the size is about 46 × 34m, protrudes to the lower part of the liver, the lesions in the enhanced arterial phase can see obvious uniform enhancement, the CT value is about 114hu…	None	1	1	1	46	2	34	67	44.4	None	9.6	1.5	6.49	57	33.3	8.3	1.2	0.2	0	3.7	2.16	0.54	0.08	0.01	0	5.18	153	46.4	89.6	330	29.5	41.9	12.8	229	10.6	13.5
Y418	45	1	male	Minimally invasive interventional Department	2021-09-2810:12:32	0	0	0	0	0	Hepatic hemangioma	The shape and size of the liver section are normal, the echo in the liver is uneven, and multiple slightly hyperechoic nodules can be seen in the liver, which is about 46 × 51mm (s2/3), the shape is irregular, the internal echo is uneven, the boundary is clear, the edge is regular, the rear echo is unchanged, and the blood vessels in the liver are not displaced.	Several oval like slightly low-density shadows can be seen in the left and right lobes of the liver, with clear boundaries. The larger ones are 61 × 53 × 33mm in size, and the CT value is about 45hu. A short strip-shaped high-density shadow can be seen under the capsule of the right lobe of the liver.	The surface of liver is smooth and the proportion of each lobe is uniform; Several round like abnormal signal shadows can be seen in the left lobe of the liver and S8 of the liver, with a total of 4, showing low T1WI, high t2-spair and high DWI signals. The internal signal is uniform and the boundary is clear. The lesions in the left outer lobe of the liver are large, about 70mm*54mm*38mm in size…	4	0	1	70	2	28	61.3	38.8	None	12.1	2.2	4.98	57.3	31.3	7.6	3.6	0.2	0	2.85	1.56	0.38	0.18	0.01	0	4.84	139	43.1	89	323	28.7	38.4	11.9	197	8.8	8.7
Y422	47	1	male	Hepatobiliary pancreatic surgery	2021-10-0809:58:00	0	0	0	0	1	1. liver space occupying lesions: hepatocellular carcinoma? 2. chronic viral hepatitis B 3. chronic non atrophic gastritis with antral erosion 4. bilateral renal cysts	The shape and size of the liver section are normal, the echo of the liver parenchyma is slightly thickened and unevenly distributed, and a hypoechoic mass can be seen next to the gallbladder in the S5 segment of the liver, about 20 × 14mm in size, oval in shape, with uniform internal echo, clear boundary, regular edge, no change in the rear echo, and no displacement of the blood vessels in the li…	The liver edge is smooth, the proportion of liver lobes is coordinated, the liver fissure is not wide, oval like slightly low-density shadow can be seen in the liver S5, which is locally protruding outside the liver contour, with a size of about 20 × 13 × 16mm, and a CT value of about 49hu. The enhancement scan in the arterial phase is significantly enhanced, with a CT value of about 137hu, the e…	None	1	1	1	20	1	43	71.3	41.2	None	12.9	2.2	8.26	51.5	36.6	8.4	2.9	0.6	0	4.26	3.02	0.69	0.24	0.05	0	5	152	45.6	91.2	333	30.4	41.8	12.6	172	11.9	15.4
Y423	48	0	female	Minimally invasive interventional Department	2021-10-1309:54:53	0	0	0	0	0	Hepatic hemangioma	None	Each lobe of the liver is normal in size and morphology, with smooth edges. A class of oval slightly low-density foci can be seen in the left outer lobe of the liver, with clear boundaries and uniform internal density. The CT value is about 47hu, and the size is about 93 × 61 × 64mm (section × height diameter)	None	1	1	1	93	2	25	65.8	39.1	None	8.9	1.7	5.32	56.4	33.8	6.2	2.8	0.8	0	3	1.8	0.33	0.15	0.04	0	4.08	126	38.2	93.6	330	30.9	45.1	13.2	225	11.9	15.3
Y424	72	1	male	Hepatobiliary pancreatic surgery	2021-10-2609:34:07	0	0	0	0	0	1. multiple liver cysts 2. post cerebral infarction 3. hypertension 4. double kidney cysts	None	The size and morphology of the liver are normal, and the edge is not smooth. Multiple circular water like density shadows of different sizes can be seen in the left and right liver lobes, the larger one is about 54 × 60mm, the smaller one is about 2.5mm. A class of circular low-density shadows can be seen in the right liver lobe, the CT value is about 30HU, the density is uniform, and the diamete…	None	4	0	None	60	2	21	72.6	40.5	None	14.7	3	6.19	60.5	32.1	6.3	0.8	0.3	0	3.74	1.99	0.39	0.05	0.02	0	4.54	139	43.4	95.6	320	30.6	46.5	13	260	8.7	9
Y425	67	1	male	Hepatobiliary pancreatic surgery	2021-10-2710:15:27	0	0	0	1	1	1. liver space occupying lesions 2. cholecystolithiasis with cholecystitis 3. Type 2 diabetes 4. hypertension grade 3 very high-risk group 5. after cerebral infarction 6. right kidney stone 7. left kidney cyst 8. prostatic hyperplasia 9. chronic viral hepatitis B (review)	The shape of the liver section is normal, the volume is not large, the echo in the liver is slightly thickened, and the distribution is uneven. A substantial mass can be seen in the S5 of the right lobe of the liver, about 40 × 28mm in size, regular in shape, isoechoic inside, clear in boundary, and the blood vessels in the liver run naturally. Cdfi: streaky blood flow signals can be seen in and …	The liver volume is reduced, the edge is not smooth, the liver fissure is widened, a kind of oval low-density shadow can be seen under the liver S5 envelope, the boundary is not clear, the size is about 27 × 38mm, and the CT value is about 54hu. After enhancement, the lesions in the arterial phase show patchy enhancement, and the CT value is about 103-120hu. The lesions in the portal phase and de…	None	1	1	0	40	2	32	72	37.5	None	9.9	2.1	6.88	57.7	21.8	14.4	5.1	1	0	3.97	1.5	0.99	0.35	0.07	0	4.87	139	43.7	89.7	318	28.5	44.9	13.5	323	8.6	8.5
Y428	60	1	male	Hepatobiliary pancreatic surgery	2021-10-3009:59:05	0	0	0	0	0	1. Liver cysts 2, prostatic hyperplasia 3, mild fatty liver 4, hemorrhoids after surgery 5, lumbar disc after surgery	The shape of the liver section is normal, the volume is not large, the echo distribution in the liver is uneven, the first half is slightly denser and enhanced, and the second half is slightly sparse and attenuated. An anechoic area (located in s4-s5-s8) can be seen in the liver, which is about 93 × 89mm in size, quasi circular, with a clear boundary and thin wall,	The liver surface is smooth, the proportion of liver lobes is coordinated, the liver fissure is not wide, and two quasi circular low-density shadows can be seen in the right lobe of the liver, the larger one is about 96 × 84mm in size, and the CT value is about 7hu; No abnormal density foci were found in the remaining liver	None	2	0	1	96	2	14	68.6	38	None	11.4	1.5	8.08	67	22.4	8.2	2	0.4	0	5.42	1.81	0.66	0.16	0.03	0	4.6	135	41.6	90.4	325	29.3	45.4	13.7	301	10.1	10.3
Y430	84	0	female	Hepatobiliary pancreatic surgery	2021-11-0209:54:40	0	0	0	0	0	1. Liver cysts 2, unstable angina pectoris of coronary atherosclerotic heart disease 3, hypertension (grade 3 very high risk) 4, history of old cerebral infarction	None	The liver edge is smooth, the proportion of liver lobes is harmonious, the liver fissure is not wide, a huge cystic low-density shadow can be seen in the left inner lobe and the right anterior lobe of the liver, the boundary is clear, the density is uniform, the CT value is about 4hu, no enhancement is seen in all phases of the enhanced scan, the adjacent liver blood vessels are pushed and displa…	None	4	0	1	140	2	10	68.9	34.9	None	9	1.2	3.62	64.9	27.3	5	2.2	0.6	0	2.35	0.99	0.18	0.08	0.02	0	3.87	110	36.5	94.3	301	28.4	48.7	14.1	166	12.1	14.6
Y431	45	0	female	Hepatobiliary pancreatic surgery	2021-11-0609:50:00	0	0	0	0	0	1. multiple hemangiomas in the liver 2. after left breast cancer surgery 3. after ectopic pregnancy surgery 4. after cesarean section	None	The density of liver parenchyma decreased unevenly, and the volume of left lobe of liver was smaller. A class of circular low-density foci can be seen in S4 and S8 of the liver, with unclear boundaries, and the larger ones are about 60*43mm. Nodular enhancement can be seen at the edge of the lesion in the arterial phase, and the enhancement shadow in the portal venous phase and delayed phase spre…	None	2	0	0	60	2	18	63.3	36.4	None	7.2	1.4	3.92	58.9	31.4	9.2	0.5	0	0	2.31	1.23	0.36	0.02	0	0	3.86	116	36.2	93.8	320	30.1	46.6	13.6	266	10.2	11.4
Y432	57	1	male	Hepatobiliary pancreatic surgery	2021-11-0800:00:00	0	0	0	0	0	1. multiple liver cysts 2. aortic and coronary atherosclerosis 3. mild thickening of bilateral pleura	The shape and size of the liver section are normal, the echo of the envelope is regular, the echo of the liver parenchyma is punctate medium echo, evenly distributed, and multiple anechoic nodules can be seen in the liver, the larger ones are about 132 × 111mm, quasi circular, with clear boundaries, the echo in the rear is enhanced, and the capsule wall can see hyperechoic spots. CDFI: no obvious…	The surface of the liver is not smooth, and multiple oval like low-density shadows can be seen in the liver. The larger one is located in S8, with a size of about 131mm × 92mm × 100mm, and the boundary is clear. Calcification can be seen in part of the cyst wall. No clear enhancement is found in the lesions on enhanced scan. In addition, a slightly low-density nodule with a diameter of about 7.3m…	None	4	0	1	131	2	57	64.8	35.2	None	10.5	2.2	3.9	32.6	49.5	13.6	3.8	0.5	0	1.27	1.93	0.53	0.15	0.02	0	4.52	140	42.5	94	329	31	48.1	14	160	10.3	11.4
Y437	82	1	male	Hepatobiliary pancreatic surgery	2021-11-1509:40:22	0	0	0	0	0	1. liver space occupying lesions: liver cysts 2. emphysema	The morphology of the liver section is normal, and the echo distribution in the liver is uneven. Multiple anechoic areas can be seen in the liver, with different sizes. The larger one is about 84 × 69mm (left lobe), with clear boundaries, thin walls, internal separation, and posterior echo enhancement. The intrahepatic duct structure was clearly displayed. CDFI: no obvious blood flow signal in th…	Multiple quasi circular water like density shadows in the liver are attached, the larger one is about 75 × 62mm, and a small quasi circular water like density shadow in the upper part of the left kidney is about 11mm in diameter.	None	4	0	1	84	2	14	60.7	37.3	None	8.4	1.3	5.68	58.1	27.6	8.6	4.6	1.1	0	3.3	1.57	0.49	0.26	0.06	0	4.77	144	45.2	94.8	319	30.2	46.7	13.3	176	10.2	11.5
Y308	93	1	male	Hepatobiliary pancreatic surgery	2021-11-1609:58:21	0	0	0	0	0	1. hepatic space occupying lesions 2. ascites 3. choledocholithiasis	The shape of the liver section is irregular, the echo of the capsule is irregular, the echo of the liver parenchyma is uneven, the echo of the bile duct wall in the liver is enhanced, and multiple hyperechoic spots and hyperechoic vocal cords can be seen, with a large range of about 37 × 5mm. A hypoechoic mass with a range of about 32 × 29mm can be seen in the first hilar region, with unclear bou…	None	The liver surface is not smooth, showing shallow wavy changes, the proportion of each lobe is not coordinated, the bile duct wall is unevenly thickened at the hepatic hilum, the lumen is narrowed, and circular enhancement can be seen on enhanced scan, with unclear boundary. Patchy mixed signals were seen in S7 of the liver with unclear boundaries. The enhancement scan showed uneven enhancement, r…	3	0	0	37	2	42	65.9	34.8	None	32.4	12.3	7.14	79	10.5	8.4	2.1	0	0	5.64	0.75	0.6	0.15	0	0	3.28	111	32.3	98.5	344	33.8	44.5	12.1	157	9.8	10
Y440	66	1	male	Hepatobiliary pancreatic surgery	2021-11-2009:59:47	0	0	0	0	0	1. liver space occupying: liver cancer?	None	The liver edge is smooth, the liver volume is slightly reduced, the density of the parenchyma is not uniform, a kind of circular and equal low-density shadow can be seen under the liver S7 envelope, the boundary is not clear, some protrude beyond the contour, the size is about 27 × 21mm, the CT value is about 45hu, the early lesions of the artery show uneven and obvious enhancement after enhancem…	None	1	1	0	27	1	36	82.8	37.9	None	14.2	4.1	7.12	42.3	43.8	11	2.5	0.4	0	3.01	3.12	0.78	0.18	0.03	0	4.74	147	44.3	93.5	332	31	45.4	13.2	146	11.1	12.6
Y442	53	0	female	Minimally invasive interventional Department	2021-11-2110:09:45	0	0	0	0	0	Hepatic cyst	The morphology of the liver section is abnormal, and the echo distribution in the liver is uneven. Multiple anechoic areas can be seen in the liver, varying in size. The larger one is located in the left lobe, about 114 × 77mm in size, and is quasi circular in shape. The interior is an anechoic area, with clear boundaries, thin walls, and posterior echo enhancement. The intrahepatic duct structur…	None	None	4	0	1	114	2	12	68.8	40.1	None	10.6	1.7	4.48	40.7	47.3	7.4	4.2	0.4	0	1.82	2.12	0.33	0.19	0.02	0	4.4	129	42.2	95.9	306	29.3	42.4	12	230	9.8	10.2
Y443	29	0	female	Hepatobiliary pancreatic surgery	2021-11-2209:59:00	0	0	0	0	0	Hepatic space occupying lesions: bile duct cysts	The morphology of the liver section was normal, and the echo distribution in the liver was uneven. An anechoic area was visible in the left inner lobe of the liver, about 88 × 88 × 41mm in size, oval in shape, and about 33 × 11mm in internal visible range. The isoechoic mass, which could be moved by changing the body position, had a clear boundary, thin wall, and enhanced echo in the rear; The in…	None	The surface of liver is smooth, the proportion of each lobe is uniform, and the signal of liver parenchyma is uniform. Wedge shaped abnormal signal shadow can be seen in S4 of liver, with clear boundary and size of about 65 × 54 × 65mm. The internal signal is stratified, with long T1 and long T2 in the upper part and short T1 and short T2 signal in the lower part; There was no enhancement in mult…	1	1	1	88	2	12	65.5	36.6	None	9	1.6	6.48	38.5	46.5	6.8	7.4	0.8	0.2	2.5	3.01	0.44	0.48	0.05	0.01	4.01	119	36.3	90.5	328	29.7	41.3	12.7	275	10.2	11.6
Y447	63	0	female	Hepatobiliary pancreatic surgery	2021-11-2711:40:15	0	0	0	0	0	1. Liver cysts 2. Hypertension	None	None	None	None	0	None	None	None	11	65.8	38.4	None	11.8	1.7	4.76	51.9	39.7	5.7	2.1	0.6	0	2.47	1.89	0.27	0.1	0.03	0	5.17	129	42	81.2	307	25	38	12.9	197	11.2	12.9
Y448	29	0	female	Hepatobiliary pancreatic surgery	2021-11-2711:54:59	0	0	0	0	0	Multiple hemangiomas of the liver	None	The size and morphology of each lobe of the liver are normal, the edges are smooth, multiple quasi circular slightly low-density shadows are seen in the liver parenchyma, and the boundaries are clear. Patchy lower density shadows are seen in the center of larger lesions. The lesions in the hospital in the arterial phase of enhanced scanning show obvious nodular enhancement, and the enhanced shado…	None	4	0	1	73	2	8	64.9	39.7	None	14	3	6.56	63.7	26.1	8.5	1.2	0.5	0	4.18	1.71	0.56	0.08	0.03	0	5.57	112	37.4	67.1	299	20.1	34.4	14.8	249	None	None
Y449	68	1	male	Hepatobiliary pancreatic surgery	2021-11-3010:04:20	0	0	0	0	0	1. huge liver cyst 2. hypertension 3. prostatic hyperplasia 4. after resection of intracranial benign tumor	The size and morphology of the liver were normal, the edges were smooth, and multiple circular low-density shadows of different sizes were seen in the left and right liver lobes, some of which were fused, the larger ones were about 97 × 129 × 123mm in size (anterior posterior diameter × transverse diameter × upper and lower diameter), the CT value was about 4hu, the boundaries were clear, and cal…	None	None	4	0	1	129	2	15	63.5	37.3	None	10.7	2.5	6.61	59.3	24.5	8.6	6.7	0.9	0	3.92	1.62	0.57	0.44	0.06	0	5.86	128	41.9	71.5	305	21.8	37.3	14.9	290	11	13
Y450	27	0	female	Hepatobiliary pancreatic surgery	2021-11-3010:06:04	0	0	0	0	0	Hepatic hemangioma	The shape and size of the liver section are normal, the echo in the liver is uneven, two masses can be seen in s7/8 of the liver, the size is about 73 × 63mm and 14 × 11mm, the larger one is in the shape of a huge block, the internal echo is uneven, the periphery is slightly hyperechoic, the internal part is hypoechoic, the boundary is clear, the edge is regular, the rear echo is unchanged, and t…	None	None	2	0	1	73	2	9	64.5	39.1	None	19.2	4.1	5.32	54.4	33.5	10	1.7	0.4	0	2.9	1.78	0.53	0.09	0.02	0	3.86	113	32.8	85	345	29.3	37	12	156	10.5	12.7
Y451	65	1	male	Hepatobiliary pancreatic surgery	2021-12-0200:00:00	0	1	0	0	1	Hepatic space occupying lesions	The morphology of the liver section is abnormal, the volume of the right lobe of the liver is reduced, the surface of the liver envelope is wavy, the front end of the liver margin is blunt, the echo in the liver is thickened and enhanced, and the distribution is uneven. A hypoechoic mass with a size of about 50 × 44mm can be seen in S8 of the right lobe of the liver, the shape is still regular, t…	The liver volume is reduced, the edge is rough, the proportion of each lobe of the liver is imbalanced, the left lobe is significantly increased, the right lobe is relatively reduced, and the intrahepatic density is not uniform. In the delayed phase, the liver S8 seems to see a quasi circular slightly lower enhancement focus, with unclear boundary, the range is about 44 × 46mm, which is larger th…	The liver volume is reduced, the edge is rough, the proportion of liver lobes is imbalanced, the left lobe is significantly increased, the right lobe is relatively reduced, the signal of liver parenchyma is not uniform, a kind of circular short T1 and slightly short T2 signal shadow can be seen in liver S6 and 8, the boundary is clear, the larger one is located in S8, the size is about 33 × 30mm,…	4	0	0	56	2	59	57	25.8	None	46.7	22.7	3.02	54.2	27.8	12.3	5	0.7	0	1.64	0.84	0.37	0.15	0.02	0	2.72	74	20.9	76.8	354	27.2	75.1	27.3	61	None	None
Y454	64	1	male	Hepatobiliary pancreatic surgery	2021-12-0800:00:00	0	1	0	0	1	1. small space occupying liver cancer is more likely; 2. chronic hepatitis B follow-up liver cirrhosis; 3. hypertension	None	The density in the liver parenchyma is uneven, and multiple patchy high-density shadows are seen in the liver, with unclear boundaries, mainly located at the liver edge. No obvious signs of dilatation were found in the intrahepatic and extrahepatic bile ducts. There are multiple quasi circular low-density shadows in the right lobe of the liver, with clear boundaries. The larger ones are about 23 …	None	4	0	0	23	1	13	74.1	39.3	None	18.8	3.1	5.16	46.7	37.2	8.9	6	1.2	0	2.41	1.92	0.46	0.31	0.06	0	4.89	147	44.1	90.2	333	30.1	42	12.7	145	11.1	13.7
Y458	31	0	female	Hepatobiliary pancreatic surgery	2021-12-1410:41:00	0	0	0	0	0	Intrahepatic bile duct stones	The shape and size of the liver section are normal, the echo of the capsule is regular, the echo of the liver parenchyma is still uniform, the pipeline structure is clearly displayed, the left hepatic duct is dilated, the inner diameter is 5mm, and multiple strong echo masses can be seen inside, about 12 × 6mm, with acoustic shadow in the rear.	The liver edge is smooth, the proportion of liver lobes is coordinated, the liver fissure is not wide, the bile duct in the left outer lobe of the liver is tortuous and dilated, and there is no abnormal density shadow in it, and there is no abnormal enhancement on enhanced scan. Nodular slightly low-density shadow with a size of about 11 × 14mm was seen in the left inner lobe of the liver near th…	None	4	0	0	14	1	84	68.1	40.4	None	14.5	2.7	5.17	61.1	28.4	8.9	1	0.6	0	3.16	1.47	0.46	0.05	0.03	0	3.97	114	35.8	90.2	318	28.7	41.3	12.5	250	10.9	13.2
Y460	44	0	female	Hepatobiliary pancreatic surgery	2021-12-1711:26:30	0	0	0	0	0	1. Hepatic hemangioma 2, hepatic cyst 3, schizophrenia	The morphology of the liver section is normal, and the echo in the liver is uneven. Several heterogeneous echo masses can be seen in the liver, which are large and about 79 × 43mm in size (left lobe), oval, with unclear boundary and uneven internal echo.	The volume of the left lobe of the liver is slightly increased, and a slightly low-density huge space occupying lesion can be seen in the left lobe of the liver, the size is about 80 × 55 × 74mm (section × upper and lower diameter), the boundary is clear, the density is not uniform, the CT value is about 43hu, a small patchy lower density shadow can be seen in the center, the CT value is about 21…	None	4	0	0	80	2	9	67.6	39.7	None	8.7	1.5	2.91	40.2	47.8	7.9	3.4	0.7	0	1.17	1.39	0.23	0.1	0.02	0	4.22	116	36.6	86.7	317	27.5	39.1	12.2	185	9.5	10.1
Y461	61	0	female	Hepatobiliary pancreatic surgery	2021-12-1810:49:51	0	0	0	0	0	1. hepatic hemangioma 2. hypertension 3. bilateral renal cysts	None	Each lobe of the liver is normal in size and morphology, with smooth edges. Three quasi circular low-density foci can be seen in the right lobe of the liver, with unclear boundaries. The larger one is located in the S7 segment of the liver, and the maximum cross-sectional size is about 72*111mm	None	3	0	0	111	2	14	68.4	41.5	None	11.7	2	6.1	46.4	45.4	6.7	1	0.5	0	2.83	2.77	0.41	0.06	0.03	0	4.32	128	36.9	85.4	347	29.6	35.9	11.7	221	8.7	8.5
Y462	56	1	male	Hepatobiliary pancreatic surgery	2021-12-2010:44:16	1	0	0	1	0	1. Liver space occupying lesions 2. Type II diabetes mellitus	None	Multiple nodules of different sizes and patchy slightly low-density shadows were seen in the right lobe of the liver, and some of them showed multi nodule fusion like changes, the larger range was about 65 × 91 × 75mm, the internal density was uneven, the boundary was unclear, and the CT value was 21hu. The lesions showed peripheral uneven enhancement in arterial phase, and progressive mild to mo…	None	4	0	0	91	2	22	68.2	28	None	12.8	3.9	6.54	68.7	18.2	11.5	1.4	0.2	0.2	4.5	1.19	0.75	0.09	0.01	0.01	3.74	102	30.8	82.4	331	27.3	37.5	12.5	277	9.3	9.5
Y464	35	0	female	Hepatobiliary pancreatic surgery	2021-12-2510:21:23	0	0	0	0	1	1. hepatic hemangioma 2. postoperative pulmonary nodules 3. chronic hepatitis B	The shape and size of the liver section are normal, the echo in the liver is uneven, a slightly hyperechoic mass can be seen in the left lobe of the liver, about 73 × 44 × 62mm in size, the shape is quasi circular, the internal echo is uneven, the boundary is not clear, the edge is regular, the rear echo has no change, and the blood vessels in the liver are pushed and displaced	Each lobe of the liver is normal in size and morphology, with smooth edges. A class of oval slightly low-density foci can be seen in the left lobe of the liver, with clear boundaries. The internal density is not uniform, and the size is about 5.7 × 3.6cm	None	1	1	0	73	2	8	60.4	33.9	None	8.1	1.6	5.11	52.2	34.6	10.8	2	0.4	0.2	2.67	1.77	0.55	0.1	0.02	0.01	4.02	119	36.3	90.3	328	29.6	41.1	12.5	167	10.9	12
Y465	32	0	female	Hepatobiliary pancreatic surgery	2021-12-2810:12:04	0	0	0	0	0	1. Hepatic hemangioma 2. Polycystic ovary syndrome	The shape and size of the liver section are normal, the echo in the liver is uneven, a slightly hyperechoic mass can be seen in the right lobe of the liver, about 81 × 67 × 61mm in size, the shape is quasi circular, the internal echo is uneven, the boundary is clear, the edge is regular, the rear echo has no change, and the blood vessels in the liver have no obvious displacement.	None	None	1	1	1	81	2	35	69.4	40.2	None	12.2	2.4	5.47	53.7	37.3	7.9	0.9	0.2	0	2.94	2.04	0.43	0.05	0.01	0	4.7	142	44.3	94.3	321	30.2	42.2	12	261	10	10.9
Y468	30	0	female	Hepatobiliary pancreatic surgery	2022-01-0309:45:41	0	0	0	0	0	Liver space occupying lesions: hepatic hemangioma?	The shape and size of the liver section are normal, and the echo in the liver is uneven. A slightly hyperechoic mass can be seen in the S5 of the liver, about 61 × 32mm in size, oval in shape, with uneven internal echo, clear boundary, regular edge, no change in the rear echo, and no displacement of the blood vessels in the liver. CDFI: no obvious blood flow signal was found around and inside the…	Each lobe of the liver is normal in size and morphology, with smooth edges. A class of oval slightly low-density foci can be seen in the S5 segment of the liver, the boundary is still clear, and its internal density is not uniform. The CT value is about 43hu, and the size is about 62*36*60mm. The lesions in the enhanced arterial phase show obvious nodular uneven enhancement, and the portal venous…	None	1	1	1	62	2	14	65.4	38	None	7.2	1.4	4.54	35.9	54.4	8.1	0.9	0.7	0	1.63	2.47	0.37	0.04	0.03	0	4.33	137	39.6	91.5	346	31.6	40.8	12	265	9.5	9.7
Y469	35	0	female	Hepatobiliary pancreatic surgery	2022-01-0409:55:02	0	0	0	0	0	1. Liver space occupying: hepatic FNH?	The shape and size of the liver section are normal, and the echo in the liver is uneven. A slightly hyperechoic mass with a size of about 96 × 63mm can be seen in the liver (near s8/s4), and the shape is quasi circular. The internal echo is uneven, the boundary is clear, the edge is regular, the rear echo is unchanged, and the blood vessels in the liver are not displaced. CDFI: no obvious blood f…	None	The surface of the liver is smooth, and the proportion of each lobe is uniform. A mass of abnormal signal shadow can be seen in s4/8 of the liver, showing slightly longer T1 and equal T2 signals. The boundary is clear, and the size is about 89mm × 62mm × 66mm. The edge seems to see envelope shadow. DWI shows that the lesion is slightly hyperintense locally, ADC shows equal signal, and the lesion …	3	0	1	96	2	9	68.4	41.5	None	8.5	1.5	6.58	48.5	36.8	7.1	6.8	0.8	0	3.19	2.42	0.47	0.45	0.05	0	4.59	139	41.8	91.1	333	30.3	40.3	12.1	332	9.2	9.6
Y470	39	0	male	Hepatobiliary pancreatic surgery	2022-01-0710:33:07	0	1	0	0	1	1. liver space occupying lesions: primary liver cancer 2. hepatitis B cirrhosis 3. right lung nodules	The shape of the liver section was abnormal, the volume was reduced, the surface of the liver envelope was not smooth, the front end of the liver margin was blunt, and the echo in the liver was thickened and enhanced, and the distribution was uneven. A substantial mass with a size of about 57 × 39mm, regular shape, isoechoic interior, unclear boundary, and displacement of intrahepatic blood vesse…	The volume of the liver was reduced and the surface was wavy.	None	1	1	0	57	2	63	64.8	43.6	None	37.6	13	7.13	70.5	17.1	9.3	2.7	0.4	0	5.03	1.22	0.66	0.19	0.03	0	4.88	147	41.3	84.6	356	30.1	37	12.1	138	11	12.6
Y472	48	1	male	Hepatobiliary pancreatic surgery	2022-01-1410:21:53	0	0	0	0	0	Liver space occupying lesions: HCC? Inflammatory pseudotumor? Intrahepatic cholangiocarcinoma?	None	The liver edge is smooth, the proportion is harmonious, the liver fissure is not wide, the density of the liver parenchyma is unevenly reduced, the CT value is 30-53hu, the liver parenchyma is unevenly enhanced on enhanced scan, the right posterior lobe of the liver can see patchy uneven enhancement area, the arterial phase shows equal, slightly high density, the portal phase can see patchy low-d…	The surface of liver is smooth and the proportion of each lobe is uniform; The signal of liver parenchyma is uneven, and the signal difference between in phase and out phase sequence is obvious (compared with in phase, the signal of liver parenchyma in out phase sequence is significantly reduced), and the signal of fat suppression sequence is reduced. The liver S7 showed patchy isointense T1 slig…	4	0	0	6	1	27	65.2	41.2	None	15.3	2.8	6.41	36.2	44.8	10.5	7.3	1.2	0	2.32	2.87	0.67	0.47	0.08	0	5.07	154	45	88.8	342	30.4	39.8	12.4	266	11.5	14.5
Y476	41	1	male	Hepatobiliary pancreatic surgery	2022-01-1909:53:41	0	0	0	0	0	Space occupying lesions in S2 segment of liver: FNH? Hepatic Ca?	None	None	None	None	2	2	None	None	13	65.7	40.5	None	12.3	2.3	5.03	62.6	26	7.8	2.8	0.8	0.2	3.15	1.31	0.39	0.14	0.04	0.01	4.88	141	42.6	87.3	331	28.9	38.5	12	209	9.5	10.4
Y478	51	1	male	Hepatobiliary pancreatic surgery	2022-02-0810:15:28	1	0	0	0	0	1. Liver space occupying: liver Ca? 2. Hypertension grade 2 low-risk group	The shape and size of the liver section are normal, the echo in the liver is uneven, the first half is slightly denser and enhanced, and the second half is slightly sparse and attenuated. A slightly hypoechoic mass can be seen in the left inner lobe of the liver, which is about 31 × 21mm in size and oval in shape. The internal echo is uneven, the boundary is not clear, the edge is regular, the re…	None	The surface of liver is smooth and the proportion of each lobe is uniform; A class of circular abnormal signal foci were found in S4 of liver, with isohypointense signal on T1WI, slightly hyperintense signal on t2spair, hyperintense signal on DWI, and hypointense signal on ADC; The size of the lesion was about 21 × 18mm, and the boundary was still clear; After dynamic enhancement, most of the les…	1	1	0	31	2	31	62.4	38.9	None	18.8	4.6	8.06	53.3	35.9	7.6	3	0.2	0	4.3	2.89	0.61	0.24	0.02	0	5.12	153	46.9	91.6	326	29.9	44.4	13	257	9.8	10.9
Y485	28	0	male	Hepatobiliary pancreatic surgery	2022-02-2810:03:32	1	0	0	0	0	1. Liver space occupying lesions: hepatic hemangioma?	The shape and size of the liver section are normal, and the echo in the liver is uneven. A solid mixed echo mass with a size of about 81 × 56mm can be seen in the right posterior lobe of the liver. The shape is quasi circular, the internal echo is uneven, the boundary is not clear, the edge is regular, the rear echo is unchanged, and the blood vessels in the liver are pushed and displaced. CDFI: …	The size and morphology of each lobe of the liver are normal, and the edge is smooth. A large class of round slightly low-density foci can be seen in the right posterior lobe, the boundary is still clear, and its internal density is not uniform. The CT value is about 15-50hu, and the size is about 65 × 88mm, which is similar to that before. The edge of the mass in the enhanced arterial phase is a…	None	1	1	0	81	2	48	66.9	41.5	None	24	4.2	5.61	47.4	40.6	7	4.1	0.9	0	2.66	2.28	0.39	0.23	0.05	0	5.1	140	42.9	84.1	326	27.5	37.2	12.4	246	10.1	11.1
Q054	54	1	male	Hepatobiliary pancreatic surgery	2022-03-0310:10:10	1	0	0	0	1	1. Space occupying lesions in the left lateral lobe of the liver: hepatic Ca? 2. Gallbladder polyps; 3. hypertension	None	None	The liver morphology was irregular, the liver margin was uneven, and the liver fissure was widened; The signal of liver parenchyma is uneven. A class of circular abnormal signal foci can be seen in S2 of liver, with a size of about 37mm × 32mm × 32mm, mainly showing low T1WI and high t2spair. Patches of longer T1 and long T2 signal shadow can be seen in the center. The DWI high b-value image show…	1	1	1	37	2	33	67.3	40.3	None	10.7	2.2	5.67	57.5	32.8	7.6	1.6	0.5	0	3.26	1.86	0.43	0.09	0.03	0	4.9	148	45.4	92.7	326	30.2	42.2	12.3	219	10.6	12.1
Q056	59	1	male	Hepatobiliary pancreatic surgery	2022-03-0811:06:10	0	1	0	0	0	1. Cirrhosis with multiple nodules; 2. Liver space occupying lesions; 3. Hepatitis B	The morphology of the liver section was normal, the volume was not significantly reduced, the surface of the liver envelope was wavy, the front end of the liver margin was blunt, the echo in the liver was thickened and enhanced, and the distribution was uneven. Scattered slightly hypoechoic nodules were seen in the liver, about 12 × 9mm (right anterior lobe S8), and the boundary was unclear.	The ratio of hepatic lobes was abnormal, the volume was reduced, the surface was wavy, and several punctate calcifications were seen in hepatic S4; The density of the liver parenchyma is uneven. A slightly low-density small nodule, about 8 × 5mm, is seen in S7. It is significantly enhanced in the arterial phase, equal to the liver parenchyma in the portal phase, and lower than the liver parenchym…	None	4	0	0	12	1	16	56	29.9	None	23.5	5.2	5.71	55.5	28.5	9.5	5.8	0.7	0	3.17	1.63	0.54	0.33	0.04	0	3.5	118	34.3	98	344	33.7	46.1	12.8	94	10.6	11.9
Q057	62	0	female	Hepatobiliary pancreatic surgery	2022-03-1009:59:29	0	0	0	0	0	1. the nature of the space occupying lesion in the right lobe of the liver remains to be investigated: hepatic hemangioma? Liver cancer? 2. cause of abdominal and back pain 3. after thyroidectomy	The size and morphology of each lobe of the liver are normal, the edge is smooth, a kind of oval slightly low-density focus can be seen in the right lobe of the liver, the boundary is still clear, the density in it is not uniform, the lower density shadow can be seen in the center, the CT value is about 21-43hu, the size is about 71 × 85 × 64mm, the obvious nodular uneven enhancement can be seen …	None	The surface of liver is smooth and the proportion of each lobe is uniform; A kind of oval abnormal signal shadow can be seen in the right lobe of the liver, showing low T1WI, high T2WI, high DWI signal, ADC showing slightly high signal, the internal signal is not uniform, patchy short T1 short T2 signal can be seen inside, the boundary is clear, and the size is about 82mm*81mm*67mm; On contrast-e…	1	1	1	82	2	22	66.6	38.4	None	12	2.2	4.87	53.7	37.8	6	2.1	0.4	0	2.62	1.84	0.29	0.1	0.02	0	5.63	119	40.8	72.5	292	21.1	38.6	14.8	185	10	13.2
Q059	43	1	male	Hepatobiliary pancreatic surgery	2022-03-1509:44:50	1	0	0	0	1	1. The nature of liver space occupying lesions is unknown 2. Gallbladder polyps 3. Right kidney cyst	None	The shape and size of the liver are normal, and the surface is smooth. A slightly low-density shadow can be seen at the junction of s7/8 of the liver, with blurred edges. After enhancement, the liver shows obvious nodular enhancement in the arterial phase, and the degree of enhancement is similar to that of the aorta. The liver shows continuous enhancement in the portal and venous phases, with a …	None	1	1	0	8.5	1	16	68.2	44.3	None	13.8	2.2	5.06	42.3	46.8	8.3	2	0.6	0	2.14	2.37	0.42	0.1	0.03	0	5.03	155	46.2	91.8	335	30.8	41.2	12.2	152	12.3	16.4
Q060	46	1	male	Minimally invasive interventional Department	2022-03-1712:09:20	0	0	0	0	1	1. Intrahepatic cholangiocarcinoma? 2. Hepatitis C 3, gallstone; 4. Lumbar degeneration	None	A patchy low-density shadow was seen in the left lobe of the liver with unclear edges, and the CT value was about 37hu. A nodular high-density shadow with a diameter of about 8mm can be seen in the gallbladder. A small amount of ascites.	None	1	1	0	None	None	40	71.4	44.6	None	21.7	4.2	6.5	69.2	22.2	6.6	1.8	0.2	0	4.5	1.44	0.43	0.12	0.01	0	5.21	159	46.7	89.6	340	30.5	43.2	13.2	171	10.6	13.2
Q063	42	1	male	Hepatobiliary pancreatic surgery	2022-03-3109:52:05	0	0	0	0	0	1. space occupying lesions in s2\s8 segment of liver: FNH? Liver adenoma? 2. small cyst of liver 3. small cyst of left kidney	A tumor in s4a segment of liver, about 50mm in diameter, tough, exophytic, with clear boundary; S2 segment ultrasound can detect a tumor of about 20mm, located in the liver parenchyma	Ct+ enhancement of upper abdomen in Shenzhen Longgang District People's Hospital (March 21, 2022): 1. the S8 and S2 segments of the liver were significantly enhanced. Compared with the 2019-02-21ct film, the S8 lesions of the liver were slightly larger and the S2 lesions of the liver were significantly larger. Considering the possibility of liver adenoma, FNH may not be excluded. 2. small subcaps…	None	2	0	None	50	2	12	69.2	41.5	None	13.2	2.3	5.94	62	29.3	7.2	0.5	1	0	3.68	1.74	0.43	0.03	0.06	0	4.83	142	42.8	88.6	332	29.4	41.1	12.6	238	10	11.6
Q065	58	0	female	Hepatobiliary pancreatic surgery	2022-04-0610:27:08	0	0	0	0	1	Liver space occupying factors	The shape and size of the liver section are normal, and the echo in the liver is uneven. A hyperechoic nodule can be seen at the junction of s4/8 of the liver, about 18 × 11mm in size, oval in shape, with uneven internal echo. Hypoechoic areas can be seen inside, with clear boundaries, no change in the rear echo, and no displacement of the blood vessels in the liver. CDFI: dotted and strip blood …	The surface of liver is smooth and the proportion of each lobe is uniform; A class of oval abnormal signal shadow can be seen in the junction area of S4 and 8 of the liver, which is hypointense on T1WI, annular hyperintense and intermediate hypointense on T2WI, with clear boundary, and the size is about 21 × 15 × 14mm (section × upper and lower diameter). DWI shows a little hyperintense signal at…	None	3	0	1	21	1	8	70.4	40.5	None	13.3	2.6	4.58	42	43.4	9.8	3.9	0.9	0	1.92	1.99	0.45	0.18	0.04	0	4.44	131	39.9	89.9	328	29.5	39.7	12	243	9	8.9
Q066	44	1	male	Minimally invasive interventional Department	2022-04-0611:16:57	0	1	0	0	1	1. Primary liver cancer; 2. Decompensated cirrhosis of chronic hepatitis B;	None	The liver edge is still smooth, the proportion of liver lobes is imbalanced, the left lobe is significantly enlarged, and the right lobe is relatively narrowed. A kind of circular slightly low-density shadow can be seen under the liver S7 capsule, with unclear boundary, about 15 × 14mm in size. The CT value of plain scan is about 48hu, that of enhanced scan is about 56hu in arterial phase, that o…	None	1	1	0	15	1	36	65.1	38.3	None	22.4	4	2.21	57.4	32.6	8.1	1.4	0.5	0	1.27	0.72	0.18	0.03	0.01	0	3.82	112	34.8	91.1	322	29.3	47	14.1	44	13.7	24.1
Q067	46	1	male	Hepatobiliary pancreatic surgery	2022-04-0714:57:55	0	0	0	0	1	1. Cause of fever: liver abscess? 2. Gallstone with cholecystitis 3. Chronic viral hepatitis B	The shape and size of the liver section are normal, the echo of the envelope is regular, the echo of the liver parenchyma is punctate medium echo, evenly distributed, the first-class echo mass can be seen in the right lobe of the liver near the envelope, the size is about 72 × 63mm, the shape is still regular, the boundary is not clear, the internal echo is still uniform, and no obvious liquid pa…	The size and morphology of each lobe of the liver are normal, the edges are smooth, the density heterogeneity of the liver parenchyma is slightly reduced, a kind of circular slightly low-density shadow can be seen in the posterior segment of the right lobe of the liver, the boundary is not clear, the size is about 57mm × 62mm, the internal density is not uniform, the CT value is about 12-32hu, th…	None	1	1	0	62	2	42	66.5	34.7	None	11.8	3.8	8.26	71.5	12.6	15.5	0.2	0.2	0	5.9	1.04	1.28	0.02	0.02	0	4.25	130	39.4	92.7	330	30.6	42.6	12.6	208	10.3	11.8
Q069	80	0	female	Hepatobiliary pancreatic surgery	2022-04-1610:43:34	0	1	0	1	0	1. liver space occupying lesions 2. Type 2 diabetes 3. hyperlipidemia 4. hypertension grade 3 5. coronary atherosclerotic heart disease 6. severe osteoporosis 7. after cholecystectomy 8. after lumbar surgery 9. arterial plaques in both lower limbs 10. bilateral carotid atherosclerotic plaques 11. mild fatty liver	The shape of the liver section is normal, the volume is not large, the echo distribution in the liver is uneven, the front half is slightly thickened and enhanced, the rear half is slightly sparse and attenuated, the left lobe of the liver can be seen with a strong echo spot about 5 × 6mm in size, with weak sound shadow in the rear, the distal intrahepatic bile duct is not dilated, and the extrah…	None	None	1	1	None	6	1	21	64	40.9	None	6.7	1.3	5.44	32.2	43	5.3	18.8	0.7	0	1.75	2.34	0.29	1.02	0.04	0	3.07	104	32.4	105.5	321	33.9	56.7	14.5	148	11.2	12.6
Q073	29	0	female	Hepatobiliary pancreatic surgery	2022-04-1910:21:59	0	0	0	0	0	1. The nature of liver space occupying remains to be examined: hepatic hemangioma? 2. After resection of breast fibroma	The shape and size of the liver section are normal, the echo in the liver is uneven, a slightly hyperechoic mass can be seen in the left outer lobe of the liver, the size is about 71 × 62mm, the shape is oval, the internal echo is uneven, the boundary is clear, the edge is regular, the rear echo is unchanged, and the blood vessels in the liver are not displaced. CDFI: blood vessels can be seen ar…	None	None	1	1	1	71	2	6	62.9	40.6	None	8.9	1.8	5.1	48.3	42	6.9	2.2	0.6	0	2.47	2.14	0.35	0.11	0.03	0	4.63	114	37.3	80.6	306	24.6	-----The	-----The	278	10.4	14.2
Q075	57	1	male	Hepatobiliary pancreatic surgery	2022-04-2010:02:05	0	1	0	0	1	1. liver cancer with multiple intrahepatic metastases 2. hepatitis B cirrhosis portal hypertension splenomegaly thrombocytopenia 3. small cyst in the upper segment of the right posterior lobe of the liver 4. right lung bulla 5. thoracic aorta and aortic atherosclerosis 6. accessory splenic nodule	None	None	The liver morphology was abnormal, the proportion of each lobe was not symmetrical, the liver edge showed wavy changes, the signal of liver parenchyma was uneven, and multiple lumpy and patchy abnormal signal foci of different sizes could be seen, some of which protruded outside the liver contour, and the larger ones were located in S7 segment, with a range of about 42 × 33mm, showing low T1WI, h…	4	0	0	42	2	81	67.4	37.6	None	18.8	5.2	2.39	57.7	29.3	10.5	2.1	0.4	0	1.38	0.7	0.25	0.05	0.01	0	4.38	134	39.1	89.3	343	30.6	43.2	13.1	77	13.5	19.6
Q076	57	1	male	Hepatobiliary pancreatic surgery	2022-04-3011:22:09	1	0	0	1	0	1. Liver space occupying lesions: liver cancer? 2. Hypertension grade 1 low-risk group	None	The proportion of liver lobes was imbalanced. A huge irregular mass of low density shadow was seen in the posterior segment of the right lobe of the liver, about 141 × 129 × 115mm in size, with unclear boundary, uneven density in it and lower density in the center. Uneven enhancement was seen at the edge of the lesion in the arterial phase after enhancement, and multiple arterial branches feeding…	None	4	0	0	141	2	58	68.4	31.3	None	7.6	1.2	8.93	73.2	14.1	9.5	2.5	0.7	0	6.54	1.26	0.85	0.22	0.06	0	3.76	117	35.8	95.2	327	31.1	41.9	12	244	12.2	16.1
Q079	47	1	male	Hepatobiliary pancreatic surgery	2022-05-0610:12:33	1	1	0	0	0	1. liver space occupying: liver Ca? 2. liver cirrhosis 3. multiple gallstones 4. old fracture of the second and third ribs on the right 5. after subtotal gastrectomy	None	The proportion of liver lobes was imbalanced, the left lobe was enlarged, and the liver surface was partially under polished. A mixed low-density nodule shadow can be seen under the capsule of the right posterior lobe of the liver, the boundary is clear, the cross-section is about 67 × 56mm, the CT value is about -20-44hu, the local fat density shadow seems to be seen, the arterial lesion shows o…	None	1	1	1	67	2	43	59.7	37.7	None	10	2.5	5.81	47.8	37	10.7	4	0.5	0	2.78	2.15	0.62	0.23	0.03	0	4.49	147	44.5	99.1	330	32.7	44.5	12.1	256	10.2	11.9
Q080	26	0	female	Hepatobiliary pancreatic surgery	2022-05-0910:12:51	0	0	0	0	0	Liver space occupying: liver adenoma?	None	A kind of circular slightly low-density foci can be seen in the left outer lobe of the liver, with a size of about 55 × 52 × 50, a clear boundary, a CT value of about 45hu, a slightly less uniform density in it, and a strip-shaped fat density area can be seen, with a CT value of about -36 to -2hu. On dynamic contrast-enhanced scanning, the arterial phase is uneven and significantly enhanced, with…	None	1	1	1	55	2	9	71.4	38	None	6.2	1.1	9.76	47.2	40.9	5.7	5.4	0.8	0	4.6	3.99	0.56	0.53	0.08	0	4.37	119	37.9	86.7	314	27.2	39.8	12.6	273	10.9	12.6
Q081	37	0	female	Hepatobiliary pancreatic surgery	2022-05-1010:23:11	0	0	0	0	0	Liver space occupying: liver cancer? Liver adenoma?	The morphology of the liver section is basically normal, the surface of the liver envelope is smooth, and the echo distribution in the liver is uneven. A substantial mass can be seen in s6/7 of the right lobe of the liver, about 45 × 37mm in size, oval in shape, hypoechoic inside, uneven distribution, unclear edge, slightly enhanced echo in the rear, silent halo around, no satellite nodules, and …	None	None	1	1	0	45	2	8	67.2	41.1	None	13.8	2.6	5.41	51.5	29.8	9.1	8.7	0.9	0	2.79	1.61	0.49	0.47	0.05	0	3.72	117	35	94.1	334	31.5	38.5	11.3	192	11.1	13
Q084	55	1	male	Hepatobiliary pancreatic surgery	2022-05-1909:58:03	1	0	0	0	1	1. liver space occupying: liver Ca? 2. chronic hepatitis B	None	The shape and size of the liver are normal, the surface is smooth, the proportion of liver lobes is normal, the liver fissure is not widened, a slightly low-density shadow with a size of about 32mm × 26mm can be seen in the left outer lobe of the liver, the density is not uniform, and the CT value is about 20-40hu. After enhancement, there are obvious enhancement areas of fast forward and fast ba…	None	1	1	None	32	2	33	62.2	39.2	None	13.2	2.4	4.74	40.2	45.8	9.3	3.4	1.3	0	1.91	2.17	0.44	0.16	0.06	0	4.31	147	41.5	96.3	354	34.1	43.8	12.3	153	10.6	12.6
Q085	55	1	male	Hepatobiliary pancreatic surgery	2022-05-2009:45:30	0	1	0	0	1	1. Liver space occupying lesions 2. The nature of cervical, thoracic, abdominal and bilateral inguinal lymph nodes is yet to be determined 3. Chronic hepatitis B 4. Compensated liver cirrhosis 5. Thyroid nodules 6. Emphysema 7. Splenomegaly 8. Chronic atrophic gastritis 9. Mixed hemorrhoids 10. Lumbar disc herniation 11. Chronic hepatitis C (treated)	The shape of the liver section was abnormal, the volume was not significantly reduced, the surface of the liver envelope was not smooth, the front end of the liver margin was slightly blunt, the echo in the liver was thickened and enhanced, and the distribution was uneven. A substantial mass can be seen in S7 of the right lobe of the liver, about 47 × 41mm in size, irregular in shape, mainly hypo…	None	None	1	1	0	47	2	20	73.5	44.5	23	6.8	1.4	6.84	60.1	23.4	11.8	2.9	1.8	0	4.11	1.6	0.81	0.2	0.12	0	6.36	141	46.4	73	304	22.2	41.4	17.2	167	10.6	16.5
Q086	22	0	female	Hepatobiliary pancreatic surgery	2022-05-2110:27:45	0	0	0	0	0	1. liver space occupying: liver adenoma	The shape and size of the liver section are normal, and the echo in the liver is uneven. A low isoechoic mass with a size of about 26 × 22mm can be seen in the left outer lobe of the liver. The shape is quasi circular, and the internal echo is uniform, the boundary is clear, the edge is regular, and the rear echo is unchanged. CDFI: no obvious blood flow signal was found around and inside the int…	None	None	1	1	1	26	1	9	64.3	40.5	None	9.4	2	4.39	46.8	39.6	11.8	1.1	0.7	0	2.05	1.74	0.52	0.05	0.03	0	4.09	126	39.7	97.1	317	30.8	42.2	11.9	225	9.7	10.1
Q087	40	0	female	Hepatobiliary pancreatic surgery	2022-05-2309:57:45	0	0	0	0	0	1. intrahepatic space occupying: liver adenoma? 2. hepatic hemangioma 3. fatty liver 4. subacute thyroiditis 5. multiple nodules in the right lobe of the thyroid gland	None	The liver surface is smooth, the proportion of each lobe is uniform, and a mass of equal - slightly low-density shadow is seen in the left lobe, with a size of about 69 × 65mm. The central irregular low enhancement area can be seen in the arterial phase of the enhanced scan, and the enhancement in the portal and venous phases is similar to that in the normal liver parenchyma, and the central low …	None	3	0	0	69	2	34	76.9	44.8	None	8.6	1.4	10.2	65.3	25.9	6.6	1.3	0.9	0	6.67	2.64	0.67	0.13	0.09	0	4.76	132	42.9	90.1	308	27.7	45.1	13.6	402	9.1	9.5
Q092	66	0	female	Hepatobiliary pancreatic surgery	2022-06-0710:18:02	0	1	0	0	0	1. liver space occupying lesions 2. hemoptysis causes	Multiple hypoechoic masses can be seen in the liver, which are about 18 × 11mm (S4) and 10 × 10mm (S5), and multiple anechoic areas can be seen in the liver, the larger one is about 28 × 22mm (right anterior lobe)	The liver edge was smooth, the proportion of liver lobes was coordinated, the liver fissure was not wide, multiple low-density shadows were seen in the liver parenchyma, and no obvious enhancement was seen on the enhanced scan. The larger one was located in S6, and the size was about 26 × 20mm. On the enhanced scan, small patchy enhancement shadows were seen in S6 of the liver in the arterial pha…	None	4	0	None	26	0	18	76.5	46.9	None	19.2	3.1	6.42	66.6	26	6.5	0.6	0.3	0	4.27	1.67	0.42	0.04	0.02	0	4.79	146	43.7	91.2	334	30.5	41	12.3	277	10.3	12.3
Q093	44	1	male	Hepatobiliary pancreatic surgery	2022-06-1109:32:49	0	0	0	0	0	Liver space occupying lesions: liver abscess?	The morphology of the liver section is normal, and the echo in the liver is uneven. A mixed echo area can be seen in the left inner lobe of the liver, with a range of about 60 × 57mm. The shape is still regular, the boundary is still clear, and the echo is uneven. A sheet-like anechoic area can be seen in the left inner lobe of the liver. Cdfi: punctate blood flow signal can be seen in the periph…	None	None	1	1	1	60	2	16	75.2	33.4	None	9.3	2.2	12.72	75.7	17	6.8	0.2	0.3	0	9.62	2.16	0.87	0.03	0.04	0	4.18	122	38.1	91.1	320	29.2	41.2	12.4	372	8.9	9.1
Q094	32	0	male	Hepatobiliary pancreatic surgery	2022-06-1109:47:35	0	0	0	0	0	1. Space occupying lesions of liver	The shape of the liver section is normal, the volume is not large, the echo distribution in the liver is uneven, the first half is slightly thickened and enhanced, the second half is slightly sparse and attenuated, the intrahepatic pipeline structure is not clear, and the extrahepatic surface still exists. A hypoechoic mass with a size of about 49 × 35 × 32mm can be seen in S2 of the liver. The s…	Each lobe of the liver is normal in size and morphology, with smooth edges. A class of circular slightly low-density foci can be seen in S2 of the liver, the boundary is not clear, and its internal density is uniform. The CT value is about 45hu, and the size is about 28 × 30 × 41mm (section × height diameter). The enhanced arterial phase shows overall obvious enhancement, the portal venous phase …	None	1	1	1	41	2	39	74.2	44.3	None	17.7	3	7.11	47.2	42.3	6.2	3.5	0.8	0	3.35	3.01	0.44	0.25	0.06	0	5.19	157	48.8	94	322	30.3	43.3	12.5	275	9.7	10.4
Q095	67	0	female	Hepatobiliary pancreatic surgery	2022-06-1610:12:44	0	1	0	1	1	1. liver space occupying lesions 2. hypertension grade 3 (very high risk) 3. diabetes 4. hepatitis B	The shape of the liver section is normal, the volume is not significantly reduced, the surface of the liver envelope is not smooth, the front end of the liver margin is blunt, the echo in the liver is thickened and enhanced, and the distribution is uneven. Multiple hyperechoic nodules can be seen in the liver, the larger ones are about 7 × 7mm in size, located in the right anterior lobe S8 of the…	None	The proportion of each lobe of the liver is balanced, the liver fissure is not significantly widened, the surface is not smooth, the signal of liver parenchyma is uneven, a long T1 long T2 signal shadow (T1 sequence 15 / 32), about 10mm × 7mm, can be seen next to the right branch of hepatic S5 portal vein, the lipid signal can be seen in it, the enhancement is obvious in arterial phase, the enhan…	4	0	0	10	1	13	66.6	39.9	None	15	3.3	4.48	58.3	30.6	9.4	1.3	0.4	0	2.61	1.37	0.42	0.06	0.02	0	3.65	120	35.8	98.1	335	32.9	41.8	11.6	163	11.2	13.8
Q096	37	0	female	Hepatobiliary pancreatic surgery	2022-06-2709:55:42	0	0	0	0	0	1. liver space occupying: liver adenoma? Hemangioma?	None	The liver edge is smooth, the proportion of liver lobes is coordinated, the liver fissure is not wide, multiple patchy slightly low-density shadows are seen in the liver parenchyma, the boundary is not clear, the larger one is located in the left outer lobe of the liver, the size is about 42.5mm × 41.5mm × 43mm, the boundary is clear, and the CT value is about 39hu. The enhancement scan shows tha…	The surface of the liver is smooth, and the proportion of each lobe is uniform. Several nodular, lumpy, long T1 and long T2 signal shadows can be seen in the liver, with clear edges. The larger one is located in the liver S3, and the size is about 43 × 32 × 38mm (section × height diameter). The enhancement scan edge is nodular enhancement, and gradually fills inward in the portal venous phase and…	4	0	1	43	2	6	66.5	42.3	None	10.2	2	4.86	58.7	33.5	5.3	2.1	0.4	0	2.85	1.63	0.26	0.1	0.02	0	4.48	130	41.1	91.7	316	29	42.2	12.6	214	11	13.6
Q097	40	0	female	Hepatobiliary pancreatic surgery	2022-07-0510:31:52	0	0	0	0	0	Liver space occupying lesions: FNH? Liver cancer?	None	The liver surface is smooth, the proportion of liver lobes is coordinated, the liver fissure is not wide, and a lumpy slightly low-density shadow can be seen at the junction of left and right lobes, with a size of about 36 × 27mm. The plain scan boundary is not clear, and the CT value is about 54hu. The enhanced scan is significantly enhanced in the arterial phase, with a CT value of about 97hu, …	None	3	0	0	36	1	18	61.5	39.1	None	6.3	1.1	6.88	53.4	36.8	6.8	2.6	0.4	0.1	3.67	2.53	0.47	0.18	0.03	0.01	4.39	124	38.1	86.8	325	28.2	40.9	13	180	11.8	13.5
Q103	64	1	male	Hepatobiliary pancreatic surgery	2022-07-2111:12:12	1	0	0	0	0	1. Space occupying lesions of liver 2. Causes of abdominal pain 3. Hypertension grade 1 intermediate risk	The shape and size of the liver section are normal, and the echo in the liver is uneven. A banded hypoechoic mass can be seen in the s4/8 junction of the liver, with a range of about 34 × 18mm, irregular shape, uneven internal echo, clear boundary, no change in the rear echo, and no displacement of the blood vessels in the liver. CDFI: no obvious blood flow signal was found around and inside the …	None	None	1	1	1	34	2	15	73.6	42.3	None	15.9	2.4	4.63	52.7	36.3	8.2	1.5	1.3	0	2.44	1.68	0.38	0.07	0.06	0	4.62	147	44.5	96.3	330	31.8	43.8	12.3	208	9.9	11.1
Q105	72	0	female	Hepatobiliary pancreatic surgery	2022-07-2210:15:18	0	0	0	0	1	1. Liver space occupying lesions: liver cancer; 2. Hepatitis B; 3. Hypertension; 4. The nature of bilateral thyroid nodules remains to be examined; 5. Chronic bronchitis; 6. After internal fixation of lumbar fracture; 7. After cholecystectomy	None	The surface of the liver is shallow wavy. Nodular slightly long T1 and slightly long T2 signals with a size of about 25mm × 21.5mm can be seen in s7/8 of the liver, and longer T1 and longer T2 signals can be seen in the liver. The uneven nodular enhancement in arterial phase can be seen on the contrast-enhanced scanning of pumecen, and the enhancement degree in portal and venous phase is lower th…	None	1	1	None	25	1	14	64.8	39.7	None	9.6	2	7.11	50.9	36.4	8.9	3.2	0.6	0	3.62	2.59	0.63	0.23	0.04	0	3.92	136	40.4	103.1	337	34.7	45.1	11.9	170	9.9	11.2
Q106	37	0	female	Hepatobiliary pancreatic surgery	2022-07-2511:35:33	0	0	0	0	0	Intrahepatic space occupying: focal nodular hyperplasia of the liver?	None	The surface of the liver is smooth, and the proportion of each lobe is uniform. Under the liver S8 envelope, a patchy slightly long T1 slightly long T2 signal shadow can be seen, the boundary is not clear, DWI shows a slightly high signal, ADC shows a slightly low signal, the larger one is located in the liver S8, the size is about 54 × 33 × 44mm, the enhancement scan shows uneven enhancement, th…	None	4	0	0	54	2	10	73.9	44.1	None	9.4	1.9	4.9	67.2	24.5	6.9	0.8	0.6	0	3.29	1.2	0.34	0.04	0.03	0	4.15	101	32.8	79	308	24.3	44.3	15.5	273	11.3	13
Q107	35	0	female	Hepatobiliary pancreatic surgery	2022-07-2609:58:47	0	0	0	0	0	Left hepatic space occupying lesion and ascites	None	The liver volume was slightly larger, the surface was smooth, the signal of liver parenchyma was not uniform, the enhancement in arterial phase was obviously uneven, and the gllison sheath edema around the portal vein showed a slightly low signal shadow; A kind of round mass shadow can be seen in the space between liver and spleen, mainly with equal T1 and T2 signals, and the boundary is clear, w…	None	1	1	1	70	2	10	73	43.1	None	13.3	3.7	4.8	68.8	22.7	7.7	0.4	0.4	0	3.3	1.09	0.37	0.02	0.02	0	4.23	127	38.5	91	330	30	40.2	11.9	190	10.3	10.8
Q111	29	0	female	Hepatobiliary pancreatic surgery	2022-08-1009:28:00	0	0	0	0	0	1. intrahepatic space occupying: focal nodular progressive hyperplasia (FNH)?; 2. left renal cyst; Mild hydronephrosis in the right kidney.	None	The liver surface is smooth, and the proportion of each lobe is uniform. A class of circular slightly low-density foci can be seen in the S3 of the liver, the boundary is not clear, the size is about 36 × 29m, and the CT value is about 54hu. After dynamic enhancement, most of the lesions are significantly enhanced in the early stage, with a star shaped low-density area in the center without enhan…	None	1	1	0	36	2	8	66.6	40.1	None	14.9	3.1	4.69	37.3	50.5	9.6	1.3	1.3	0.2	1.75	2.37	0.45	0.06	0.06	0.01	4.4	125	38.4	87.3	326	28.4	43.5	13.7	281	9.9	10.4
Q114	56	1	male	Hepatobiliary pancreatic surgery	2022-08-1709:21:00	0	0	0	1	0	1. Liver space occupying, nature unknown type 2, 2-diabetes	The morphology of the liver section is basically normal, the surface of the liver envelope is smooth, and the echo distribution in the liver is uneven. A substantial mass can be seen in the left lobe of the liver, about 25 × 16mm in size, oval in shape, hypoechoic inside, less homogeneous distribution, clear edge, no change in the rear echo, and there is a sound halo around. CDFI: streaky blood f…	The surface of the liver is not smooth, and the proportion of each lobe is uniform. A class of circular abnormal signal foci can be seen at the junction of s2/4 of the liver. T1WI shows low signal, T2WI shows high signal, the size is about 21 × 16 × 17mm, the boundary is clear, the peripheral ring enhancement in arterial phase, the enhancement in portal phase is locally reduced, DWI shows high si…	None	1	1	1	25	1	36	64	40.2	None	7.4	1.5	5.05	46	40.4	6.9	5.9	0.8	0	2.32	2.04	0.35	0.3	0.04	0	5.98	143	45.7	76.4	313	23.9	40.3	14.7	135	-----The	-----The
Q115	58	1	male	Hepatobiliary pancreatic surgery	2022-08-1709:52:00	1	0	0	0	0	Hepatic space occupying lesions	The morphology of the liver section is basically normal, the surface of the liver envelope is smooth, and the echo distribution in the liver is uneven. A substantial mass can be seen in the S3 segment of the liver, about 64 × 43 × 68mm in size, irregular in shape, hypoechoic inside, uneven distribution, clear edge, no change in the rear echo, no sound halo around, and no satellite nodules. No enl…	An abnormal signal focus can be seen in s2-3 of liver. T1WI is isointense, T2WI is mixed, mainly hypointense, with patchy slightly hyperintense shadows. DWI lesions have limited diffusion. The mass in arterial phase of enhanced scan shows significantly uneven enhancement, with hypointense non enhanced separation, and blood supply from the left lobe of liver artery branches; In the portal phase an…	None	1	1	1	68	2	13	62.3	38.7	None	10.7	1.9	5.41	58.9	29.8	8.5	2.4	0.4	0	3.19	1.61	0.46	0.13	0.02	0	4.47	138	42.1	94.2	328	30.9	42.8	12.3	194	10.5	12.5
Q118	54	0	female	Hepatobiliary pancreatic surgery	2022-08-2709:27:00	0	0	0	0	1	1. liver space occupying lesions 2. bronchiectasis 3. Helicobacter pylori infection 4. chronic gastritis	None	Round like soft tissue density mass shadow can be seen in the caudate lobe of the liver and the liver stomach pancreas space. The shape is irregular, and the larger cross-section range is about 83 × 82 × 95mm. The density of plain scan is uneven. The moderately enhanced CT value of enhanced scan is 89hu, and the non enhanced cystic change area can be seen in the lesion. The mass invaded the liver…	None	1	1	None	95	2	12	56.8	31.9	None	20.4	5.6	3.95	63.9	23.5	11.1	1	0.5	0	2.52	0.93	0.44	0.04	0.02	0	4	87	28.1	70.3	310	21.8	37.7	15.5	237	10.5	9.6
Q120	65	1	male	Hepatobiliary pancreatic surgery	2022-08-3010:19:00	1	0	0	0	0	1. Liver cyst 2. Gallstone with chronic cholecystitis	The shape of the liver section is normal, and the echo distribution in the liver is uneven. Multiple anechoic areas can be seen in the right lobe of the liver, with different sizes. The larger one is about 189 × 155 × 148mm, with a quasi circular shape. The interior is an anechoic area, with clear boundaries, thin walls, and enhanced echo in the rear. The intrahepatic duct structure was clearly d…	None	None	4	0	1	189	2	11	62.6	37.2	None	14.1	2.6	5.21	55.8	33.4	7.1	3.3	0.4	0	2.91	1.74	0.37	0.17	0.02	0	4.55	145	43.8	96.3	331	31.9	43.7	12.3	138	10.8	12.5
Q122	58	0	female	Hepatobiliary pancreatic surgery	2022-09-0409:36:00	0	0	0	0	0	1. hepatic space occupying lesions: hepatic Ca?	The shape of the liver section is abnormal, the volume is not significantly reduced, the surface of the liver envelope is smooth, the front end of the liver margin is blunt, a huge parenchymal mass can be seen in the right lobe of the liver, the range is about 91 × 88 × 71mm, the shape is irregular, the interior is slightly hyperechoic, the boundary is unclear, and the blood vessels in the liver …	None	None	1	1	0	91	2	17	70.8	28.8	None	21.4	5.5	8.54	73.9	13.7	9.3	2.7	0.4	0	6.32	1.17	0.79	0.23	0.03	0	2.88	88	29.1	101	302	30.6	46.6	12.6	193	10.4	11.7
Q123	53	1	male	Gastroenterology	2022-09-1210:14:00	1	0	1	0	1	1. chronic viral hepatitis B 2. liver space occupying? 3. multiple gallstones 4. fatty liver 5. pulmonary nodules 6. thyroid nodules	The shape of the liver section is normal, the volume is not significantly reduced, the surface of the liver envelope is not smooth, the front end of the liver margin is blunt, the echo in the liver is thickened and enhanced, and the distribution is uneven, the first half is slightly thickened and enhanced, the second half is slightly sparse and attenuated, the intrahepatic pipeline structure is n…	The size and morphology of the liver are acceptable, the proportion of each lobe is still uniform, the surface is not smooth, the signal of the liver parenchyma is uneven, showing diffuse small dot like, slightly short T1 and slightly short T2 signal, and the reverse phase liver signal is reduced. After dynamic enhancement, no abnormal enhancement foci were found, and the blood vessels in the liv…	None	1	1	1	6	1	43	66.6	36.5	None	21.7	3.6	6.35	51.1	31.3	12.1	4.9	0.6	0	3.24	1.99	0.77	0.31	0.04	0	4.84	145	44.6	92.1	325	30	45.1	13.3	178	12.2	14.6
Q124	67	0	female	Hepatobiliary pancreatic surgery	2022-09-1216:51:00	0	0	0	0	0	1. liver space occupying lesions: hemangioma?	None	The shape and size of the liver are normal, the surface is smooth, the proportion of liver lobes is normal, and the liver fissure is not widened. A huge round mixed low-density mass shadow can be seen in the right lobe of the liver, about 94 × 73 × 78mm in size, which is larger than before, and irregular patches of lower density shadow can be seen inside. The plain CT value is about 18-45hu. Nodu…	None	1	1	None	94	2	12	66.7	39.9	None	15.4	2.6	5.29	64.1	27	7.2	1.1	0.6	0	3.39	1.43	0.38	0.06	0.03	0	4.1	126	38.2	93.2	330	30.7	41.6	12.2	245	10.2	11.4
Q126	69	1	male	Hepatobiliary pancreatic surgery	2022-09-1510:06:00	0	0	0	0	0	Hepatic space occupying lesions	The shape and volume of the liver section were normal, and the echo distribution in the liver was uneven. The hierarchical structure of the first porta hepatis in the right lobe of the liver is disordered, and it seems that an isoechoic mass can be seen, with an approximate range of 62 × 61mm, irregular shape, unclear boundary, narrow main portal vein and common bile duct, and widened distal end.…	None	None	1	1	0	62	2	27	73.2	39.4	None	13.6	3.1	6.39	67.6	19.7	8.6	3.8	0.3	0	4.32	1.26	0.55	0.24	0.02	0	4.08	121	38.4	94.1	315	29.7	45.8	13.3	194	11.4	12.7
None	60	1	male	None	2022-10-0500:00:00	0	0	0	0	0	Hepatic space occupying lesions	The morphology of the liver section is basically normal, the surface of the liver envelope is smooth, and the echo distribution in the liver is uneven. A hypoechoic area can be seen next to the sagittal part of the left outer lobe of the liver, with a range of about 34 × 21mm, irregular shape, uneven distribution, unclear edge, significantly weakened echo in the rear, and no displacement of blood…	The liver edge is smooth, the proportion of liver lobes is coordinated, and the liver fissure is not wide; Patchy low-density shadow can be seen in liver S3, with CT value of about 38hu and fuzzy boundary, ranging from about 26mm × 26mm × 22mm (transverse diameter × anterior posterior diameter × upper and lower diameter). The lesions on enhanced scan have no low enhancement, with CT value of abou…	None	2	0	0	26	1	28	69.6	41.2	None	16.8	3.2	5.66	56	32	9	2.1	0.9	0	3.17	1.81	0.51	0.12	0.05	0	4.51	143	42.5	94.2	336	31.7	43.2	12.4	240	10.6	12
None	60	1	male	Hepatobiliary pancreatic surgery	2022-10-0909:39:00	0	0	0	1	0	1. liver space occupying lesions: cholangiocyte Ca? 2. diabetes mellitus	Due to the interference of intestinal Qi and obesity, most of the sections are not clearly displayed, which can show the abnormal morphology of the liver section. The surface of the liver envelope is smooth, and the echo distribution in the liver is uneven. A substantial mass can be seen in the left outer lobe of the liver, about 57 × 56mm in size, irregular in shape, hypoechoic in the interior, …	The liver surface is smooth, and the proportion of each lobe is uniform. Irregular slightly low-density shadow, about 50 × 58 × 37mm in size, is seen in the left lobe of the liver. The internal density is uneven, the boundary is not clear, and the CT value is about 50hu; On contrast-enhanced scan, the lesions showed no obvious enhancement in arterial phase, mild irregular ring enhancement in port…	None	1	1	0	58	2	20	69.1	40.9	None	6.6	1.1	7.05	50.6	35.7	9.6	2.7	1.4	0	3.56	2.52	0.68	0.19	0.1	0	5.41	151	46.5	86	325	27.9	41.2	13.2	192	12.4	13.8
None	49	1	male	Hepatobiliary pancreatic surgery	2022-10-1009:15:00	1	0	0	0	0	1. liver space occupying: liver cancer? 2. liver cirrhosis 3. gallstone 4. double kidney cyst	None	None	None	2	0	0	21	1	46	69.4	33.1	None	18.8	3.8	4.8	48.6	40.8	7.5	2.3	0.8	0	2.33	1.96	0.36	0.11	0.04	0	4.22	132	39.8	94.3	332	31.3	41.2	11.9	77	10.9	13.7
None	52	1	male	Hepatobiliary pancreatic surgery	2022-10-1209:23:00	0	0	0	0	1	1. hepatic space occupying lesions; Liver cancer? 2. gallstone with cholecystitis 3. chronic viral hepatitis B 4. hypertension	None	None	The surface of liver was smooth, the proportion of each lobe was uniform, and the signal of liver parenchyma showed grid changes. A kind of oval mixed signal can be seen in S8 of liver, with clear edge and a range of about 44mm × 36.8mm. It is marked by slightly longer T1 and slightly longer T2 signal, and longer T1 and longer T2 signal can be seen in the center of the lesion. The parenchymal com…	1	1	1	44	2	86	66.8	39	None	20.9	5	5.37	63.5	27.6	6.5	2	0.4	0	3.41	1.48	0.35	0.11	0.02	0	6.09	133	42.6	70	312	21.8	39.4	17.2	169	11.5	13.6
None	50	0	female	Hepatobiliary pancreatic surgery	2022-10-1810:21:00	0	0	0	0	0	1. liver space occupying lesions: hemangioma?	None	None	None	None	0	None	None	None	13	79	42.5	None	13.8	2.1	9.04	66.1	25.6	7	0.9	0.4	0	5.98	2.31	0.63	0.08	0.04	0	4.75	138	41.4	87.2	333	29.1	42.7	13.2	339	9.2	9.4
None	42	1	male	Intratumoral (normal)	2022-10-2009:47:00	1	0	0	1	0	1. liver space occupying: liver cancer? 2.2 diabetes mellitus	The shape and size of the liver section are normal, the echo distribution in the liver is uneven, a slightly hyperechoic mass can be seen in the right lobe of the liver, the range is about 156 × 144MM, the shape is irregular, the internal echo distribution is uneven, the edge is not clear, the rear echo has no change, the surrounding is silent halo, the right hepatic vein and the right posterior …	None	None	1	1	0	156	2	29	56.2	31.3	228	27.4	14	6.48	73.1	17.6	7.9	1.1	0.3	0	4.74	1.14	0.51	0.07	0.02	0	3.43	102	30.7	89.5	332	29.7	35.6	10.8	243	10.8	12.3
None	54	0	female	Hepatobiliary pancreatic surgery	2022-10-2109:22:00	0	0	0	0	0	1. Liver space occupying, nature unknown 2. Hypertension	None	External hospital	None	None	0	None	None	None	13	71.1	39.5	None	7.4	1.2	5.22	56	35.1	6.3	1.5	1.1	0	2.92	1.83	0.33	0.08	0.06	0	4.77	135	42.9	89.9	315	28.3	41.9	12.7	298	9.5	10
None	47	1	male	None	2022-10-2400:00:00	0	0	1	0	0	1. hepatic hemangioma	The morphology of the liver section was abnormal, the left half of the liver volume was increased, the echo distribution in the liver was uneven, the front half of the right lobe was thickened and enhanced, and the latter half was slightly sparse and attenuated. Two solid heterogeneous hypoechoic masses, about 128x85mm and 131x86mm in size, can be seen in the left lobe, occupying the entire left …	The volume of the left lobe of the liver was increased, the edge was slightly less smooth, and the density heterogeneity of the liver parenchyma was slightly reduced, and the CT value was about 46hu. On contrast-enhanced scan, the left lobe of the liver was significantly non-uniform enhanced in arterial phase, the left hepatic artery and its branches were thickened, the liver was diffusely distri…	None	2	0	1	108	2	15	64.2	41	None	19	3.9	6.46	63.8	21.8	8.2	5.4	0.8	0	4.12	1.41	0.53	0.35	0.05	0	4.92	161	49.5	100.6	325	32.7	47.5	12.7	228	9.7	11
None	50	0	female	Hepatobiliary pancreatic surgery	2022-10-2509:33:00	0	0	0	0	0	Liver space occupying lesions: hepatic hemangioma?	None	The liver edge is smooth, the proportion of liver lobes is coordinated, the liver fissure is not wide, multiple quasi circular low-density shadows are seen in the liver, the larger one is located in s4/3 of the liver, the boundary is clear, the size is about 45 × 36 × 27mm, the plain CT value is about 47hu, the edge of the enhanced scan is slightly enhanced in the arterial phase, and the enhancem…	None	4	0	1	45	2	49	73	39.2	None	17.9	3.2	4.85	41.1	46.6	8.2	2.7	1.4	0	1.99	2.26	0.4	0.13	0.07	0	4.54	137	41.7	91.9	329	30.2	41.1	12.2	237	12.1	15.4
None	47	1	male	Hepatobiliary pancreatic surgery	2022-10-3109:18:00	0	0	0	0	1	1. liver space occupying: liver Ca? 2. chronic viral hepatitis B	The shape and size of the liver section are normal, the echo in the liver is uneven, an isoechoic mass can be seen in the right lobe of the liver, the size is about 75 × 64mm, the shape is quasi circular, the internal echo is uneven, the boundary is clear, the edge is regular, and the rear echo is unchanged. CDFI: no obvious blood flow signal was found around and inside the intrahepatic mass. Liv…	None	The surface of liver is smooth and the proportion of each lobe is even; A kind of round abnormal signal mass shadow can be seen in the right lobe of the liver, which is isointense and slightly hypointense on T1WI, isointense and slightly hyperintense on T2WI, slightly hyperintense on DWI, and isointense and hyperintense on the corresponding ADC map; The size of the lesion was about 67mm × 64mm × …	1	1	1	75	2	29	71.3	41.4	None	12.2	2.4	c	75.4	14.2	8.2	1.6	0.6	0	5.02	0.95	0.55	0.11	0.04	0	4.53	143	42.2	93.2	339	31.6	39.8	11.7	223	11.2	13.7
None	54	1	male	Minimally invasive interventional Department	2022-11-0310:50:00	0	0	0	0	0	1. liver space occupying: primary liver cancer?; 2. pelvic effusion; 3. cause of fever; 4. hypoalbuminemia; 5. moderate anemia; 6. malnutrition with wasting	Multiple hypoechoic masses of different sizes can be seen in the liver, larger ones are located in the right posterior lobe of the liver, showing multiple nodules fused with each other, the larger range is about 131 × 63mm, and the interior is hypoechoic, with uneven echoes and fuzzy edges. CDFI: abundant blood flow signals can be seen in and around the hypoechoic mass. Liver elastography e:17.1k…	None	None	4	0	0	131	2	22	69	29.8	None	11.4	2.2	18.91	74.8	15.4	7.9	1.5	0.4	0	14.14	2.91	1.49	0.29	0.08	0	2.95	83	26.5	89.8	313	28.1	47	14.3	803	9.4	9.7
None	74	1	male	Minimally invasive interventional Department	2022-11-0410:48:00	0	0	0	0	0	1. massive liver cancer with multiple intrahepatic foci? Invasion of the right kidney, abdominal wall, hilar region, abdominal cavity and multiple lymph node metastasis, left parieto occipital subcutaneous metastasis; 2. malnutrition; 3. cancer pain	None	A huge mass can be seen in the right lobe of the liver, the boundary is not clear, the range is about 13 × 12 × 12cm, and the density is uneven. The enhanced scan shows uneven and progressive enhancement, with patches of low-density shadow visible in it, and no enhancement is seen on the enhanced scan. The disease surrounds the inferior vena cava, and multiple massive low-density shadows can be s…	None	4	0	0	130	2	10	84	32.8	None	8.3	1.9	6.95	64.4	24.5	7.9	2.9	0.3	0	4.48	1.7	0.55	0.2	0.02	0	3.12	95	30.6	98.1	310	30.4	47.3	13.2	146	9.5	9.4
None	54	1	male	Hepatobiliary pancreatic surgery	2022-11-1010:10:00	0	1	0	1	1	1. multicenter primary hepatocellular carcinoma; 2. liver cirrhosis, chronic hepatitis B follow-up; 3. portal hypertension splenomegaly esophagogastric varices; 4. hepatic hemangioma; 5.2 diabetes mellitus; 6. hypertension; 7. hyperlipidemia; 8. hyperuricemia; 9. prostatic hyperplasia	The shape of the liver section is normal, the volume is not large, the echo light spots in the liver are thickened and unevenly distributed, the first half is thickened and enhanced, the second half is sparse and attenuated, the intrahepatic pipeline structure is not clear, and the exit surface is fuzzy. A mixed echo area can be seen in the right lobe of the liver, with a range of about 42 × 35mm…	The ratio of liver lobes was abnormal, the volume was reduced, and the surface was wavy. An irregular low-density shadow was seen in the S4 and S6 segments of the liver, and the boundary was fuzzy. The range was about 45 × 42mm (liver S6) and 28 × 20mm (liver S4), respectively. The portal vein was significantly enhanced in the early stage of enhanced scan, and the enhancement was decreased in the…	None	1	1	0	42	2	18	69	42	None	14.7	3	8.44	74	17.4	7.1	1.3	0.2	0	6.24	1.47	0.6	0.11	0.02	0	5.13	153	46.5	90.6	329	29.8	41.9	12.7	175	10.8	11.8
None	40	0	female	Hepatobiliary pancreatic surgery	2022-11-1509:27:00	0	0	0	0	0	Hepatic hemangioma	None	The shape and size of the liver are normal, and the surface is smooth. A huge mixed slightly low-density shadow can be seen in the right lobe of the liver. The CT value is about 21-38hu, which is lobulated, and the size is about 88.5mm × 75.5mm. After enhancement, obvious nodular enhancement can be seen at the edge of the arterial phase, and the gradual filling in the portal and venous phases is …	None	2	0	None	88.5	2	24	67.6	41.1	None	9.9	2.4	3.66	52.7	38	7.4	1.4	0.5	0	1.93	1.39	0.27	0.05	0.02	0	4.01	123	36	89.8	342	30.7	39.6	12.1	275	9.8	10.2
None	68	1	male	Hepatobiliary pancreatic surgery	2022-11-1609:43:00	1	1	0	0	1	1. liver space occupying lesions: HCC? 2. gallstone with cholecystitis 3. chronic viral hepatitis B 4. hypertension	None	The liver volume was slightly reduced, the surface was wavy, the proportion of liver lobes was imbalanced, the left lobe was increased, the right lobe was relatively reduced, and the intrahepatic density was not uniform; A class of circular low-density shadow with a size of about 30 × 36 × 23mm can be seen in liver S6, which is significantly enhanced in arterial phase on enhanced scan, and a few …	None	2	0	None	36	2	47	73.2	39.7	None	11.9	2.8	4.72	37.8	47	10.6	3.8	0.8	0	1.78	2.22	0.5	0.18	0.04	0	4.4	143	41.9	95.2	341	32.5	47.4	13.3	96	11.7	12.8
None	32	0	female	None	2022-11-1800:00:00	0	0	0	0	0	1. hepatic hemangioma 2. hepatic cyst 3. double kidney stone	None	The liver edge is smooth, the proportion of liver lobes is harmonious, the liver fissure is not wide, and an oval low-density shadow can be seen under the capsule of the right anterior lobe of the liver, the size is about 60 × 39mm, the boundary is clear, and the plain CT value is about 40hu, which is similar to that before. Multiple small round low-density shadows were seen in the remaining live…	None	1	1	1	69	2	24	68.5	40.7	None	7.9	1	4.98	61.7	31.7	4.8	1.4	0.4	0	3.07	1.58	0.24	0.07	0.02	0	3.29	112	33.3	101.2	336	34	52.5	14.2	165	13	18.5
None	51	0	female	None	2022-11-2800:00:00	0	0	0	0	0	1. multiple cysts in the liver 2. after thyroidectomy	None	The size and morphology of the liver are normal, the edges are smooth, and multiple circular low-density shadows of different sizes can be seen in the liver, the largest one is about 67 × 90mm in size (cross-sectional area), the CT value is about 8hu, the boundary is clear, thin-walled separation can be seen in some parts, no enhancement signs can be seen in multiphase scanning after enhancement,…	None	4	0	1	89	2	8	74.5	36.2	None	11.1	2.3	7.33	59	30	9.1	1.5	0.4	0	4.32	2.2	0.67	0.11	0.03	0	4.54	132	40.7	89.6	324	29.1	42.1	12.8	205	11.6	13.6
None	69	0	female	Hepatobiliary pancreatic surgery	2022-12-0609:39:00	0	0	0	0	0	1. liver space occupying lesions: liver cysts? 2. hypertension 3. coronary heart disease after PCI 4. lumbar spine surgery 5. pancreatic space occupying lesions: nodules?	The shape and size of the liver section are normal, the echo of the envelope is regular, the echo of the liver parenchyma is punctate medium echo, evenly distributed, and an echo free area can be seen in the upper segment of the right anterior lobe of the liver, which is about 69 × 59mm in size, quasi circular, with clear boundary, dense weak light spot echo can be seen inside, and the echo in th…	The liver edge is smooth, the proportion of liver lobes is coordinated, the liver fissure is not wide, multiple quasi circular low-density shadows are seen in the liver, the boundary is clear, and no enhancement is seen. The larger one is located in s4/8, the size is about 69 × 63mm, and the diameter of the remaining lesions is about 2-4mm. An oval low-density shadow with a size of about 6 × 13mm…	None	1	1	1	69	2	16	66.4	38	None	26.3	4.7	5.72	43.4	42.3	7.3	6.5	0.5	0	2.48	2.42	0.42	0.37	0.03	0	4.29	134	40.8	95.1	328	31.2	42.6	12.2	139	11.1	12.7
None	78	0	female	Hepatobiliary pancreatic surgery	2022-12-0709:26:00	0	0	0	0	1	1. massive liver cancer in the right lobe of the liver 2. liver cyst 3. chronic viral hepatitis B	None	The liver surface is slightly less smooth, the volume of the right lobe of the liver is slightly increased, the right lobe of the liver can see a huge round like mass like low-density shadow, involving S5, 6, 7, 8, the size is about 95 × 81 × 98mm, the boundary is still clear, the plain CT value is about 32-44hu, its internal density is uneven, after enhancement, the lesions in the arterial phase…	None	1	1	1	98	2	28	63.3	36.2	None	11.7	3.1	4.26	45.5	47.2	5.2	1.9	0.2	0	1.94	2.01	0.22	0.08	0.01	0	4.28	132	40.6	94.9	325	30.8	41.4	11.9	125	10.4	11.1
None	35	0	female	Hepatobiliary pancreatic surgery	2022-12-1509:33:00	0	0	0	0	0	Hepatic space occupying lesions: Hemangiomas	The shape of the liver section is normal, and the echo distribution in the liver is uneven. An anechoic area can be seen in the right posterior lobe of the liver, about 79 × 58mm in size, oval in shape, and an anechoic area inside, with clear boundaries and enhanced echo in the rear. The intrahepatic duct structure was clearly displayed. CDFI: no obvious blood flow signal in the echo free area.	None	The liver edge is smooth, the proportion of liver lobes is coordinated, the liver fissure is not wide, a kind of circular slightly low-density shadow can be seen in s6/7 of the liver, the edge is fuzzy, and the size is about 73 × 71 × 85mm (maximum section × upper and lower diameter). The edge of the enhanced scan is significantly enhanced in arterial phase, and gradually fills the center in port…	1	1	1	79	2	8	69.2	40.4	None	13.7	3.1	6.86	64.9	22.7	8.9	2.5	1	0	4.45	1.56	0.61	0.17	0.07	0	4.63	134	41.7	90.1	321	28.9	40.8	12.4	309	10.1	11.2
None	46	0	female	Hepatobiliary pancreatic surgery	2023-02-0112:14:00	0	1	0	0	1	1. liver space occupying: liver adenoma? Hepatocellular carcinoma? (ct1bn0m0ib stage) 2. liver cirrhosis 3. diffuse large B lymphoma after chemotherapy 4. chronic viral hepatitis B	None	The liver edge is smooth, the proportion of liver lobes is coordinated, the liver fissure is not wide, and the quasi circular slightly low-density shadow with a size of about 31 × 20mm can be seen in the liver S8, and the boundary is fuzzy. Nodular obvious enhancement can be seen in the lesions in the enhanced arterial phase, and the enhancement in the portal venous phase and delayed phase is dec…	None	1	1	0	31	2	31	79.2	42.3	None	11.8	3	6.99	65.9	26.5	7.4	0.1	0.1	0	4.6	1.85	0.52	0.01	0.01	0	4.9	147	44.7	91.2	329	30	44.9	13.3	204	8.8	9.2
None	66	1	male	Hepatobiliary pancreatic surgery	2023-02-0909:06:00	1	0	0	0	0	1. hepatic space occupying lesions; 2. hypertension; 3. liver cyst; 4. renal cyst	None	None	The surface of liver is smooth and the proportion of each lobe is uniform; Oval like slightly long T1 slightly long T2 signal foci can be seen in the liver s5/6, and the reverse phase signal is slightly reduced compared with the positive phase signal. The arterial enhancement can be seen in the late phase, and the relatively low signal appears in the transitional phase of pumeixian, which seems t…	4	0	1	22	1	27	64.6	42	None	18.9	3.8	6.9	66.2	23.5	4.9	4.8	0.6	0.1	4.57	1.62	0.34	0.33	0.04	0.01	6.14	121	38.9	63.4	311	19.7	36.1	18.3	194	None	None
None	40	1	male	Hepatobiliary pancreatic surgery	2023-02-1010:10:00	0	0	0	0	0	Huge abscess of liver	The size and morphology of the liver are normal, and the edge is smooth. A kind of circular slightly low-density shadow can be seen in S8 of the liver, the boundary is not clear, and the size is about 94mm × 80mm × 57mm (section × upper and lower diameter). Its internal density is not uniform, and the CT value is about 26-32hu. There are several nodular calcifications in the center of the lesion.…	The size and morphology of the liver are normal, and the edge is smooth. A kind of circular slightly low-density shadow can be seen in S8 of the liver, the boundary is not clear, and the size is about 94mm × 80mm × 57mm (section × upper and lower diameter). Its internal density is not uniform, and the CT value is about 26-32hu. There are several nodular calcifications in the center of the lesion.…	None	1	1	0	94	2	22	59.9	30.6	None	7.9	1.7	8.1	72.8	21	5.4	0.6	0.2	0	5.89	1.7	0.44	0.05	0.02	0	4.05	116	37.2	91.9	312	28.6	41.9	12.5	390	9.2	9.6
None	42	0	female	None	2023-02-1200:00:00	0	0	0	0	0	1. hepatic hemangioma; 2. liver cyst; 3. hypothyroidism	The shape and size of the liver section are normal, the surface of the liver envelope is smooth, and several slightly hyperechoic masses can be seen in the liver, the larger ones are about 84 × 68 × 52mm (right anterior lobe) and 60 × 55 × 40mm (left inner lobe), with oval shape, clear boundary, and uneven internal echo. CDFI: short strip blood flow signal can be seen in the above mass. CDFI: no …	None	None	4	0	1	84	2	12	66.7	37.6	None	9.6	1.7	5.06	48.3	34.4	11.9	4	1.4	0	2.45	1.74	0.6	0.2	0.07	0	3.64	106	32.3	88.7	328	29.1	44	13.5	352	8.6	8.2
None	64	1	male	Hepatobiliary pancreatic surgery	2023-02-1608:46:00	0	0	0	0	0	1. space occupying lesions in the left lateral lobe of the liver: hepatic hemangioma? 2. gallbladder polyps	The shape of liver section was normal, the volume was not large, and the echo distribution in liver was uneven. A slightly hypoechoic nodule with a size of 46 × 43 × 31mm can be seen in S3 of the left outer lobe of the liver, with regular morphology, clear boundary, and a hyperechoic ring around it. Cdfi: punctate blood flow signal can be seen in it. An anechoic area of about 13 × 11mm in size ca…	The liver edge is smooth, the proportion of liver lobes is coordinated, and the liver fissure is not wide. A kind of circular slightly low-density shadow can be seen in the left outer lobe of the liver, with a CT value of about 42hu, a clear boundary, and a size of about 37 × 35 × 42mm. Spot like and nodular enhancement can be seen at the edge of the lesion in the arterial phase, and the enhancem…	None	2	0	1	46	2	19	63.1	38	None	10.7	1.4	5.18	47.1	38.6	9.3	3.5	1.5	0	2.44	2	0.48	0.18	0.08	0	4.4	137	42.7	97	321	31.1	49.7	13.8	193	10.5	12.2
[truncated: 17 more columns]
